## **Tauopathy in the *APP<sub>swe</sub>/PS1<sub>ΔE9</sub>* mouse model of familial Alzheimer's disease**

Athanasios Metaxas<sup>1\*</sup>, Camilla Thygesen<sup>1,2†</sup>, Stefan J. Kempf<sup>2</sup>, Marco Anzalone<sup>1</sup>, Ramanan Vaitheeswaran<sup>1</sup>, Sussanne Petersen<sup>1</sup>, Anne M. Landau<sup>3,4</sup>, Hélène Audrain<sup>3</sup>, Jessica L. Teeling<sup>5</sup>, Sultan Darvesh<sup>6,7</sup>, David J. Brooks<sup>3,8</sup>, Martin R. Larsen<sup>2</sup>, Bente Finsen<sup>1</sup>

### **Affiliations:**

<sup>1</sup>Institute of Molecular Medicine, University of Southern Denmark, Odense C, Denmark.

<sup>2</sup>Department of Biochemistry and Molecular Biology, University of Southern Denmark, Odense M, Denmark.

<sup>3</sup>Department of Nuclear Medicine and PET Centre, Aarhus University and Hospital, Denmark.

<sup>4</sup>Translational Neuropsychiatry Unit, Aarhus University and Hospital, Denmark.

<sup>5</sup>Biological Sciences, University of Southampton, United Kingdom.

<sup>6</sup>Department of Medical Neuroscience, Dalhousie University, Halifax, NS, Canada.

<sup>7</sup>Department of Medicine (Neurology and Geriatric Medicine), Dalhousie University, Halifax, NS, Canada.

<sup>8</sup>Division of Neuroscience, Department of Medicine, Newcastle University, United Kingdom.

†Shared first authorship

\*To whom correspondence should be addressed:

[ametaxas@health.sdu.dk](mailto:ametaxas@health.sdu.dk); [a.metaxas@hotmail.com](mailto:a.metaxas@hotmail.com)

**One Sentence Summary:** Neurofibrillary tangles in amyloidosis mice

## Abstract

Despite compelling evidence that the accumulation of amyloid-beta ( $A\beta$ ) promotes cortical MAPT (tau) aggregation in familial and idiopathic Alzheimer's disease (AD), murine models of cerebral amyloidosis are not considered to develop tau-associated pathology. The absence of neurofibrillary lesions in amyloidosis mice remains a challenge for the amyloidocentric paradigm of AD pathogenesis. It has resulted in the generation of transgenic mice harboring mutations in their *tau* gene, which may be inappropriate for studying a disease with no known *TAU* mutations, such as AD. Here, we have used *APP<sub>swe</sub>/PSI $\Delta$ E9* mice to show that tau pathology can develop spontaneously in murine models of familial AD. Tauopathy was abundant around  $A\beta$  deposits, with Gallyas- and thioflavin-S-positive perinuclear inclusions accumulating in the *APP<sub>swe</sub>/PSI $\Delta$ E9* cortex by 18 months of age. Age-dependent increases in Gallyas signal correlated positively with binding levels of the paired helical filament (PHF) ligand [ $^{18}$ F]Flortaucipir, in all brain areas examined. Sarkosyl-insoluble PHFs were visualized by electron microscopy. Tandem mass tag proteomics identified sequences of hyperphosphorylated tau in transgenic mice, along with signs of RNA missplicing, ribosomal dysregulation and disturbed energy metabolism. Human frontal gyrus tissue was used to validate these findings, revealing primarily quantitative differences between the tauopathy observed in AD patient vs. transgenic mouse tissue. Levels of *tau* mRNA were not different between *APP<sub>swe</sub>/PSI $\Delta$ E9* and littermate control animals. As physiological levels of endogenous, 'wild-type' tau aggregate secondarily to  $A\beta$  in transgenic mice, this study demonstrates that amyloidosis is both necessary and sufficient to drive tauopathy in experimental models of familial AD.

## Introduction

Genetically-inherited and sporadic forms of Alzheimer's disease (AD) are characterized by a common set of hallmark brain lesions, which include the accumulation of amyloid- $\beta$  (A $\beta$ ) peptides into plaques, neuroinflammation, aggregation of hyperphosphorylated MAPT (tau) into neurofibrillary tangles (NFTs), and neurodegeneration. Transgenic mouse models that reproduce aspects of the aforementioned lesions have been generated based on mutations in the amyloid precursor protein (*APP*) and presenilin 1 (*PSEN1*) and 2 (*PSEN2*) genes, which are known to cause familial AD (1). Despite playing important roles in evaluating APP processing, A $\beta$  toxicity, and amyloid-targeting therapeutic strategies, transgenic mice are not being regarded as models that can replicate the full spectrum of AD histopathology (2). In particular, while the overexpression of mutant *APP* and *APP/PSEN1* has been shown to yield amyloidosis (3), neuroinflammation (4) and neurodegeneration (5) in mice, it is generally not considered to promote the conversion of endogenous tau into neurofibrillary structures (6).

To address the *in vivo* role of tau hyperphosphorylation and NFT formation in AD pathogenesis, human *MAPT* (*TAU*) has been introduced into the mouse genome, either mutated or non-mutated, on a *Tau*-knockout background (7, 8). *TAU* overexpressing mice demonstrate progressive neurofibrillary pathology, albeit in the marked absence of cerebral amyloidosis, which is required for a neuropathological diagnosis of AD. Moreover, mutations in *TAU* have been linked to non-AD tauopathies, most commonly frontotemporal lobar degeneration [FTLD; (9)], a condition with neuropathological hallmarks distinct from AD. Thus, murine models of amyloidosis and combined amyloidosis-tauopathy models have been widely criticized for their translational relevance to the human condition. It has been argued that virtually all existing

murine models would be considered as ‘not’ AD (10) according to the ABC scoring system of neuropathology (11). The inability of amyloidosis mice to develop neurofibrillary lesions is thought to contribute to the poor translation of preclinical research into clinical benefits (12), and has raised concern about the amyloidocentric model of AD pathogenesis (13).

Two principal explanations have been put forward for the lack of tau-associated pathology in amyloidosis mice (14). First, adult mice express fewer isoforms of the tau protein than humans (three vs. six), which might render them less liable to the post-translational modifications (PTMs) that are associated with the accumulation of tau into NFTs, such as phosphorylation (15). However, murine tau has been shown to readily fibrillize *in vitro* upon treatment with polyanionic factors, including RNA (16), and there is ample evidence of tau hyperphosphorylation in the transgenic mouse brain [(17), Table S1], indicating that no differences exist in the propensity of murine and human tau for aggregation and PTMs. A second reason that is often cited for the absence of tauopathy in amyloidosis models is that the murine lifespan may be too short for the complete sequence of neurofibrillary pathology to unfold in transgenic mice. Although age scaling studies suggest otherwise (18), the aging factor has been neglected in the design of preclinical studies.

Transgenic Fischer rats (TgF344-AD), expressing human *APP* harboring the Swedish double mutations (KM670/671NL) and *PSEN1* lacking exon 9 (*APP<sub>swc</sub>/PS1 $\Delta$ E9*), both under control of the mouse prion protein promoter, develop progressive neurofibrillary pathology (19). In this study, transgenic *APP<sub>swc</sub>/PS1 $\Delta$ E9* mice that were constructed in an identical manner as TgF344-AD rats were used to demonstrate neurofibrillary pathology in aging amyloidosis mice.

## Results

### *Neurofibrillary pathology in aging $APP_{swE}/PSI_{\Delta E9}$ mice*

Fresh-frozen brain sections from 3-, 6-, 12-, 18- and 24-month-old  $APP_{swE}/PSI_{\Delta E9}$  transgenic (TG) mice and their wild-type (WT) counterparts were processed for the detection of neurofibrillary alterations with the Gallyas silver stain (n=6/group). Thioflavin-S and DAPI (4',6-diamidino-2-phenylindole) were used to detect perinuclear  $\beta$ -pleated structures. Co-staining for amyloid and Gallyas was used to probe the relationship between amyloidosis and tau-associated pathology in aging TG animals. Fresh-frozen sections of the middle frontal gyrus from a patient with definite AD were processed in parallel with sections from  $APP_{swE}/PSI_{\Delta E9}$  mice, to compare Gallyas-positive structures in mouse vs. human tissue.

A $\beta$  deposition was the predominant lesion in the 6-month-old  $APP_{swE}/PSI_{\Delta E9}$  brain (Fig. 1A&B), with age-dependent increases in argyrophilic density observed exclusively in TG mice (Fig. 1C-F). Only mild and diffuse silver staining was observed in the neocortex of 6-month-old animals (Fig. 1G). Densely-labeled, round structures, surrounded by a halo of argyrophilic staining, constituted the majority of Gallyas-positive signal in the neuropil of the neocortex and hippocampus at 12-24 months of age (Fig. 1H&I). In addition, diffuse and compact argyrophilic staining was observed surrounding red-stained nuclei in the neocortex of 18- and 24-month-old  $APP_{swE}/PSI_{\Delta E9}$  mice (Fig. 1J&K). The perinuclear structures were positive for thioflavin-S (Fig. 1L-N), which colocalized with nuclear DAPI (Fig. 1O) and was further detected in cell-sized structures lacking a stainable nucleus (Fig. 1P). There were no apparent differences in morphology between the argyrophilic structures in brain tissue from 24-month-old TG mice (Fig. 1Q-U) and AD-confirmed patient material (Fig. 1V-Z), although neuropil threads were detected

exclusively in AD tissue (Fig. 1Q-Z). Coronal brain sections of 20-month-old Tg2576 mice, harboring the Swedish double mutations, were used to examine 6E10- and Gallyas-positive pathology in a second mouse model of amyloidosis (Fig. 1AA-AD). Amorphous argyrophilic signal (AC) and perinuclear lesions (AD) were also present in the Tg2576 mouse brain, albeit at lower levels compared to 18-month-old *APP<sub>sw</sub>/PS1 $\Delta$ E9* mice.

The fraction of brain tissue occupied by Gallyas-positive staining in aging *APP<sub>sw</sub>/PS1 $\Delta$ E9* mice is shown in Fig. S1A. Conformationally-altered tau was detected with the MC-1 monoclonal antibody (Fig. S1B). Vascular and meningeal lesions were present in 18- and 24-month-old animals (Fig. S1C).

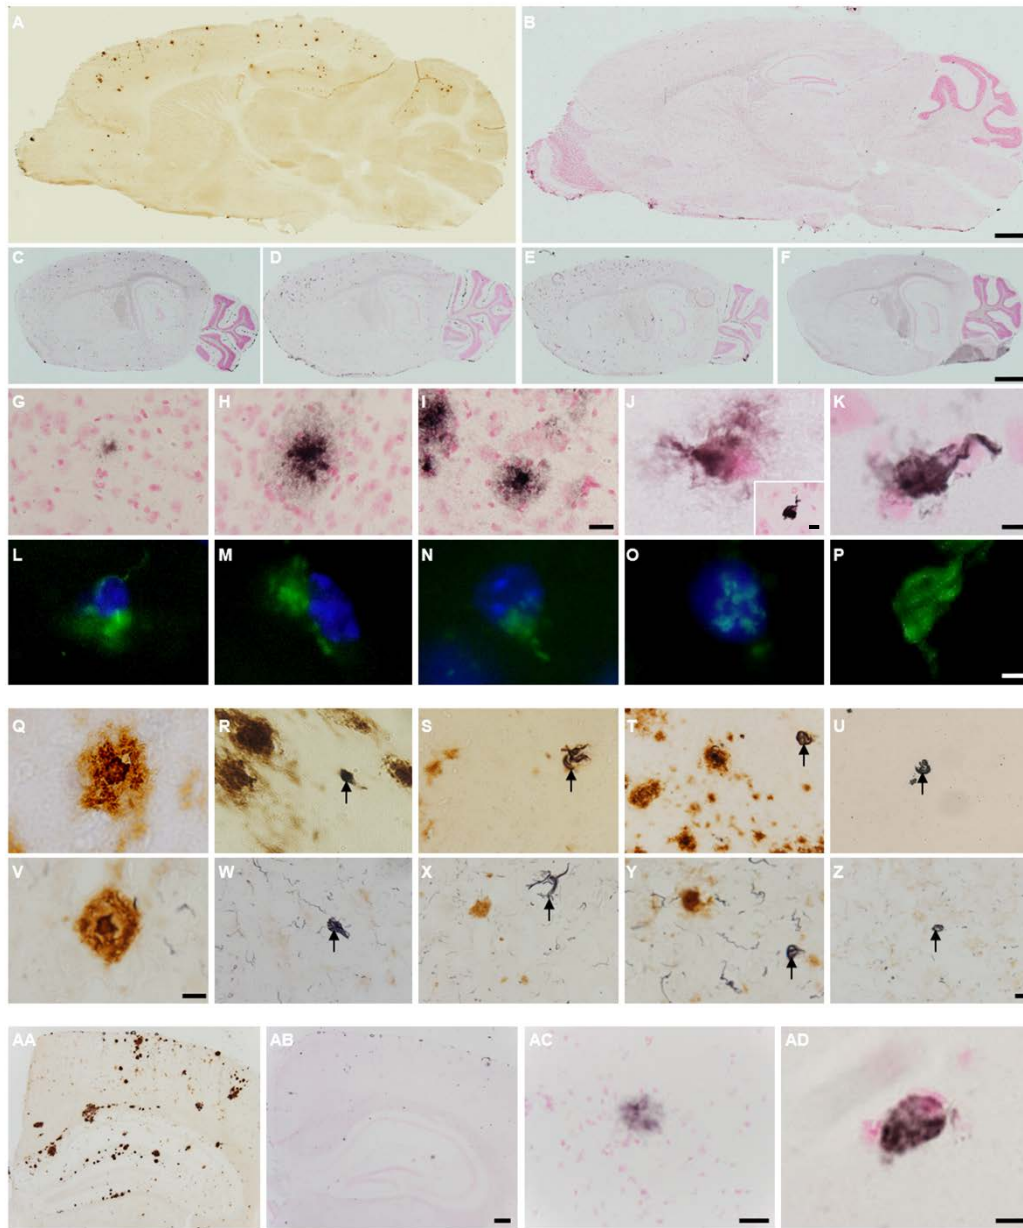

**Fig. 1. Neurofibrillary alterations in amyloidosis mice.** (A&B) Sagittal brain sections of 6-month-old *APP<sub>sw</sub>/PS1<sub>ΔE9</sub>* mice, processed for 6E10 immunohistochemistry (A) and the Gallyas silver stain (B). Silver-labeled sections were counterstained with nuclear fast red.  $\beta$ -amyloidosis dominates over argyrophilic pathology in 6-month-old *APP<sub>sw</sub>/PS1<sub>ΔE9</sub>* mice. (C-F) Progressive increase in Gallyas-positive signal in 12- (C), 18- (D), and 24-month-old transgenic mice (E). Wild-type animals showed no silver deposition up to 24 months of age (F). (G-P) All photomicrographs are from the neocortex of *APP<sub>sw</sub>/PS1<sub>ΔE9</sub>* mice. Argyrophilic signal was scarce in 6-month-old TG animals (G). Gallyas-positive structures in 18- (H) and 24-month-old animals (I), likely of neuritic nature. Gallyas silver (J & K) and thioflavin-S stainings (L-P), showing perinuclear and intranuclear signal in 18- and 24-month-old transgenic mice. The insert in J shows compact Gallyas staining in the absence of nuclear fast red. Note potential fragmented nuclei in (M) and (N), intranuclear signal in (O), and absence of DAPI signal in (P). (Q-Z) Gallyas/6E10 doubly-labeled sections from a 24-month-old transgenic mouse (Q-U) and an AD patient (V-Z),

showing dense-core plaques (Q & V), teardrop-shaped structures (R & W, arrows), tuft-shaped filaments (S & X, arrows), and globose structures in close proximity (T & Y) and over 200  $\mu\text{m}$  afar from A $\beta$  deposits (U & Z). (**AA-AD**) 6E10/Gallyas- (AA) and Gallyas-labeled (AB-AD) sections of 20-month-old Tg2576 mice. Scale bar is 2 mm for A&B, 1 mm for C-F, 10  $\mu\text{m}$  for G-I, 5  $\mu\text{m}$  for J-K, L-P, 10  $\mu\text{m}$  for Q & V, 20  $\mu\text{m}$  for R-U & W-Z, 200  $\mu\text{m}$  for AA&AB, 20  $\mu\text{m}$  for AC, and 5  $\mu\text{m}$  for AD.

### *[<sup>18</sup>F]Flortaucipir autoradiography*

The paired helical filament (PHF) ligand [<sup>18</sup>F]Flortaucipir ([<sup>18</sup>F]AV-1451, [<sup>18</sup>F]T807) was used to quantify tau pathology in aging *APP<sub>swe</sub>/PSI $\Delta$ E9* TG mice by autoradiography (Table 1). Increased binding was observed in the neocortex, hippocampus, amygdala and the cerebellum of 12-month-old *APP<sub>swe</sub>/PSI $\Delta$ E9* mice, compared to age-matched WT, 3- and 6-month-old TG animals ( $P < 0.001$  for all regions; Bonferroni *post-hoc* tests). [<sup>18</sup>F]Flortaucipir binding was further elevated in the visual ( $P < 0.001$ ), somatosensory ( $P < 0.001$ ), motor cortex ( $P < 0.001$ ), and the amygdala ( $P < 0.05$ ) of 18- vs. 12-month-old *APP<sub>swe</sub>/PSI $\Delta$ E9* TG mice. Increased binding over age-matched WT mice was first observed in the thalamus of TG animals at 18 months of age ( $P < 0.001$ ). In 24-month-old *APP<sub>swe</sub>/PSI $\Delta$ E9* mice, [<sup>18</sup>F]Flortaucipir signal had increased in all brain regions examined compared to age-matched controls. Three-way ANOVA confirmed genotype- [ $F_{(1,476)}=2603.1$ ,  $P < 0.001$ ], age- [ $F_{(4,476)}=457.3$ ,  $P < 0.001$ ] and brain region-specific increases in the binding levels of [<sup>18</sup>F]Flortaucipir [ $F_{(9,476)}=42.9$ ,  $P < 0.001$ ], as well as significant age x genotype x region interaction effects [ $F_{(36,476)}=5.5$ ,  $P < 0.001$ ].

Within each brain area analyzed, there was a positive correlation between the age-dependent increase in the binding levels of [<sup>18</sup>F]Flortaucipir and the progressive increases in the density of Gallyas-positive lesions (Pearson  $r$  for all brain regions: 0.92,  $P < 0.001$ ; Fig. S2).



| Brain region                                   | <u>3 months</u> |                | <u>6 months</u> |                | <u>12 months</u> |                | <u>18 months</u> |                | <u>24 months</u> |                | Correlation with Gallyas-positive fraction<br>Pearson r (Significance) |
|------------------------------------------------|-----------------|----------------|-----------------|----------------|------------------|----------------|------------------|----------------|------------------|----------------|------------------------------------------------------------------------|
|                                                | WT              | <i>APP/PSI</i> | WT              | <i>APP/PSI</i> | WT               | <i>APP/PSI</i> | WT               | <i>APP/PSI</i> | WT               | <i>APP/PSI</i> |                                                                        |
| <i>Cortical</i>                                |                 |                |                 |                |                  |                |                  |                |                  |                |                                                                        |
| Frontal                                        | 2.2 ± 0.7       | 3.6 ± 1.3      | 2.3 ± 0.9       | 10.0 ± 1.6     | 4.0 ± 1.0        | 46.7 ± 2.7***  | 4.7 ± 1.1        | 53.2 ± 3.0     | 4.2 ± 1.0        | 55.2 ± 5.7     | 0.74 ( <i>P</i> < 0.001)                                               |
| Motor                                          | 2.5 ± 0.5       | 2.8 ± 0.8      | 2.5 ± 0.7       | 7.3 ± 1.3      | 3.2 ± 0.7        | 31.0 ± 1.3***  | 3.2 ± 0.8        | 45.1 ± 2.0     | 4.3 ± 1.1        | 55.7 ± 2.9     | 0.90 ( <i>P</i> < 0.001)                                               |
| Somatosensory                                  | 5.2 ± 1.3       | 5.0 ± 2.0      | 4.0 ± 0.9       | 11.6 ± 1.9     | 6.7 ± 4.5        | 34.9 ± 2.6***  | 6.5 ± 1.8        | 50.3 ± 1.5     | 5.8 ± 1.6        | 57.8 ± 2.7     | 0.93 ( <i>P</i> < 0.001)                                               |
| Visual                                         | 6.8 ± 2.4       | 4.7 ± 1.4      | 2.4 ± 1.1       | 11.8 ± 2.5     | 8.2 ± 1.8        | 35.5 ± 3.2***  | 6.3 ± 1.9        | 52.9 ± 2.8     | 5.0 ± 1.3        | 56.4 ± 2.9     | 0.92 ( <i>P</i> < 0.001)                                               |
| Entorhinal                                     | 3.2 ± 1.0       | 2.9 ± 1.0      | 3.3 ± 0.8       | 8.8 ± 1.1      | 6.7 ± 1.5        | 29.8 ± 1.9***  | 4.1 ± 2.6        | 40.6 ± 3.8     | 6.3 ± 1.7        | 42.8 ± 4.0     | 0.84 ( <i>P</i> < 0.001)                                               |
| <i>Subcortical</i>                             |                 |                |                 |                |                  |                |                  |                |                  |                |                                                                        |
| Hippocampus                                    | 3.1 ± 1.3       | 2.8 ± 0.8      | 3.0 ± 0.7       | 7.5 ± 1.3      | 4.3 ± 1.3        | 31.3 ± 2.4***  | 4.3 ± 1.2        | 40.9 ± 2.5     | 5.6 ± 1.5        | 49.1 ± 3.1     | 0.86 ( <i>P</i> < 0.001)                                               |
| Striatum                                       | 2.6 ± 1.4       | 3.1 ± 1.0      | 3.1 ± 0.7       | 4.8 ± 0.9      | 4.4 ± 1.1        | 10.9 ± 2.4     | 5.1 ± 1.5        | 17.2 ± 1.2     | 5.4 ± 1.5        | 19.7 ± 2.8**   | 0.64 ( <i>P</i> < 0.001)                                               |
| Amygdala                                       | 1.8 ± 1.5       | 2.9 ± 0.9      | 3.1 ± 0.7       | 7.4 ± 1.0      | 4.2 ± 1.1        | 27.8 ± 2.9***  | 5.2 ± 1.5        | 40.0 ± 2.5     | 5.2 ± 1.1        | 47.7 ± 4.8     | 0.79 ( <i>P</i> < 0.001)                                               |
| Thalamus                                       | 2.6 ± 0.6       | 2.2 ± 0.6      | 3.3 ± 1.0       | 3.5 ± 0.5      | 3.6 ± 0.9        | 11.2 ± 3.2     | 3.9 ± 1.3        | 17.5 ± 2.0***  | 4.1 ± 1.0        | 27.2 ± 4.5     | 0.87 ( <i>P</i> < 0.001)                                               |
| Cerebellum                                     | 4.2 ± 0.8       | 3.1 ± 1.1      | 4.1 ± 1.2       | 10.3 ± 1.1     | 3.3 ± 1.0        | 23.0 ± 3.1***  | 4.5 ± 1.5        | 31.2 ± 3.6     | 5.8 ± 1.6        | 32.4 ± 3.7     | 0.83 ( <i>P</i> < 0.001)                                               |
| <i>Mean binding levels (all brain regions)</i> | 3.4 ± 1.1       | 3.3 ± 1.1      | 3.1 ± 0.9       | 8.3 ± 1.3      | 4.9 ± 1.5        | 28.2 ± 2.6     | 4.8 ± 1.5        | 38.9 ± 2.5     | 5.2 ± 1.3        | 44.4 ± 3.7     | 0.92 ( <i>P</i> < 0.001)                                               |

**Table 1. Autoradiography of [<sup>18</sup>F]Flortaucipir binding sites in aging *APP<sub>swe</sub>/PSI<sub>ΔE9</sub>* mice.** Fresh-frozen brain sections from *APP<sub>swe</sub>/PSI<sub>ΔE9</sub>* and age-matched wild-type (WT) animals were incubated with 38.4±9.6 MBq [<sup>18</sup>F]Flortaucipir for a period of 60 min (specific activity: 145±68 GBq/μmol). Autoradiography data are presented as the mean specific binding of [<sup>18</sup>F]Flortaucipir (kBq/mL) ± standard error of the mean in brain regions of 5-6 animals/group. By 24 months of age, [<sup>18</sup>F]Flortaucipir binding in *APP<sub>swe</sub>/PSI<sub>ΔE9</sub>* mice had increased across all brain areas examined vs. age-matched WT animals. The age-dependent increase in [<sup>18</sup>F]Flortaucipir binding levels was positively correlated with the progressive increase in Gallyas-positive argyrophilic signal, in all TG brain areas examined. \*\**P* < 0.01, \*\*\**P* < 0.001 vs. age-matched littermate control mice, Bonferroni *post-hoc* tests. Symbols of significant differences between groups of 24 & 18 vs. 3-, 6- and 12-month-old-mice were omitted from the table for clarity of presentation.

Representative autoradiograms of [ $^{18}\text{F}$ ]Flortaucipir binding sites are shown in Fig. 2. Binding was decreased in the presence of 50  $\mu\text{M}$  unlabeled flortaucipir but was not reversed by 1  $\mu\text{M}$  of the amyloid-preferring Pittsburgh compound B (PIB).

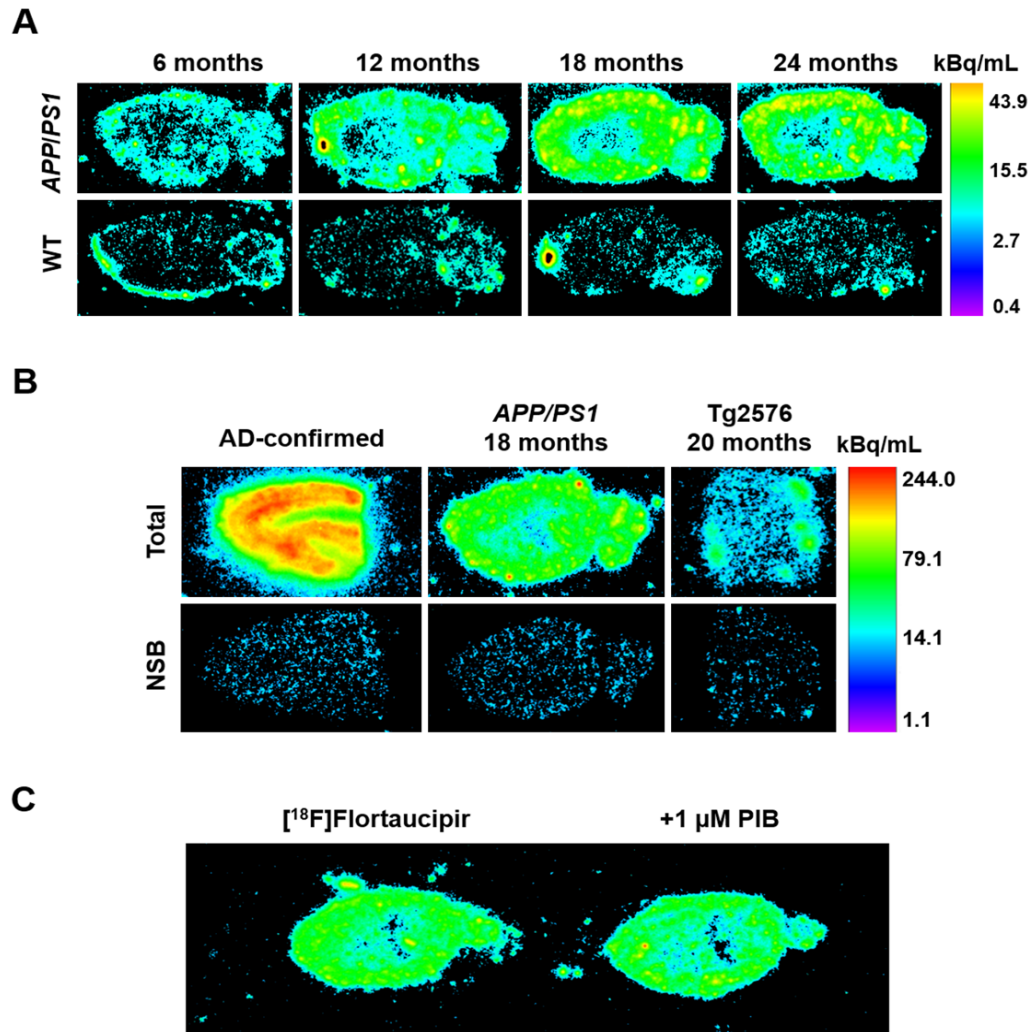

**Fig. 2. Representative autoradiograms of [ $^{18}\text{F}$ ]Flortaucipir binding sites.** (A) Sagittal brain sections of aging transgenic (top panel) and wild-type mice (WT, lower panel), taken at the level of the entorhinal cortex [lateral  $2.88 \pm 0.12$  mm of the Paxinos and Franklin mouse atlas (74)]. Images were analyzed on a black & white display mode, and presented as a pseudocolor interpretation of black & white pixel intensity, calibrated in kBq/mL of [ $^{18}\text{F}$ ]Flortaucipir solution. Age-dependent increases in binding levels were observed exclusively in  $APP_{\text{swe}}/PS1_{\Delta\text{E9}}$  mice. (B) [ $^{18}\text{F}$ ]Flortaucipir binding in sections from the middle frontal gyrus of AD-confirmed patients, 18-month-old  $APP_{\text{swe}}/PS1_{\Delta\text{E9}}$  mice and 20-month-old Tg2576 animals, showing the magnitude of tau pathology in patient vs. transgenic mouse tissue. Non-specific binding (NSB) was assessed in the presence of 50  $\mu\text{M}$  'cold' flortaucipir. (C) Binding was not blocked by co-incubating sections with [ $^{18}\text{F}$ ]Flortaucipir and 1  $\mu\text{M}$  of the amyloid-targeting agent Pittsburgh Compound B (PIB).

### *Mapt* expression

Relative expression of total *Mapt* mRNA was determined by RT-qPCR (Fig. 3). There were no age [ $F_{(4,50)}=0.29$ ,  $P>0.05$ ], genotype [ $F_{(1,50)}=0.93$ ,  $P>0.05$ ], or age x genotype interaction effects on the expression levels of *Mapt* [ $F_{(4,50)}=1.21$ ,  $P>0.05$ ].

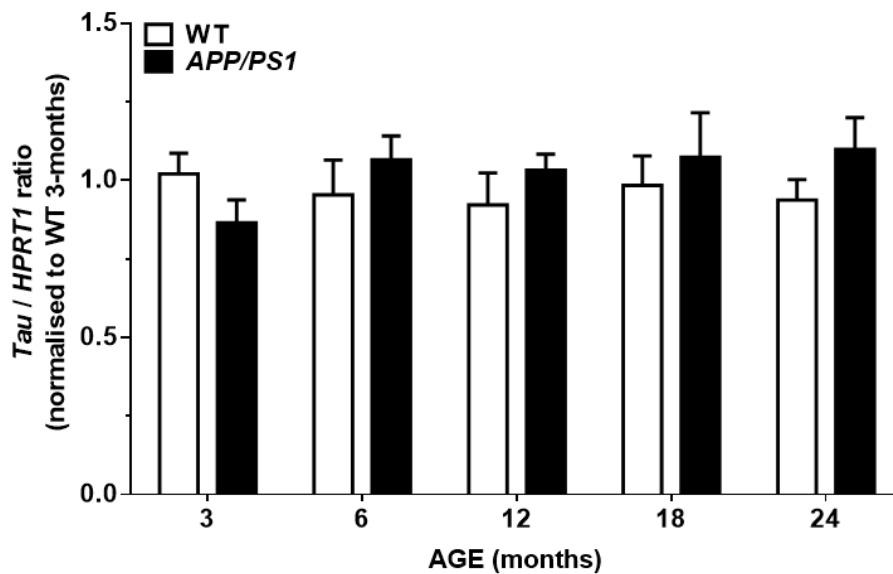

**Fig. 3. Regulation of *Mapt* mRNA in aging mice.** Levels of endogenous murine *tau* mRNA were not altered by age or genotype. PCR products of x4 diluted *tau* cDNA were determined after 24 cycles. A single peak was obtained by melt-curve analysis, and no signal was detected in the genomic DNA and buffer controls. The efficiency of amplification was  $99.2\pm 0.2\%$  for *Hprt1* and  $100.3\pm 2.1\%$  for *Mapt*.

### *Isolation and Transmission Electron Microscopy (TEM) of sarkosyl-insoluble tau*

The general methods of Sahara et al. (20) and Greenberg and Davies (21) were evaluated for the extraction of PHFs from the 24-month-old *APP<sub>swe</sub>/PS1 $\Delta$ E9* TG brain (Fig. S3). Although longer filaments were isolated by the procedure of Sahara et al., the Greenberg and Davies method was chosen for the isolation of sarkosyl-insoluble tau from 3- and 24-month-old mice, based on immunoblotting experiments, solubility considerations, and to allow for comparisons with literature data (22). Soluble and insoluble tau levels were measured in mouse brain homogenates

by using the mouse Total Tau Meso Scale kit (Meso Scale Diagnostics LLC). TEM was used to visualize filaments in the sarkosyl-insoluble extracts from the TG mouse and AD patient brains by negative staining.

Tau protein levels increased with age in the pellet obtained by centrifuging WT and *APP<sub>swe</sub>/PSI $\Delta$ E9* homogenates at 27,000 x g [Fig. 4A; age effect:  $F_{(1,18)}=50.0$ ,  $P<0.001$ ; genotype effect:  $F_{(1,18)}=2.4$ ,  $P>0.05$ ]. Levels of tau in the supernatant fraction were not different between 3- and 24-month old, WT and *APP<sub>swe</sub>/PSI $\Delta$ E9* TG animals [age:  $F_{(1,16)}=0.6$ ,  $P>0.05$ ; genotype:  $F_{(1,16)}=0.0$ ,  $P>0.05$ ]. Treatment of the supernatant with 1% sarkosyl for 2 h at 37°C increased the concentration of tau in the detergent-soluble fraction by >3-fold. Sarkosyl-soluble tau levels were lower in the 24- vs. 3-month-old mouse brain [ $F_{(1,16)}=12.5$ ,  $P<0.01$ ], irrespective of genotype [ $F_{(1,16)}=0.5$ ,  $P>0.05$ ]. Sarkosyl-insoluble tau was not detected in 3-month-old animals, and its levels were not different between 24-month-old *APP<sub>swe</sub>/PSI $\Delta$ E9* and WT mice [ $t_{(8)}=0.7$ ,  $P>0.05$ ; independent two-tailed Student's t-test].

Fig. 4B shows negatively-stained filaments in the sarkosyl-insoluble extract from the 24-month-old *APP<sub>swe</sub>/PSI $\Delta$ E9* mouse and AD patient brain. Fibrils of mean length  $104.9\pm 8.3$  nm and width  $10.1\pm 0.5$  nm were isolated from TG mice. Wider fibrils (~20 nm), with or without a pronounced twist, were readily detected (a & e). Longer filaments ( $271.7\pm 11.3$  nm), with axial periodicities of  $78.7\pm 9.8$  nm, constituted ~8% and ~34% of the fibril population analyzed in the *APP<sub>swe</sub>/PSI $\Delta$ E9* and AD brains, respectively (b & f). Clusters of long filaments, which were denser in AD patient material, were present in the insoluble preparation from *APP<sub>swe</sub>/PSI $\Delta$ E9* mice (b & f, inserts). Thin, bent fibrils (c & g) and rod-shaped particles (d & h) were observed in

both 24-month-old  $APP_{swe}/PS1_{\Delta E9}$  and AD brains. There were no between-species differences in the dimensions of the isolated filaments [short filaments, length:  $t_{(82)}=0.1$ ,  $P>0.05$ , width:  $t_{(82)}=1.2$ ,  $P>0.05$ ; long filaments, length:  $t_{(16)}=0.3$ ,  $P>0.05$ , width:  $t_{(16)}=0.8$ ,  $P>0.05$ ; independent two-tailed t-tests].

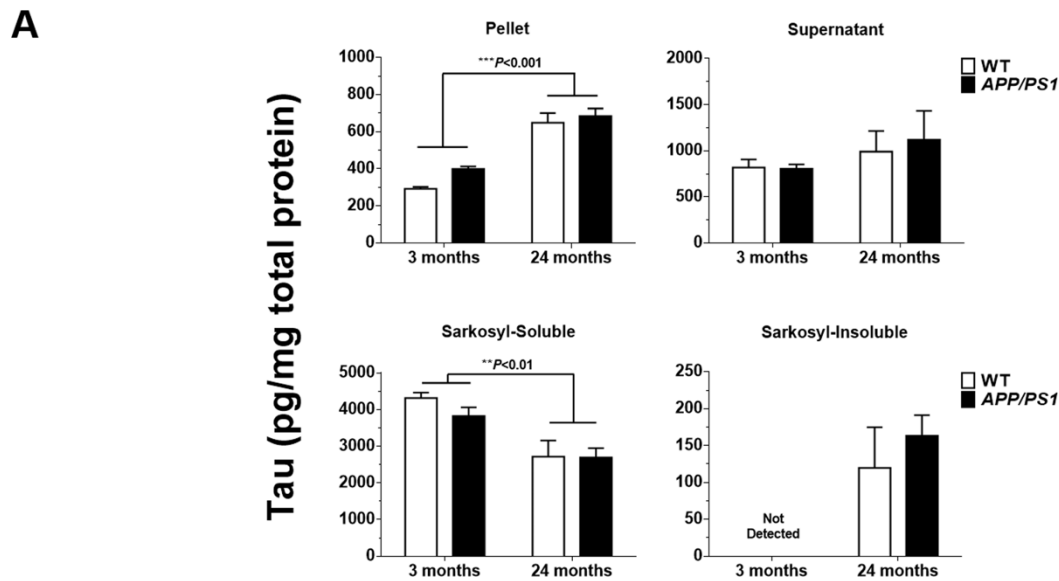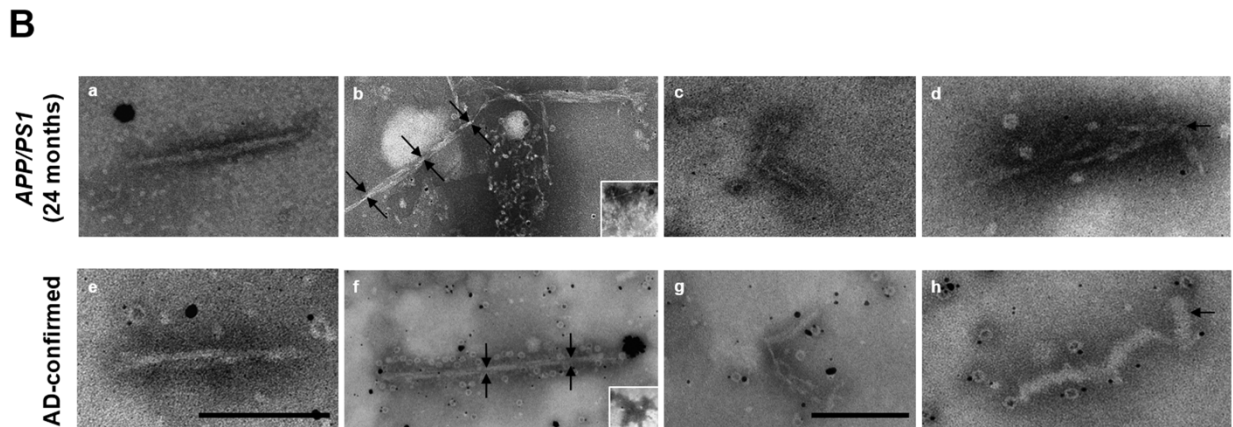

**Fig. 4. Isolation and electron microscopy of sarkosyl-insoluble tau.** (A) Levels of soluble and insoluble tau were determined with the mouse Total Tau Meso Scale kit. Tau levels increased with age in the pellet obtained by centrifuging brain homogenates at 27,000 x g. The resulting supernatant was treated with 1% sarkosyl and centrifuged at 200,000 x g. The solubility of tau in sarkosyl was decreased with age, irrespective of genotype. (B) Overview of negatively-stained filament types in the sarkosyl-insoluble fraction from 24-month-old  $APP_{swe}/PS1_{\Delta E9}$  and AD brain tissue. Fibrils of ~20 nm in width, appearing as straight filaments (a) or as two intertwined fibrils (e), each with a diameter of ~10 nm. PHFs with axial periodicities of ~80 nm (b & f; arrows) were present in  $APP_{swe}/PS1_{\Delta E9}$  mice, and more frequently observed in AD patient material. The inserts show 'stacked' PHFs, which

were denser in the AD preparation. Structures commonly identified in the detergent-insoluble fractions of the mouse and human brain included bent fibrils of ~7 nm in width (c & g), and rod-shaped particles (d & h; arrows). Scale bars: 200 nm (a, b, e, f), 100 nm (c, d, g, h).

### *Proteomics of sarkosyl-insoluble tau*

The sarkosyl-insoluble fractions extracted from 3- and 24-month-old mouse brain, AD and non-AD individuals, were pooled and digested with trypsin & Lys-C. The peptides were labeled with Tandem Mass Tags (TMT), fractionated, and analyzed by nanoLiquid Chromatography-Electrospray Ionization Mass Spectrometry (LC-ESI MS/MS).

A list of tau-associated proteins quantified in the sarkosyl-insoluble proteome is shown in Table 2. Lists of between-group abundance ratios for all regulated proteins are shown in Data File S1. There were 583 proteins identified in the sarkosyl-insoluble mouse proteome, of which 456 were also present in the human samples. Isoforms of tau with three (3R) and four (4R) microtubule-binding repeats were extracted from both human and the murine brain. In mice, all isoforms collapsed under the term microtubule associated protein (MAP; UniProt accession number: B1AQW2). Mouse MAP was regulated by age, rather than genotype. The protein was enriched 2.1-fold in 24- vs. 3-month-old TG mice, and 1.8-fold in 24- vs. 3-month-old WT mice. Genotype-specific enrichment was observed for mouse tau isoform-B (UniProt accession number: P10637-3), a 3R isoform of tau with an extended C-terminal domain, which was identified by the sequence <sup>205</sup>KVQIVYKPV<sup>DLSKV</sup><sup>218</sup>. Tau isoform-B increased 3.2-fold in 24-month-old TG vs. WT mice, and 4.5-fold in 24- vs. 3-month-old TG animals. Human MAP (UniProt accession number: A0A0G2JMX7), containing tau isoforms P10637-2, -4, -6 & -8, was 37-fold enriched in the sarkosyl-insoluble fraction of AD compared to non-AD brain.

| UniProt Accession Number               | Protein(s)                                               | Involvement                                | TG vs. WT<br>3 months                                                                                     | TG vs. WT<br>24 months | TG<br>24 vs. 3 months | WT<br>24 vs. 3 months | AD vs. non-AD      |
|----------------------------------------|----------------------------------------------------------|--------------------------------------------|-----------------------------------------------------------------------------------------------------------|------------------------|-----------------------|-----------------------|--------------------|
| B1AQW2                                 | Microtubule-associated protein                           | Tau                                        | 0.86                                                                                                      | 1.00                   | 2.06                  | 1.77                  | 37.15              |
| P10637-3                               | Microtubule-associated protein tau                       | Tau Isoform-B                              | 0.61                                                                                                      | 3.21                   | 4.52                  | 0.86                  | Fetal form present |
| Multiple                               | Small nuclear ribonucleoproteins (snRPN)                 | Core spliceosomal components               | Age- and genotype-specific regulation (Data File S1)                                                      |                        |                       |                       |                    |
| Multiple                               | Heterogeneous nuclear ribonucleoproteins                 | Exon 10 splicing regulation                | Multiple proteins regulated (Data File S1)                                                                |                        |                       |                       |                    |
| Q8BL97                                 | Serine/arginine-rich splicing factor 7                   | Exon 10 exclusion                          | 0.82                                                                                                      | 1.05                   | 1.11                  | 0.87                  | 0.69               |
| Q9Z0H4                                 | CUGBP Elav-like family member 2                          | Exon 10 exclusion                          | 0.40                                                                                                      | 1.85                   | 1.94                  | 0.42                  | 1.49               |
| P62996                                 | Transformer-2 protein homolog beta                       | Exon 10 inclusion                          | 0.85                                                                                                      | 1.13                   | 0.74                  | 0.56                  | Not identified     |
| Multiple                               | Tubulin                                                  | Tau binding partner                        | Alpha & beta chains regulated (Data File S1)                                                              |                        |                       |                       |                    |
| P60710                                 | Actin, cytoplasmic 1                                     | Tau binding partner                        | 0.80                                                                                                      | 0.53                   | 1.43                  | 2.16                  | 0.71               |
| P08551, P08553, P19246                 | Neurofilament                                            | Tau binding partner                        | Light, medium & heavy polypeptides regulated (Data File S1)                                               |                        |                       |                       |                    |
| Multiple                               | Ribosomal proteins 60S, 40S                              | Tau binding partner                        | Age- and genotype-specific changes, particularly in the acidic proteins of the 60S subunit (Data File S1) |                        |                       |                       |                    |
| O08788                                 | Dynactin                                                 | Tau binding partner                        | 1.01                                                                                                      | 1.34                   | 0.79                  | 0.59                  | Not identified     |
| P28738                                 | Kinesin                                                  | Tau binding partner                        | 0.92                                                                                                      | 0.75                   | 1.03                  | 1.28                  | 0.90               |
| P11499, Q80Y52, Q3UAD6                 | Heat shock protein 90                                    | Tau binding partner                        | Isoforms alpha & beta identified (Data File S1)                                                           |                        |                       |                       |                    |
| P48722, P17156, Q3U2G2, Q8K0U4         | Heat shock protein 70                                    | Tau binding partner                        | Members 2 & 4 common in mice & humans (Data File S1)                                                      |                        |                       |                       |                    |
| P0DP26                                 | Calmodulin-1                                             | Tau binding partner                        | 1.68                                                                                                      | 0.31                   | 0.68                  | 3.63                  | 0.93               |
| Q3UY00                                 | S100 $\beta$                                             | Tau binding partner                        | 0.99                                                                                                      | 0.52                   | 1.27                  | 2.44                  | 0.34               |
| O55042                                 | $\alpha$ -Synuclein                                      | Tau binding partner                        | 0.81                                                                                                      | 0.70                   | 1.29                  | 1.49                  | 0.79               |
| A8IP69, P68510, F6VW30, Q9CQV8, P63101 | 14-3-3 proteins                                          | Tau binding partner                        | Isoform-specific changes (Data File S1)                                                                   |                        |                       |                       |                    |
| Q3TXU4                                 | Apolipoprotein E                                         | Tau binding partner/<br>AD risk factor     | 0.65                                                                                                      | 3.58                   | 7.51                  | 1.37                  | Not identified     |
| O08539                                 | Bin1                                                     | Tau binding partner/<br>AD risk factor     | 2.11                                                                                                      | 0.44                   | 0.71                  | 3.41                  | 1.44               |
| Q549A5                                 | Clusterin                                                | Tau interacting partner/<br>AD risk factor | 1.17                                                                                                      | 1.82                   | 1.87                  | 1.20                  | Not identified     |
| P11798, Q923T9, A0A0G2JGS4             | Ca <sup>2+</sup> /calmodulin-dependent protein kinase II | Tau kinase                                 | Multiple subunits identified (Data File S1)                                                               |                        |                       |                       |                    |
| P63318                                 | Protein kinase C, gamma type                             | Tau kinase                                 | 0.71                                                                                                      | 1.48                   | 1.30                  | 0.62                  | 1.05               |
| P31324                                 | cyclic AMP-dependent protein kinase II                   | Tau kinase                                 | 0.57                                                                                                      | 0.91                   | 1.61                  | 1.01                  | 0.84               |
| Q63810                                 | Calcineurin subunit B type 1                             | Tau phosphatase                            | 1.36                                                                                                      | 0.34                   | 0.96                  | 3.84                  | Not identified     |
| Q76MZ3                                 | Serine/threonine-protein phosphatase 2A                  | Tau phosphatase                            | 1.25                                                                                                      | 0.58                   | 0.87                  | 1.88                  | 0.73               |

**Table 2. Proteomics of sarkosyl-insoluble tau.** Tau-associated proteins quantified in the detergent-insoluble fractions of the mouse and human brain. The presented proteins have been selected for their documented roles in the regulation and binding of tau.

The mouse MAP sequence <sup>174</sup>KVAVVVRTPPKSPSASKS<sup>190</sup>, phosphorylated at Threonine (T) 180 and Serine (S) 188, was more than 20-fold enriched in 24-month-old TG, compared to age-matched WT and 3-month-old *APP<sub>swc</sub>/PSI<sub>ΔE9</sub>* mice. The peptide sequence was not regulated in aging WT animals. An orthologous sequence of the human MAP was phosphorylated at Threonine (T) 566 and Serine (S) 573 (<sup>560</sup>KVAVVVRTPPKSPSSAKS<sup>576</sup>). The reported phosphorylation sites correspond to amino acids (aa) T231 and S238 of the human tau isoform with 441 aa. Indications of additional phosphorylation sites were obtained by searching modified peptides against tau isoform- and species-specific databases. Phosphorylated S396, S400 and S404 on the conserved sequence <sup>396</sup>SPVVSGDTSPR<sup>406</sup> of the human 441 aa isoform were identified in the sarkosyl-insoluble mouse proteome. Phosphorylation at S404 in 24-month-old TG mice was confirmed by immunoblotting (Fig. S4). In addition to phosphorylation, murine MAP was deamidated at Asparagine (N) 44, a site on the N-terminal domain of tau that is not conserved in humans (<sup>34</sup>AEEAGIGDTPNQEDQAAGHVTQAR<sup>57</sup>). Human MAP was deamidated at position N484, corresponding to N167 of the 441 aa tau isoform (<sup>473</sup>GAAPPGQKGQANATRIPAK<sup>491</sup>).

The database for annotation, visualization and integrated discovery (DAVID, v6.8) was used for gene ontology (GO) enrichment analysis of the sarkosyl-insoluble proteome (23, 24). RNA splicing, mRNA processing and translation were among the 10 most enriched biological processes associated with protein upregulation in 24-month-old *APP<sub>swc</sub>/PSI<sub>ΔE9</sub>* vs. WT mice and AD vs. non-AD subjects. Ribonucleoprotein complexes, ribosomes, and exosomes were among the 10 most enriched cellular components in the insoluble extracts from the mouse and human brain (Fig. 5A). The top 10 molecular functions of the enriched proteins were associated with



poly(A) RNA binding, as well as binding of molecules contributing to the structural integrity of ribosomes and the cytoskeleton (Fig. 5B). Pathway-based enrichment analysis of upregulated proteins in 24-month-old *APP<sub>swE</sub>/PSI $\Delta$ E9* vs. WT mice involved GO terms such as Alzheimer's and Huntington's disease, long-term depression, cholinergic, serotonergic and glutamatergic synapse (Fig. 5C). Glycolysis/gluconeogenesis and the Krebs cycle were among the top 10 pathways for downregulated proteins (Fig. 5D).

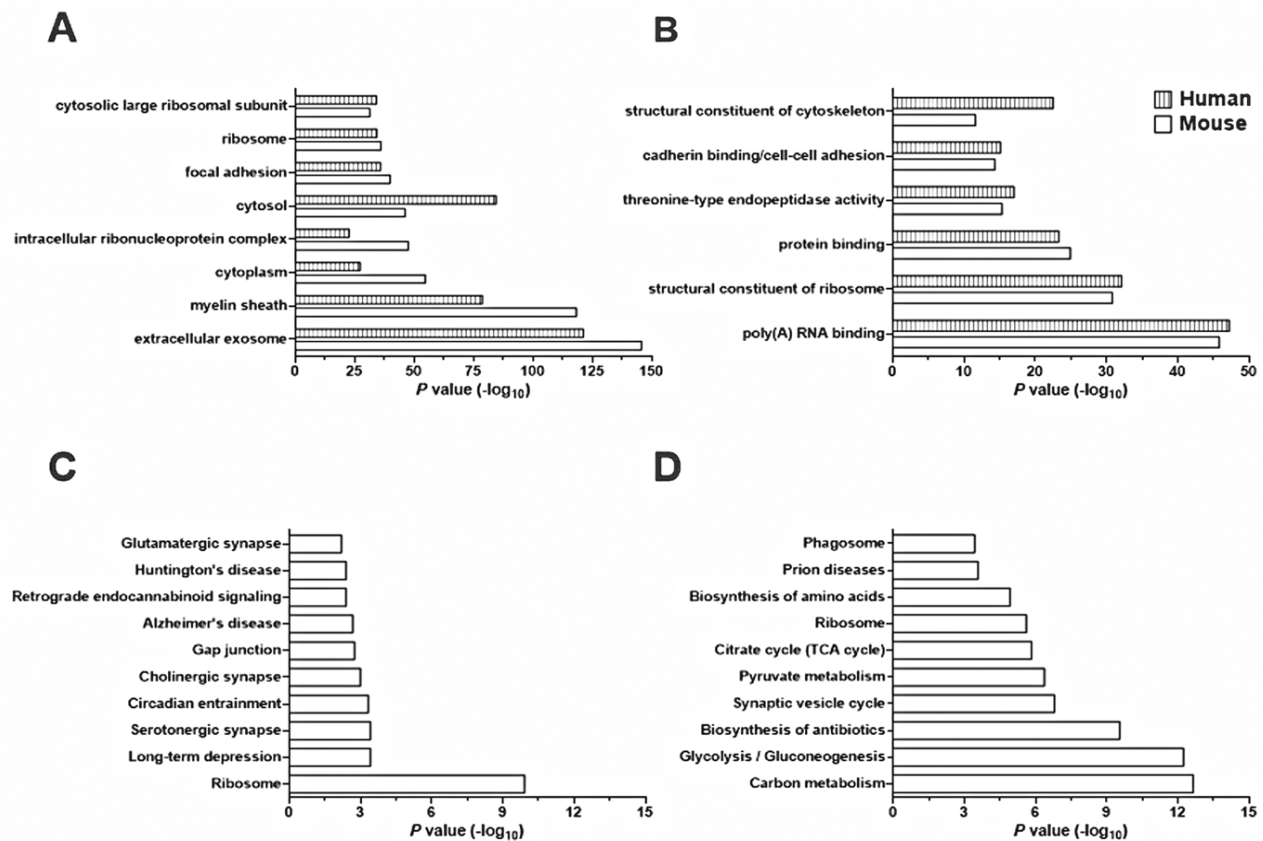

**Fig. 5. Gene Ontology (GO) enrichment analysis of the sarkosyl-insoluble proteome.** (A) Enriched cellular components; (B) Enriched molecular functions; (C) Top 10 enriched pathways based on protein upregulation in 24-month-old TG vs. WT mice, according to the Kyoto Encyclopedia of Genes and Genomes (KEGG); (D) Top 10 enriched KEGG pathways based on protein downregulation in 24-month-old TG vs. WT mice. Functional annotation clustering was generated by using DAVID software. Maximum enrichment probability ( $P$  value) was based on an EASE score threshold value of 0.05.

## Discussion

The present study describes tauopathy in murine models of familial AD. Neurofibrillary alterations in *APP<sub>swe</sub>/PSI $\Delta$ E9* and Tg2576 mice were demonstrated by a set of tools that are currently used for the evaluation of pathological tau clinically, such as the Gallyas silver stain and [<sup>18</sup>F]Flortaucipir. The presence of PHF tau was confirmed by TEM of sarkosyl-insoluble preparations from the *APP<sub>swe</sub>/PSI $\Delta$ E9* mouse brain. As murine tau possesses a remarkably high number of 76 potential serine/threonine and 4 tyrosine phosphorylation sites, an antibody-free proteomics approach was used for the detection of tauopathy-related epitopes. Of the five hyperphosphorylated sites identified, S404 has been associated with the intraneuronal and extracellular deposition of NFTs in AD (25). The pathology observed in the present study occurred at physiological levels of endogenous tau, as there was no difference in total tau mRNA and protein between *APP<sub>swe</sub>/PSI $\Delta$ E9* and WT mice. Hence, in addition to progressive amyloidosis (3), neuroinflammation (4) and neurodegeneration (5), *APP<sub>swe</sub>/PSI $\Delta$ E9* mice develop progressive neurofibrillary pathology of the AD type, mimicking a range of AD pathologies, in a translationally-relevant manner. The observation that endogenous tau accumulates secondarily to A $\beta$  in models of cerebral amyloidosis is entirely consistent with *post-mortem* (26) and *in vivo* imaging data (27), showing that the development of cortical tau pathology in AD patients is associated with, and may depend on, pre-existing amyloid pathology.

Current approaches to induce tauopathy in mice have been criticized for generating models that poorly recapitulate the situation in the AD brain, as *TAU* in AD is neither overexpressed, nor mutated (28). FLTD-linked mutations, in particular, induce tauopathy that is not only morphologically different than that of AD (e.g. Pick bodies), but further characterized by distinct

neurodegenerative processes. For example, cholinergic neurons are extensively lost in AD, but not in FTLN (29). Acetylcholinesterase inhibitors, which are prescribed for the symptomatic relief of cognitive impairment in AD, are largely ineffective in FTLN and may even worsen its symptoms (30). Thus, the pathophysiology that differentiates AD from primary tauopathies is unlikely to be modeled in mutant *TAU* models. Moreover, neurofibrillary alterations in *TAU* overexpressing mice occur in the absence of A $\beta$  deposition, which is a defining feature of AD histopathology. The present results indicate that amyloidosis models may overcome these limitations, by reproducing both the neurofibrillary pathology of familial AD and the molecular heterogeneity that is associated with it. In addition to the spontaneous aggregation of tau in *APP<sub>swe</sub>/PSI $\Delta$ E9* and Tg2576 mice, analysis of the sarkosyl-insoluble *APP<sub>swe</sub>/PSI $\Delta$ E9* proteome identified proteins that have been strongly linked to AD pathogenesis, in general, and tau pathology in particular. Among them, APOE and BIN1 are encoded by genes whose variants are known to increase the risk of late-onset AD, through pathways involving interactions with both APP (31, 32) and tau (33-35). Core components of the spliceosome, on the other hand, particularly Sm-D1 and Sm-D2, are closely related to the deposition of NFTs, but not plaques in familial AD (36). This literature implicates multiple mechanisms in AD tauopathy, which occur downstream of A $\beta$  processing in cases of autosomal dominant AD (ADAD) and, as shown here, *APP<sub>swe</sub>/PSI $\Delta$ E9* mice.

Although the sporadic and familial forms of AD share common clinical and histopathological features, it is becoming increasingly recognized that they are not precisely equivalent (37). Positron emission tomography (PET) with [<sup>11</sup>C]PIB demonstrates accumulation of A $\beta$  in the cerebellum of familial AD cases, which is not typical of sporadic AD (38). Cerebellar deposition

of hyperphosphorylated tau has been observed in ADAD cases harboring the *PSEN1* E280A mutation, but not in sporadic AD (39). Thus, the pronounced cerebellar involvement in *APP<sub>swe</sub>/PSI $\Delta$ E9* mice, which are known to accumulate A $\beta$  in this region (40), suggests that the model mimics familial, rather than the sporadic forms of AD. Reports of cerebellar pathology in ADAD cases and *APP<sub>swe</sub>/PSI $\Delta$ E9* mice warrant caution in using the cerebellum as a reference region for the quantification of [<sup>11</sup>C]PIB and [<sup>18</sup>F]Flortaucipir PET (41, 42), as this is likely to underestimate cortical A $\beta$  and tau pathology, respectively.

Unlike the imbalance in A $\beta$  homeostasis, which is thought to be central in the pathogenesis of AD, gross changes in tau production and clearance were not observed in this study. On the one hand, Gallyas-, [<sup>18</sup>F]Flortaucipir- and thioflavin-S-positive signal was observed in the vasculature of 18-24-month-old *APP<sub>swe</sub>/PSI $\Delta$ E9* mice. Moreover, there were age- and genotype-specific changes in multiple components of the phagosome and proteasome in TG vs. WT animals (Data File S1). On the other hand, total tau mRNA and protein levels were not different between 24-month-old WT and TG mice, as evidenced by tau mesoscale, proteomics and PCR. Moreover, age-dependent decreases in the solubility of tau were equally observed in *APP<sub>swe</sub>/PSI $\Delta$ E9* and control animals. Notwithstanding that the contribution of individual pathways to tau degradation was not assessed in this study, these findings suggest that the neurofibrillary alterations observed in *APP<sub>swe</sub>/PSI $\Delta$ E9* mice are not mediated by an imbalance between the production and clearance of tau. It is important to note that, unlike in TG mice, sarkosyl-insoluble tau was increased in AD vs. non-AD tissue, a finding that is consistent with literature data on the regulation of human tau in AD (43). It might be that the increased concentration of brain tau in late-stage AD is associated with heavily impaired clearance pathways or pronounced neuronal damage, processes

that may not be modeled in 24-month-old *APP<sub>swe</sub>/PS1<sup>ΔE9</sup>* mice. Alternatively, the present data may highlight the involvement of transcriptional and translational mechanisms, rather than production and clearance pathways, in the assembly of PHF tau.

A prevalence of 3R isoforms in the composition of NFTs has been observed in the AD hippocampus by immunohistochemical and biochemical methods (44). Moreover, a shift from 4R to 3R isoforms has been associated with the morphological evolution of tau-positive neurons from a pre-tangle to the NFT state (45). Although the literature on the regulation of tau isoforms in AD remains scarce, the present results support the notion that an imbalance in tau isoform ratio is involved in the neurofibrillary alterations of AD, with 3R isoforms being preferentially sequestered into the insoluble tau fraction. The identification of tau isoform-B, a 3R isoform that is predominantly expressed in the fetal mouse brain, supports the suggestion that immature tau isoforms participate in AD tauopathy (46), and implicates aberrant transcription and translation mechanisms in the disease process. A re-induction of fetal tau may be attributed to the deregulation of core splicing machinery, which was marked in this study and considered to occur early and selectively in AD (47). Moreover, as the selection of splice sites is determined by canonical sequences encoded into the genome, the re-expression of fetal isoforms might be a consequence of aberrant DNA replication during cell cycle re-entry (48). Cell cycle proteins that were deregulated in an age- and genotype-specific manner in this study include Sub1, cdc42, CEND1, Histone H3 and nucleolin (Data File S1). Clearly, the exact mechanisms underlying tauopathy in AD cannot be resolved by the present set of experiments. The data demonstrate, however, that the formation of PHF tau is associated with loss of regulatory control over *tau* splicing *in vivo*, which may have important implications for the origins and management of

tauopathy in AD. It is tempting to speculate that tau hyperphosphorylation may partly be due to the re-emergence of fetal isoforms, which are known to be over-phosphorylated compared to adult tau (49). Moreover, it is plausible that an imbalance in tau isoform ratio mediates protein mislocalization from the axonal to the somatodendritic compartment, as distinct tau isoforms are differentially sorted across the cell (50). Of note, cofilin-dependent, ‘classical’ pathways of tau missorting (51) may also be involved in the pathology observed in this study, as cofilin was reduced in the sarkosyl-insoluble proteome of 24-month-old *APP<sub>swe</sub>/PS1 $\Delta$ E9* mice. Collectively, these data highlight the relevance of amyloidosis models for studying the diverse macroscopic and molecular aspects of AD tauopathy.

The limitations associated with models overexpressing *APP* and *PSEN* mutations have been discussed previously (2). To exclude the possibility that tauopathy is an artefact of *APP* or *PSEN* overexpression, it would be important to determine whether it develops in second-generation amyloidosis models, carrying AD-related mutations in endogenous genes. Moreover, as there is evidence of [<sup>18</sup>F]Flortaucipir binding to monoamine oxidases (MAO; 52), signal quantification in the presence of MAO inhibitors is warranted to determine the extent of off-target binding, if any (53). Practical considerations in using amyloidosis mice to study tauopathy include long waiting times for the accumulation of endogenous murine tau, mouse-on-mouse antibody issues, and the low abundance of pathology as compared to human AD. While ~30% of all Nissl-positive cells in the prefrontal cortex of Braak stage V-VI brains may contain NFTs (54), Gallyas-positive signal in this study occupied ~1% of the frontal cortex of 24-month-old *APP<sub>swe</sub>/PS1 $\Delta$ E9* mice, neuritic structures included. Nevertheless, cognitive impairment in AD is known to correlate with the spread of tau pathology, and the number of brain areas containing at least one NFT has

been shown to be the best explanatory variable of intellectual status in AD (55). In this context, it is worth evaluating whether measurements of tauopathy in aging  $APP_{swel}/PS1_{\Delta E9}$  mice correlate with the progressive cognitive impairment that these animals exhibit in the Barnes maze assay (56).

## Materials and Methods

### *Study design*

Mice were grouped according to age and genotype. Sample numbers were based on preliminary studies, showing absence of Gallyas and [ $^{18}\text{F}$ ]Flortaucipir signal in 18-month-old WT vs. TG animals. (Immuno)histochemistry, autoradiography, the isolation of sarkosyl-insoluble tau, and electron microscopy studies were repeated at least three independent times. Tau Meso Scale was performed two independent times. Remaining samples were pooled and subjected to proteomics. To avoid cross-contamination during the isolation of sarkosyl-insoluble tau, glassware was washed in ultrapure de-ionized  $\text{H}_2\text{O}$  ( $\text{dH}_2\text{O}$ , Ultra Clear<sup>TM</sup>, Siemens), followed by rinses in formic acid (FA, 98-100%; Merck Millipore),  $\text{dH}_2\text{O}$ , ethanol (99%; VWR International) and  $\text{dH}_2\text{O}$ . No samples were excluded from data analysis, which was performed in an unblinded manner. To compare tau pathology in transgenic mouse vs. human brain, tissue from the middle frontal gyrus of an AD-confirmed patient [BB08-002, Female, 80 years old, *post-mortem* interval (PMI): 9 h] and a non-AD subject (BB16-023, Female, 83 years old, PMI unknown) were processed along with the murine samples for the Gallyas silver stain, autoradiography, electron microscopy and proteomics experiments. The AD and non-AD samples were chosen for their abundance and complete lack of tau pathology respectively, as assessed by Gallyas silver

staining and [<sup>18</sup>F]Flortaucipir autoradiography. To avoid confounding effects of anesthesia on tau phosphorylation, mice were euthanized by cervical dislocation.

### *Ethical statement*

Mouse tissue: All procedures complied with Danish law (Dyreværnsloven-Protection of Animals Act, nr 344/2005) and European Union directive 2010/63/EU, regulating animal research. Ethical permission was granted by the Animal Ethics Inspectorate of Denmark (nr 2011/561-1950).

Human tissue: Fresh-frozen samples from the middle frontal gyrus were obtained from the Maritime Brain Tissue Bank, Department of Medical Neuroscience, Faculty of Medicine, Dalhousie University, Sir Charles Tupper Building, 5850 College Street, Halifax Nova Scotia B3H 4R2. Ethical approval was obtained from the Nova Scotia Health Authority Research Board in Halifax, Canada, and the Danish Biomedical Research Ethical Committee of the region of Southern Denmark (Project ID: S-20070047). Informed, written consent forms were obtained for all subjects.

### *Animals and tissue sectioning*

*APP<sub>swe</sub>/PSI<sub>ΔE9</sub>* mice (57), originally purchased from the Jackson Laboratories (MMRRC Stock No: 34832-JAX), were bred and maintained on a C57BL/6J background. The animals were group-housed (4-8/cage) in a temperature (21±1°C) and humidity controlled environment (45-65%), under a 12:12 h light:dark cycle (lights on: 7 am). Food and water were available *ad libitum*. Female *APP<sub>swe</sub>/PSI<sub>ΔE9</sub>* mice were used at 3, 6, 12, and 18 months of age. Sex- and age-matched WT littermates were used as control. Both male and female mice were used in the 24-



month-old groups (n=6/genotype & age-group, total animal number: 60). The animals were euthanized by cervical dislocation, and brains immediately removed and bisected along the midline. Right hemispheres were frozen in isopentane on dry-ice (-30°C). The olfactory bulb, striatum, cortex, hippocampus, diencephalon, brainstem and cerebellum from the left hemisphere were dissected on a petri dish on ice, collected in Eppendorf® tubes, and frozen on dry-ice. The tissue was stored at -80°C until use.

Sectioning was carried out at -17°C using a Leica CM3050S cryostat (Leica Biosystems GmbH). Series of 20 µm-thick sagittal sections were collected at 300 µm intervals. The sections were mounted onto ice-cold Superfrost™ Plus slides (Thermo Fisher Scientific), dried at 4°C in a box containing silica gel for at least 2 h, and stored at -80°C for future experiments. Every 13<sup>th</sup> and 14<sup>th</sup> section was collected in Eppendorf® tubes for RNA extraction with Trizol™.

Fresh-frozen coronal brain sections of male and female, 20-month-old Tg2576 and WT mice were provided by the Centre for Biological Sciences, University of Southampton, U.K.

#### *(Immuno)histochemistry, autoradiography and proteomics*

The Gallyas silver stain was performed according to Kuninaka et al. (58), thioflavin-S according to Sun et al. (59), [<sup>18</sup>F]Flortaucipir autoradiography according to Marquié et al. (60), proteomics according to Kempf et al. (61). Protocol details are provided in Supplementary Materials and Methods.

### *Statistical analysis*

Parametric testing was employed following inspection of the data for normality with the Kolmogorov-Smirnov test in Prism (v6.01; GraphPad Software). Data sets were analyzed by Statistica™ v10 (TIBCO Software Inc., USA). The effects of age, genotype and brain region on the binding levels of [<sup>18</sup>F]Flortaucipir were analyzed by three-way ANOVA. Gallyas-positive area fraction and tau gene/protein levels were analyzed by two-way ANOVA for the independent factors age and brain region or genotype, respectively. Where ANOVA yielded significant effects, Bonferroni *post-hoc* comparisons were used to detect between-group regional and age-dependent differences. Levels of sarkosyl-insoluble tau between 24-month-old TG and WT mice, and PHF dimensions extracted from TG vs. AD brain were compared by two-tailed independent Student's t-tests. Significance was set at  $\alpha=0.05$ . A 1.3-fold change cut-off value for all TMT ratios was used to rank proteins as up- or down-regulated in the proteomics study (62).

### **Supplementary Materials**

Materials and Methods.

Fig. S1. Quantification of Gallyas-positive lesions, photomicrographs of MC-1 immunoreactivity and vascular pathology in *APP<sub>swe</sub>/PSI $\Delta$ E9* mice.

Fig. S2. Correlation between Gallyas-positive area fraction and [<sup>18</sup>F]Flortaucipir binding levels.

Fig. S3. Evaluation of methods for extracting sarkosyl-insoluble tau.

Fig. S4. pS404 immunoblot.

Table S1. Evidence of tau hyperphosphorylation in *APP<sub>swe</sub>/PSI $\Delta$ E9* mice.

Data file S1. Regulated proteins in the sarkosyl-insoluble fraction.

## References:

1. G. Esquerda-Canals, L. Montoliu-Gaya, J. Guell-Bosch, S. Villegas, Mouse Models of Alzheimer's Disease. *Journal of Alzheimer's disease : JAD* **57**, 1171-1183 (2017).
2. H. Sasaguri, P. Nilsson, S. Hashimoto, K. Nagata, T. Saito, B. De Strooper, J. Hardy, R. Vassar, B. Winblad, T. C. Saido, APP mouse models for Alzheimer's disease preclinical studies. *EMBO J* **36**, 2473-2487 (2017).
3. A. A. Babcock, L. Ilkjaer, B. H. Clausen, B. Villadsen, L. Dissing-Olesen, A. T. Bendixen, L. Lyck, K. L. Lambertsen, B. Finsen, Cytokine-producing microglia have an altered beta-amyloid load in aged APP/PS1 Tg mice. *Brain, behavior, and immunity*, (2015).
4. S. Serriere, C. Tauber, J. Vercouillie, C. Mothes, C. Pruckner, D. Guilloteau, M. Kassiou, A. Domene, L. Garreau, G. Page, S. Chalon, Amyloid load and translocator protein 18 kDa in APPswePS1-dE9 mice: a longitudinal study. *Neurobiology of aging* **36**, 1639-1652 (2015).
5. Y. Liu, M. J. Yoo, A. Savonenko, W. Stirling, D. L. Price, D. R. Borchelt, L. Mamounas, W. E. Lyons, M. E. Blue, M. K. Lee, Amyloid pathology is associated with progressive monoaminergic neurodegeneration in a transgenic mouse model of Alzheimer's disease. *The Journal of neuroscience : the official journal of the Society for Neuroscience* **28**, 13805-13814 (2008).
6. T. A. Kokjohn, A. E. Roher, Amyloid precursor protein transgenic mouse models and Alzheimer's disease: understanding the paradigms, limitations, and contributions. *Alzheimers Dement* **5**, 340-347 (2009).
7. C. Andorfer, Y. Kress, M. Espinoza, R. de Silva, K. L. Tucker, Y. A. Barde, K. Duff, P. Davies, Hyperphosphorylation and aggregation of tau in mice expressing normal human tau isoforms. *Journal of neurochemistry* **86**, 582-590 (2003).
8. J. Gotz, N. Deters, A. Doldissen, L. Bokhari, Y. Ke, A. Wiesner, N. Schonrock, L. M. Ittner, A decade of tau transgenic animal models and beyond. *Brain Pathol* **17**, 91-103 (2007).
9. D. Galimberti, E. Scarpini, Genetics of frontotemporal lobar degeneration. *Front Neurol* **3**, 52 (2012).
10. C. D. Keene, M. Darvas, B. Kraemer, D. Liggitt, C. Sigurdson, W. Ladiges, Neuropathological assessment and validation of mouse models for Alzheimer's disease: applying NIA-AA guidelines. *Pathobiol Aging Age Relat Dis* **6**, 32397 (2016).
11. B. T. Hyman, C. H. Phelps, T. G. Beach, E. H. Bigio, N. J. Cairns, M. C. Carrillo, D. W. Dickson, C. Duyckaerts, M. P. Frosch, E. Masliah, S. S. Mirra, P. T. Nelson, J. A. Schneider, D. R. Thal, B. Thies, J. Q. Trojanowski, H. V. Vinters, T. J. Montine, National Institute on Aging-Alzheimer's Association guidelines for the neuropathologic assessment of Alzheimer's disease. *Alzheimers Dement* **8**, 1-13 (2012).
12. E. Drummond, T. Wisniewski, Alzheimer's disease: experimental models and reality. *Acta Neuropathol* **133**, 155-175 (2017).
13. K. Herrup, The case for rejecting the amyloid cascade hypothesis. *Nat Neurosci* **18**, 794-799 (2015).
14. A. Metaxas, S. J. Kempf, Neurofibrillary tangles in Alzheimer's disease: elucidation of the molecular mechanism by immunohistochemistry and tau protein phospho-proteomics. *Neural Regen Res* **11**, 1579-1581 (2016).
15. J. Gotz, A. Gladbach, L. Pennanen, J. van Eersel, A. Schild, D. David, L. M. Ittner, Animal models reveal role for tau phosphorylation in human disease. *Biochim Biophys Acta* **1802**, 860-871 (2010).
16. T. Kampers, M. Pangalos, H. Geerts, H. Wiech, E. Mandelkow, Assembly of paired helical filaments from mouse tau: implications for the neurofibrillary pathology in transgenic mouse models for Alzheimer's disease. *FEBS Lett* **451**, 39-44 (1999).
17. I. C. Stancu, B. Vasconcelos, D. Terwel, I. Dewachter, Models of beta-amyloid induced Tau-pathology: the long and "folded" road to understand the mechanism. *Molecular neurodegeneration* **9**, 51 (2014).
18. S. Dutta, P. Sengupta, Men and mice: Relating their ages. *Life Sci* **152**, 244-248 (2016).
19. R. M. Cohen, K. Rezai-Zadeh, T. M. Weitz, A. Rentsendorj, D. Gate, I. Spivak, Y. Bholat, V. Vasilevko, C. G. Glabe, J. J. Breunig, P. Rakic, H. Davtyan, M. G. Agadjanyan, V. Kepe, J. R. Barrio, S. Bannykh, C. A. Szekely, R. N. Pechnick, T. Town, A transgenic Alzheimer rat with plaques, tau pathology, behavioral impairment, oligomeric abeta, and frank neuronal loss. *The Journal of neuroscience : the official journal of the Society for Neuroscience* **33**, 6245-6256 (2013).
20. N. Sahara, J. Lewis, M. DeTure, E. McGowan, D. W. Dickson, M. Hutton, S. H. Yen, Assembly of tau in transgenic animals expressing P301L tau: alteration of phosphorylation and solubility. *Journal of neurochemistry* **83**, 1498-1508 (2002).

21. S. G. Greenberg, P. Davies, A preparation of Alzheimer paired helical filaments that displays distinct tau proteins by polyacrylamide gel electrophoresis. *Proceedings of the National Academy of Sciences of the United States of America* **87**, 5827-5831 (1990).
22. C. Julien, A. Bretteville, E. Planel, Biochemical isolation of insoluble tau in transgenic mouse models of tauopathies. *Methods Mol Biol* **849**, 473-491 (2012).
23. W. Huang da, B. T. Sherman, R. A. Lempicki, Systematic and integrative analysis of large gene lists using DAVID bioinformatics resources. *Nat Protoc* **4**, 44-57 (2009).
24. W. Huang da, B. T. Sherman, R. A. Lempicki, Bioinformatics enrichment tools: paths toward the comprehensive functional analysis of large gene lists. *Nucleic Acids Res* **37**, 1-13 (2009).
25. J. C. Augustinack, A. Schneider, E. M. Mandelkow, B. T. Hyman, Specific tau phosphorylation sites correlate with severity of neuronal cytopathology in Alzheimer's disease. *Acta Neuropathol* **103**, 26-35 (2002).
26. P. T. Nelson, H. Braak, W. R. Markesbery, Neuropathology and cognitive impairment in Alzheimer disease: a complex but coherent relationship. *Journal of neuropathology and experimental neurology* **68**, 1-14 (2009).
27. M. J. Pontecorvo, M. D. Devous, Sr., M. Navitsky, M. Lu, S. Salloway, F. W. Schaerf, D. Jennings, A. K. Arora, A. McGeehan, N. C. Lim, H. Xiong, A. D. Joshi, A. Siderowf, M. A. Mintun, F. A.-A. investigators, Relationships between flortaucipir PET tau binding and amyloid burden, clinical diagnosis, age and cognition. *Brain* **140**, 748-763 (2017).
28. C. Czech, F. Grueninger, Recent advances in the treatment of Alzheimers. *Drug Discovery Today: Therapeutic Strategies* **10**, e73-e78 (2013).
29. E. D. Huey, K. T. Putnam, J. Grafman, A systematic review of neurotransmitter deficits and treatments in frontotemporal dementia. *Neurology* **66**, 17-22 (2006).
30. R. M. Tsai, A. L. Boxer, Treatment of frontotemporal dementia. *Curr Treat Options Neurol* **16**, 319 (2014).
31. F. Ubelmann, T. Burrinha, L. Salavessa, R. Gomes, C. Ferreira, N. Moreno, C. Guimas Almeida, Bin1 and CD2AP polarise the endocytic generation of beta-amyloid. *EMBO Rep* **18**, 102-122 (2017).
32. Y. A. Huang, B. Zhou, M. Wernig, T. C. Sudhof, ApoE2, ApoE3, and ApoE4 Differentially Stimulate APP Transcription and Aβ Secretion. *Cell* **168**, 427-441 e421 (2017).
33. J. Chapuis, F. Hansmannel, M. Gistelincq, A. Mounier, C. Van Cauwenberghe, K. V. Kolen, F. Geller, Y. Sottejeau, D. Harold, P. Dourlen, B. Grenier-Boley, Y. Kamatani, B. Delepine, F. Demiautte, D. Zelenika, N. Zommer, M. Hamdane, C. Bellenguez, J. F. Dartigues, J. J. Hauw, F. Letronne, A. M. Ayril, K. Sleegers, A. Schellens, L. V. Broeck, S. Engelborghs, P. P. De Deyn, R. Vandenberghe, M. O'Donovan, M. Owen, J. Epelbaum, M. Mercken, E. Karran, M. Bantscheff, G. Drewes, G. Joberty, D. Champion, J. N. Octave, C. Berr, M. Lathrop, P. Callaerts, D. Mann, J. Williams, L. Buee, I. Dewachter, C. Van Broeckhoven, P. Amouyel, D. Moechars, B. Dermaut, J. C. Lambert, G. consortium, Increased expression of BIN1 mediates Alzheimer genetic risk by modulating tau pathology. *Molecular psychiatry* **18**, 1225-1234 (2013).
34. Y. Shi, K. Yamada, S. A. Liddelow, S. T. Smith, L. Zhao, W. Luo, R. M. Tsai, S. Spina, L. T. Grinberg, J. C. Rojas, G. Gallardo, K. Wang, J. Roh, G. Robinson, M. B. Finn, H. Jiang, P. M. Sullivan, C. Baufeld, M. W. Wood, C. Sutphen, L. McCue, C. Xiong, J. L. Del-Aguila, J. C. Morris, C. Cruchaga, I. Alzheimer's Disease Neuroimaging, A. M. Fagan, B. L. Miller, A. L. Boxer, W. W. Seeley, O. Butovsky, B. A. Barres, S. M. Paul, D. M. Holtzman, ApoE4 markedly exacerbates tau-mediated neurodegeneration in a mouse model of tauopathy. *Nature* **549**, 523-527 (2017).
35. S. Calafate, W. Flavin, P. Verstreken, D. Moechars, Loss of Bin1 Promotes the Propagation of Tau Pathology. *Cell Rep* **17**, 931-940 (2016).
36. C. M. Hales, N. T. Seyfried, E. B. Dammer, D. Duong, H. Yi, M. Gearing, J. C. Troncoso, E. J. Mufson, M. Thambisetty, A. I. Levey, J. J. Lah, U1 small nuclear ribonucleoproteins (snRNPs) aggregate in Alzheimer's disease due to autosomal dominant genetic mutations and trisomy 21. *Molecular neurodegeneration* **9**, 15 (2014).
37. A. E. Roher, C. L. Maarouf, T. A. Kokjohn, Familial Presenilin Mutations and Sporadic Alzheimer's Disease Pathology: Is the Assumption of Biochemical Equivalence Justified? *Journal of Alzheimer's disease : JAD* **50**, 645-658 (2016).
38. W. D. Knight, A. A. Okello, N. S. Ryan, F. E. Turkheimer, S. Rodriguez Martinez de Llano, P. Edison, J. Douglas, N. C. Fox, D. J. Brooks, M. N. Rossor, Carbon-11-Pittsburgh compound B positron emission tomography imaging of amyloid deposition in presenilin 1 mutation carriers. *Brain* **134**, 293-300 (2011).

39. D. Sepulveda-Falla, J. Matschke, C. Bernreuther, C. Hagel, B. Puig, A. Villegas, G. Garcia, J. Zea, B. Gomez-Mancilla, I. Ferrer, F. Lopera, M. Glatzel, Deposition of hyperphosphorylated tau in cerebellum of PS1 E280A Alzheimer's disease. *Brain Pathol* **21**, 452-463 (2011).
40. M. Brendel, A. Jaworska, E. Griessinger, C. Rotzer, S. Burgold, F. J. Gildehaus, J. Carlsen, P. Cumming, K. Baumann, C. Haass, H. Steiner, P. Bartenstein, J. Herms, A. Rominger, Cross-sectional comparison of small animal [<sup>18</sup>F]-florbetaben amyloid-PET between transgenic AD mouse models. *PloS one* **10**, e0116678 (2015).
41. Y. T. Quiroz, R. A. Sperling, D. J. Norton, A. Baena, J. F. Arboleda-Velasquez, D. Cosio, A. Schultz, M. Lapoint, E. Guzman-Velez, J. B. Miller, L. A. Kim, K. Chen, P. N. Tariot, F. Lopera, E. M. Reiman, K. A. Johnson, Association Between Amyloid and Tau Accumulation in Young Adults With Autosomal Dominant Alzheimer Disease. *JAMA Neurol.* (2018).
42. B. A. Gordon, T. M. Blazey, Y. Su, A. Hari-Raj, A. Dincer, S. Flores, J. Christensen, E. McDade, G. Wang, C. Xiong, N. J. Cairns, J. Hassenstab, D. S. Marcus, A. M. Fagan, C. R. Jack, Jr., R. C. Hornbeck, K. L. Paumier, B. M. Ances, S. B. Berman, A. M. Brickman, D. M. Cash, J. P. Chhatwal, S. Correia, S. Forster, N. C. Fox, N. R. Graff-Radford, C. la Fougere, J. Levin, C. L. Masters, M. N. Rossor, S. Salloway, A. J. Saykin, P. R. Schofield, P. M. Thompson, M. M. Weiner, D. M. Holtzman, M. E. Raichle, J. C. Morris, R. J. Bateman, T. L. S. Benzinger, Spatial patterns of neuroimaging biomarker change in individuals from families with autosomal dominant Alzheimer's disease: a longitudinal study. *Lancet Neurol* **17**, 241-250 (2018).
43. K. Iqbal, F. Liu, C. X. Gong, I. Grundke-Iqbal, Tau in Alzheimer disease and related tauopathies. *Current Alzheimer research* **7**, 656-664 (2010).
44. M. Espinoza, R. de Silva, D. W. Dickson, P. Davies, Differential incorporation of tau isoforms in Alzheimer's disease. *Journal of Alzheimer's disease : JAD* **14**, 1-16 (2008).
45. M. Hara, K. Hirokawa, S. Kamei, T. Uchihara, Isoform transition from four-repeat to three-repeat tau underlies dendrosomatic and regional progression of neurofibrillary pathology. *Acta Neuropathol* **125**, 565-579 (2013).
46. K. S. Kosik, L. D. Orecchio, S. Bakalis, R. L. Neve, Developmentally regulated expression of specific tau sequences. *Neuron* **2**, 1389-1397 (1989).
47. B. Bai, C. M. Hales, P. C. Chen, Y. Gozal, E. B. Dammer, J. J. Fritz, X. Wang, Q. Xia, D. M. Duong, C. Street, G. Cantero, D. Cheng, D. R. Jones, Z. Wu, Y. Li, I. Diner, C. J. Heilman, H. D. Rees, H. Wu, L. Lin, K. E. Szulwach, M. Gearing, E. J. Mufson, D. A. Bennett, T. J. Montine, N. T. Seyfried, T. S. Wingo, Y. E. Sun, P. Jin, J. Hanfelt, D. M. Willcock, A. Levey, J. J. Lah, J. Peng, U1 small nuclear ribonucleoprotein complex and RNA splicing alterations in Alzheimer's disease. *Proceedings of the National Academy of Sciences of the United States of America* **110**, 16562-16567 (2013).
48. D. Kim, L. H. Tsai, Linking cell cycle reentry and DNA damage in neurodegeneration. *Annals of the New York Academy of Sciences* **1170**, 674-679 (2009).
49. G. T. Bramblett, M. Goedert, R. Jakes, S. E. Merrick, J. Q. Trojanowski, V. M. Lee, Abnormal tau phosphorylation at Ser396 in Alzheimer's disease recapitulates development and contributes to reduced microtubule binding. *Neuron* **10**, 1089-1099 (1993).
50. C. Liu, J. Gotz, Profiling murine tau with 0N, 1N and 2N isoform-specific antibodies in brain and peripheral organs reveals distinct subcellular localization, with the 1N isoform being enriched in the nucleus. *PloS one* **8**, e84849 (2013).
51. H. Zempel, F. J. A. Dennissen, Y. Kumar, J. Luedtke, J. Biernat, E. M. Mandelkow, E. Mandelkow, Axodendritic sorting and pathological missorting of Tau are isoform-specific and determined by axon initial segment architecture. *J Biol Chem* **292**, 12192-12207 (2017).
52. C. Vermeiren, P. Motte, D. Viot, G. Mairet-Coello, J. P. Courade, M. Citron, J. Mercier, J. Hannestad, M. Gillard, The tau positron-emission tomography tracer AV-1451 binds with similar affinities to tau fibrils and monoamine oxidases. *Mov Disord* **33**, 273-281 (2018).
53. A. K. Hansen, D. J. Brooks, P. Borghammer, MAO-B Inhibitors Do Not Block In Vivo Flortaucipir([<sup>18</sup>F]-AV-1451) Binding. *Mol Imaging Biol* **20**, 356-360 (2018).
54. T. Bussiere, G. Gold, E. Kovari, P. Giannakopoulos, C. Bouras, D. P. Perl, J. H. Morrison, P. R. Hof, Stereologic analysis of neurofibrillary tangle formation in prefrontal cortex area 9 in aging and Alzheimer's disease. *Neuroscience* **117**, 577-592 (2003).
55. C. Duyckaerts, M. Benneicib, Y. Grignon, T. Uchihara, Y. He, F. Piette, J. J. Hauw, Modeling the relation between neurofibrillary tangles and intellectual status. *Neurobiology of aging* **18**, 267-273 (1997).

56. A. Metaxas, R. Vaitheeswaran, S. Li, K. L. Lambertsen, B. Finsen, Modeling progressive cognitive impairment in the APP<sup>swe</sup>/PS1<sup>dE9</sup> mouse model of amyloidosis by using the Barnes maze test. Program No. 012.02. 2017 Neuroscience Meeting Planner. Washington, DC: *Society for Neuroscience*, 2017. Online.
57. J. L. Jankowsky, D. J. Fadale, J. Anderson, G. M. Xu, V. Gonzales, N. A. Jenkins, N. G. Copeland, M. K. Lee, L. H. Younkin, S. L. Wagner, S. G. Younkin, D. R. Borchelt, Mutant presenilins specifically elevate the levels of the 42 residue beta-amyloid peptide in vivo: evidence for augmentation of a 42-specific gamma secretase. *Hum Mol Genet* **13**, 159-170 (2004).
58. N. Kuninaka, M. Kawaguchi, M. Ogawa, A. Sato, K. Arima, S. Murayama, Y. Saito, Simplification of the modified Gallyas method. *Neuropathology* **35**, 10-15 (2015).
59. A. Sun, X. V. Nguyen, G. Bing, Comparative analysis of an improved thioflavin-s stain, Gallyas silver stain, and immunohistochemistry for neurofibrillary tangle demonstration on the same sections. *J Histochem Cytochem* **50**, 463-472 (2002).
60. M. Marquie, M. D. Normandin, C. R. Vanderburg, I. M. Costantino, E. A. Bien, L. G. Rycyna, W. E. Klunk, C. A. Mathis, M. D. Ikonovic, M. L. Debnath, N. Vasdev, B. C. Dickerson, S. N. Gomperts, J. H. Growdon, K. A. Johnson, M. P. Frosch, B. T. Hyman, T. Gomez-Isla, Validating novel tau positron emission tomography tracer [F-18]-AV-1451 (T807) on postmortem brain tissue. *Annals of neurology* **78**, 787-800 (2015).
61. S. J. Kempf, A. Metaxas, M. Ibanez-Vea, S. Darvesh, B. Finsen, M. R. Larsen, An integrated proteomics approach shows synaptic plasticity changes in an APP/PS1 Alzheimer's mouse model. *Oncotarget* **7**, 33627-33648 (2016).
62. S. J. Kempf, A. Casciati, S. Buratovic, D. Janik, C. von Toerne, M. Ueffing, F. Neff, S. Moertl, B. Stenerlow, A. Saran, M. J. Atkinson, P. Eriksson, S. Pazzaglia, S. Tapio, The cognitive defects of neonatally irradiated mice are accompanied by changed synaptic plasticity, adult neurogenesis and neuroinflammation. *Molecular neurodegeneration* **9**, 57 (2014).
63. E. W. Deutsch, A. Csordas, Z. Sun, A. Jarnuczak, Y. Perez-Riverol, T. Ternent, D. S. Campbell, M. Bernal-Llinares, S. Okuda, S. Kawano, R. L. Moritz, J. J. Carver, M. Wang, Y. Ishihama, N. Bandeira, H. Hermjakob, J. A. Vizcaino, The ProteomeXchange consortium in 2017: supporting the cultural change in proteomics public data deposition. *Nucleic Acids Res* **45**, D1100-D1106 (2017).
64. J. A. Vizcaino, A. Csordas, N. del-Toro, J. A. Dianes, J. Griss, I. Lavidas, G. Mayer, Y. Perez-Riverol, F. Reisinger, T. Ternent, Q. W. Xu, R. Wang, H. Hermjakob, 2016 update of the PRIDE database and its related tools. *Nucleic Acids Res* **44**, D447-456 (2016).
65. F. Gallyas, Silver staining of Alzheimer's neurofibrillary changes by means of physical development. *Acta Morphol Acad Sci Hung* **19**, 1-8 (1971).
66. T. M. Shoup, D. L. Yokell, P. A. Rice, R. N. Jackson, E. Livni, K. A. Johnson, T. J. Brady, N. Vasdev, A concise radiosynthesis of the tau radiopharmaceutical, [(18) F]T807. *J Labelled Comp Radiopharm* **56**, 736-740 (2013).
67. K. Engholm-Keller, P. Birck, J. Storling, F. Pociot, T. Mandrup-Poulsen, M. R. Larsen, TiSH--a robust and sensitive global phosphoproteomics strategy employing a combination of TiO<sub>2</sub>, SIMAC, and HILIC. *J Proteomics* **75**, 5749-5761 (2012).
68. M. R. Larsen, S. S. Jensen, L. A. Jakobsen, N. H. Heegaard, Exploring the sialome using titanium dioxide chromatography and mass spectrometry. *Mol Cell Proteomics* **6**, 1778-1787 (2007).
69. D. E. McNulty, R. S. Annan, Hydrophilic interaction chromatography reduces the complexity of the phosphoproteome and improves global phosphopeptide isolation and detection. *Mol Cell Proteomics* **7**, 971-980 (2008).
70. M. N. Melo-Braga, M. Ibanez-Vea, M. R. Larsen, K. Kulej, Comprehensive protocol to simultaneously study protein phosphorylation, acetylation, and N-linked sialylated glycosylation. *Methods Mol Biol* **1295**, 275-292 (2015).
71. M. Morris, G. M. Knudsen, S. Maeda, J. C. Trinidad, A. Ioanoviciu, A. L. Burlingame, L. Mucke, Tau post-translational modifications in wild-type and human amyloid precursor protein transgenic mice. *Nat Neurosci* **18**, 1183-1189 (2015).
72. M. Grebing, H. H. Nielsen, C. D. Fenger, T. J. K, C. U. von Linstow, B. H. Clausen, M. Soderman, K. L. Lambertsen, M. Thomassen, T. A. Kruse, B. Finsen, Myelin-specific T cells induce interleukin-1beta expression in lesion-reactive microglial-like cells in zones of axonal degeneration. *Glia* **64**, 407-424 (2016).

73. P. McMillan, E. Korvatska, P. Poorkaj, Z. Evstafjeva, L. Robinson, L. Greenup, J. Leverenz, G. D. Schellenberg, I. D'Souza, Tau isoform regulation is region- and cell-specific in mouse brain. *J Comp Neurol* **511**, 788-803 (2008).
74. G. Paxinos, K. B. J. Franklin, *The mouse brain in stereotaxic coordinates*. (Academic Press, San Diego, ed. 2nd, 2001).
75. A. Metaxas, R. Vaitheeswaran, K. T. Jensen, C. Thygesen, L. Ilkjaer, S. Darvesh, B. Finsen, Reduced Serotonin Transporter Levels and Inflammation in the Midbrain Raphe of 12 Month Old APPsw/PSEN1dE9 Mice. *Current Alzheimer research* **15**, 420-428 (2018).
76. C. Li, X. D. Guo, M. Lei, J. Y. Wu, J. Z. Jin, X. F. Shi, Z. Y. Zhu, V. Rukachaisirikul, L. H. Hu, T. Q. Wen, X. Shen, Thamnolia vermicularis extract improves learning ability in APP/PS1 transgenic mice by ameliorating both Abeta and Tau pathologies. *Acta Pharmacol Sin* **38**, 9-28 (2017).
77. C. Tapia-Rojas, F. Aranguiz, L. Varela-Nallar, N. C. Inestrosa, Voluntary Running Attenuates Memory Loss, Decreases Neuropathological Changes and Induces Neurogenesis in a Mouse Model of Alzheimer's Disease. *Brain Pathol* **26**, 62-74 (2016).
78. T. Li, K. E. Braunstein, J. Zhang, A. Lau, L. Sibener, C. Deeble, P. C. Wong, The neuritic plaque facilitates pathological conversion of tau in an Alzheimer's disease mouse model. *Nature communications* **7**, 12082 (2016).
79. X. T. Huang, Z. M. Qian, X. He, Q. Gong, K. C. Wu, L. R. Jiang, L. N. Lu, Z. J. Zhu, H. Y. Zhang, W. H. Yung, Y. Ke, Reducing iron in the brain: a novel pharmacologic mechanism of huperzine A in the treatment of Alzheimer's disease. *Neurobiology of aging* **35**, 1045-1054 (2014).
80. E. Barbero-Camps, A. Fernandez, L. Martinez, J. C. Fernandez-Checa, A. Colell, APP/PS1 mice overexpressing SREBP-2 exhibit combined Abeta accumulation and tau pathology underlying Alzheimer's disease. *Hum Mol Genet* **22**, 3460-3476 (2013).
81. I. Carrera, I. Etcheverria, L. Fernandez-Novoa, V. Lombardi, R. Cacabelos, C. Vigo, Vaccine Development to Treat Alzheimer's Disease Neuropathology in APP/PS1 Transgenic Mice. *Int J Alzheimers Dis* **2012**, 376138 (2012).
82. G. I. Cancino, K. Perez de Arce, P. U. Castro, E. M. Toledo, R. von Bernhardt, A. R. Alvarez, c-Abl tyrosine kinase modulates tau pathology and Cdk5 phosphorylation in AD transgenic mice. *Neurobiology of aging* **32**, 1249-1261 (2011).
83. N. C. Inestrosa, C. Tapia-Rojas, T. N. Griffith, F. J. Carvajal, M. J. Benito, A. Rivera-Dicter, A. R. Alvarez, F. G. Serrano, J. L. Hancke, P. V. Burgos, J. Parodi, L. Varela-Nallar, Tetrahydroperforin prevents cognitive deficit, Abeta deposition, tau phosphorylation and synaptotoxicity in the APPsw/PSEN1DeltaE9 model of Alzheimer's disease: a possible effect on APP processing. *Transl Psychiatry* **1**, e20 (2011).
84. Y. Ding, A. Qiao, Z. Wang, J. S. Goodwin, E. S. Lee, M. L. Block, M. Allsbrook, M. P. McDonald, G. H. Fan, Retinoic acid attenuates beta-amyloid deposition and rescues memory deficits in an Alzheimer's disease transgenic mouse model. *The Journal of neuroscience : the official journal of the Society for Neuroscience* **28**, 11622-11634 (2008).
85. M. Ettcheto, E. Sanchez-Lopez, L. Pons, O. Busquets, J. Olloquequi, C. Beas-Zarate, M. Pallas, M. L. Garcia, C. Auladell, J. Folch, A. Camins, Dexibuprofen prevents neurodegeneration and cognitive decline in APPsw/PS1dE9 through multiple signaling pathways. *Redox Biol* **13**, 345-352 (2017).
86. X. L. Bu, Y. Xiang, W. S. Jin, J. Wang, L. L. Shen, Z. L. Huang, K. Zhang, Y. H. Liu, F. Zeng, J. H. Liu, H. L. Sun, Z. Q. Zhuang, S. H. Chen, X. Q. Yao, B. Giunta, Y. C. Shan, J. Tan, X. W. Chen, Z. F. Dong, H. D. Zhou, X. F. Zhou, W. Song, Y. J. Wang, Blood-derived amyloid-beta protein induces Alzheimer's disease pathologies. *Molecular psychiatry*, (2017).
87. S. H. Yang, D. K. Lee, J. Shin, S. Lee, S. Baek, J. Kim, H. Jung, J. M. Hah, Y. Kim, Nec-1 alleviates cognitive impairment with reduction of Abeta and tau abnormalities in APP/PS1 mice. *EMBO Mol Med* **9**, 61-77 (2017).
88. J. Zhang, S. Wang, W. Huang, D. A. Bennett, D. W. Dickson, D. Wang, R. Wang, Tissue Transglutaminase and Its Product Isopeptide Are Increased in Alzheimer's Disease and APPsw/PS1dE9 Double Transgenic Mice Brains. *Mol Neurobiol* **53**, 5066-5078 (2016).
89. Y. Du, J. Qu, W. Zhang, M. Bai, Q. Zhou, Z. Zhang, Z. Li, J. Miao, Morin reverses neuropathological and cognitive impairments in APPsw/PS1dE9 mice by targeting multiple pathogenic mechanisms. *Neuropharmacology* **108**, 1-13 (2016).
90. S. Jeon, J. E. Park, J. Lee, Q. F. Liu, H. J. Jeong, S. C. Pak, S. Yi, M. H. Kim, C. W. Kim, J. K. Park, G. W. Kim, B. S. Koo, Illite improves memory impairment and reduces Abeta level in the Tg-APPsw/PS1dE9

- mouse model of Alzheimers disease through Akt/CREB and GSK-3beta phosphorylation in the brain. *J Ethnopharmacol* **160**, 69-77 (2015).
91. J. Y. Vargas, J. Ahumada, M. S. Arrazola, M. Fuenzalida, N. C. Inestrosa, WASP-1, a canonical Wnt signaling potentiator, rescues hippocampal synaptic impairments induced by Abeta oligomers. *Experimental neurology* **264**, 14-25 (2015).
  92. Q. Zhou, M. Wang, Y. Du, W. Zhang, M. Bai, Z. Zhang, Z. Li, J. Miao, Inhibition of c-Jun N-terminal kinase activation reverses Alzheimer disease phenotypes in APPsw/PS1dE9 mice. *Annals of neurology* **77**, 637-654 (2015).
  93. I. Pedros, D. Petrov, M. Allgaier, F. Sureda, E. Barroso, C. Beas-Zarate, C. Auladell, M. Pallas, M. Vazquez-Carrera, G. Casadesus, J. Folch, A. Camins, Early alterations in energy metabolism in the hippocampus of APPsw/PS1dE9 mouse model of Alzheimer's disease. *Biochim Biophys Acta* **1842**, 1556-1566 (2014).
  94. E. Aso, S. Juves, R. Maldonado, I. Ferrer, CB2 cannabinoid receptor agonist ameliorates Alzheimer-like phenotype in AbetaPP/PS1 mice. *Journal of Alzheimer's disease : JAD* **35**, 847-858 (2013).
  95. E. Aso, S. Lomoio, I. Lopez-Gonzalez, L. Joda, M. Carmona, N. Fernandez-Yague, J. Moreno, S. Juves, A. Pujol, R. Pamplona, M. Portero-Otin, V. Martin, M. Diaz, I. Ferrer, Amyloid generation and dysfunctional immunoproteasome activation with disease progression in animal model of familial Alzheimer's disease. *Brain Pathol* **22**, 636-653 (2012).
  96. L. Li, T. Cheung, J. Chen, K. Herrup, A comparative study of five mouse models of Alzheimer's disease: cell cycle events reveal new insights into neurons at risk for death. *Int J Alzheimers Dis* **2011**, 171464 (2011).
  97. C. Wei, W. Zhang, Q. Zhou, C. Zhao, Y. Du, Q. Yan, Z. Li, J. Miao, Mithramycin A Alleviates Cognitive Deficits and Reduces Neuropathology in a Transgenic Mouse Model of Alzheimer's Disease. *Neurochem Res* **41**, 1924-1938 (2016).
  98. D. Porquet, P. Andres-Benito, C. Grinan-Ferre, A. Camins, I. Ferrer, A. M. Canudas, J. Del Valle, M. Pallas, Amyloid and tau pathology of familial Alzheimer's disease APP/PS1 mouse model in a senescence phenotype background (SAMP8). *Age (Dordr)* **37**, 9747 (2015).
  99. J. J. Ramos-Rodriguez, O. Ortiz-Barajas, C. Gamero-Carrasco, P. R. de la Rosa, C. Infante-Garcia, N. Zopeque-Garcia, A. M. Lechuga-Sancho, M. Garcia-Alloza, Prediabetes-induced vascular alterations exacerbate central pathology in APPsw/PS1dE9 mice. *Psychoneuroendocrinology* **48**, 123-135 (2014).
  100. J. Q. Shi, B. R. Wang, Y. Y. Tian, J. Xu, L. Gao, S. L. Zhao, T. Jiang, H. G. Xie, Y. D. Zhang, Antiepileptics topiramate and levetiracetam alleviate behavioral deficits and reduce neuropathology in APPsw/PS1dE9 transgenic mice. *CNS Neurosci Ther* **19**, 871-881 (2013).
  101. J. J. Ramos-Rodriguez, S. Molina-Gil, R. Rey-Brea, E. Berrocoso, M. Garcia-Alloza, Specific serotonergic denervation affects tau pathology and cognition without altering senile plaques deposition in APP/PS1 mice. *PLoS one* **8**, e79947 (2013).
  102. S. Lomoio, I. Lopez-Gonzalez, E. Aso, M. Carmona, B. Torrejon-Escribano, E. Scherini, I. Ferrer, Cerebellar amyloid-beta plaques: disturbed cortical circuitry in AbetaPP/PS1 transgenic mice as a model of familial Alzheimer's disease. *Journal of Alzheimer's disease : JAD* **31**, 285-300 (2012).
  103. Y. S. Hu, P. Xu, G. Pigino, S. T. Brady, J. Larson, O. Lazarov, Complex environment experience rescues impaired neurogenesis, enhances synaptic plasticity, and attenuates neuropathology in familial Alzheimer's disease-linked APPsw/PS1DeltaE9 mice. *FASEB J* **24**, 1667-1681 (2010).
  104. M. Demars, Y. S. Hu, A. Gadadhar, O. Lazarov, Impaired neurogenesis is an early event in the etiology of familial Alzheimer's disease in transgenic mice. *J Neurosci Res* **88**, 2103-2117 (2010).



**Acknowledgments:** We thank Andrew Reid, senior technician and manager of the Maritime Brain Tissue Bank, for organizing the transportation of human tissue. We acknowledge the Core Facility for Integrated Microscopy, Faculty of Health and Medical Sciences, University of Copenhagen, for assisting with TEM. The Villum Center for Bioanalytical Sciences at SDU is acknowledged for supporting the proteomics part of the study. Precursor material for the synthesis of [<sup>18</sup>F]Flortaucipir was generously supplied by AVID Radiopharmaceuticals, Philadelphia, PA, USA.

**Funding:** This work was supported by SDU2020 (CoPING AD: Collaborative Project on the Interaction between Neurons and Glia in AD) and the A.P. Møller og Hustru Chastine Mc-Kinney Møllers Fond.

**Author contributions:** AM designed the project and wrote the manuscript, performed (immuno)histochemistry, autoradiography, tau isolation studies, and assisted with TEM. CT and SJK performed proteomics and immunoblotting. MA and RV performed tissue sectioning, (immuno)histochemistry, autoradiography and tau filament analysis. SP performed PCR and tau Meso Scale. AML organized and performed autoradiography. HA synthesized [<sup>18</sup>F]Flortaucipir. JLT performed (immuno)histochemistry and provided Tg2576 tissue, SD provided human tissues and critically reviewed the manuscript. DJB, MRL and BF supervised the project and contributed to its design. All authors assisted with data interpretation, participated in drafting the manuscript and approved its final version.

**Competing interests:** None related to the design and completion of this study.

**Data and materials availability:** The proteomics data have been deposited to the ProteomeXchange Consortium (63) via the PRIDE partner repository with the dataset identifier

PXD009306 [username: reviewer39090@ebi.ac.uk; password: HdJxxVxU (64)]. The MC-1 antibody, and material for the synthesis of [<sup>18</sup>F]Flortaucipir were obtained through an MTA.

## Supplementary Materials:

### Materials and Methods

#### *Gallyas silver staining*

The Kuninaka et al. simplification of the modified Gallyas method was used to examine neurofibrillary pathology (58, 65). Fresh-frozen sections were directly immersed in 4% neutral buffered formalin (NBF) at 4°C for 24 h. The sections were thoroughly washed in ultrapure deionized H<sub>2</sub>O (dH<sub>2</sub>O; Ultra Clear<sup>TM</sup>, Siemens), dried at room temperature (RT) for 10 min and defatted for 1 h in a solution of chloroform/99% ethanol (1:1) in the dark. Following hydration through a series of graded ethanols into dH<sub>2</sub>O (2 x 1 min: 99%, 96%, 70%), slides were immersed into an aqueous solution of 0.25% potassium permanganate (20 min), washed in dH<sub>2</sub>O (1 min), and incubated in 1% oxalic acid (2 min). After washing in dH<sub>2</sub>O (2 x 5 min), sections were transferred into the alkaline silver iodide solution (1 min), washed with 0.5% acetic acid (2 x 5 min), and developed in a water bath at 15°C, until the appearance of a brownish shade (12-14 min). The developed sections were washed in 0.5% acetic acid (3 min), toned with 0.1% gold chloride (10 min), fixed with 1% sodium thiosulfate (5 min), and counterstained with 0.1% nuclear fast red (3 min). Ethanol and chloroform were from VWR International. The remaining chemicals were from Sigma-Aldrich Co.

#### *A $\beta$ immunohistochemistry on silver-stained sections*

The biotinylated 6E10 antibody (SIG-39340, Nordic BioSite) was used to investigate the association between neurofibrillary pathology and A $\beta$  load in *APP<sub>swe</sub>/PS1 $\Delta$ E9* mice. Clone 6E10 is raised against amino acids 1-16 of human A $\beta$ , recognizing multiple amyloid peptides and precursor forms (manufacturer information). Silver-stained sections were immersed in 70%

formic acid for 30 min, rinsed for 10 min in 50 mM Tris-buffered saline (TBS, pH 7.4), and further washed/permeabilised in TBS containing 1% Triton X-100 (3 x 15 min). Sections were subsequently blocked for 30 min in TBS, containing 10% fetal bovine serum (FBS). Incubation with the 6E10 anti- $\beta$ -amyloid antibody was carried out overnight at 4°C, in TBS containing 10% FBS (1:500 dilution of stock). Adjacent, negative control sections were incubated with biotin-labeled mouse IgG1 (MG115, Thermo Fisher Scientific), diluted to the same protein concentration as the primary antibody. Following incubation with 6E10, the sections were adjusted to RT for 30 min and washed in TBS+1% Triton X-100 (3 x 15 min). Endogenous peroxidase activity was quenched for 20 min in a solution of TBS/methanol/H<sub>2</sub>O<sub>2</sub> (8:1:1). After washing in TBS+1% Triton X-100 (3 x 15 min), sections were incubated for 3 h with HRP-streptavidin in TBS/10% FBS (1:200; GE Healthcare Life Sciences). After a final wash in TBS (3 x 10 min), peroxidase activity was visualised with 0.05% 3,3'-diaminobenzidine (DAB) in TBS buffer, containing 0.01% H<sub>2</sub>O<sub>2</sub> (Sigma Aldrich Co.).

### *MC-1 immunohistochemistry*

Fresh-frozen sections were directly immersed in 4% NBF at 4°C for 24 h. The sections were thoroughly washed in dH<sub>2</sub>O, dried at RT for 10 min, and defatted for 1 h in a solution of chloroform/99% ethanol (1:1) in the dark. Following hydration through a series of graded ethanols into dH<sub>2</sub>O (2 x 1 min: 99%, 96%, 70%), endogenous peroxidase activity was quenched for 30 min with 1.5% H<sub>2</sub>O<sub>2</sub> in TBS. The sections were washed and blocked for 1 h at RT using 10% FBS in 0.05% Triton X-100 (TBS-Tx; blocking buffer). The mouse anti-human MC-1 antibody, a generous gift from Dr. Peter Davies, was diluted in blocking buffer (1:10 dilution of stock). Negative control sections were incubated in blocking buffer with mouse IgG1 (1:100;

MG100, Thermo Fisher Scientific). Following overnight incubation at 4°C, the sections were washed in TBS-Tx (4 x 5 min) and incubated at RT for 3 h with biotin-labeled goat anti-mouse IgG1 (abcam, ab97238), diluted 1:300 in TBS-Tx, containing 50% Superblock (Thermo Fisher Scientific; #37580). After washing in TBS-Tx (4 x 5 min), sections were incubated for 1 h with HRP-streptavidin, diluted 1:200 in TBS-Tx containing 50% Superblock. The sections were washed in TBS (4 x 5 min) and developed with 50 mg DAB and 0.01% H<sub>2</sub>O<sub>2</sub>, in TBS containing 10 mM imidazole and 0.5% nickel ammonium hexahydrate (pH 7.4).

For all light microscopy studies, the developed sections were thoroughly washed in dH<sub>2</sub>O, dehydrated in graded alcohols, cleared in xylene, and cover-slipped with PERTEX<sup>®</sup> (Histolab Products AB).

#### *Thioflavin-S staining*

Thioflavin-S staining was performed according to Sun et al. (59). Fresh-frozen sections were directly immersed in 4% NBF at 4°C for 24 h. The sections were thoroughly washed in ultrapure dH<sub>2</sub>O, dried at RT for 10 min, and defatted for 1 h in a solution of chloroform/99% ethanol (1:1) in the dark. Following hydration through a series of graded ethanols into dH<sub>2</sub>O (2 x 1 min: 99%, 96%, 70%), slides were immersed into an aqueous solution of 0.25% potassium permanganate (5 min), washed in dH<sub>2</sub>O (1 min), and incubated in 1% oxalic acid (2 min). After washing in dH<sub>2</sub>O (2 x 2.5 min), the sections were incubated with freshly-prepared 0.25% NaBH<sub>4</sub> (2 x 5 min), washed in dH<sub>2</sub>O (5 x 2 min), and transferred into a 0.1% thioflavin-S solution (8 min; dark incubation). The sections were differentiated in 80% ethanol (2 x 10 s), washed in dH<sub>2</sub>O (3 x 5 dips), and incubated for 30 min at 4°C in the dark with high-concentration phosphate buffer, to

prevent photobleaching (411 mM NaCl, 8.1 mM KCl, 30 mM Na<sub>2</sub>HPO<sub>4</sub>; 5.2 mM KH<sub>2</sub>PO<sub>4</sub>). Following a dip in dH<sub>2</sub>O, the sections were counterstained with DAPI (30 μM) for 10 min and mounted with Aquatex<sup>®</sup> mounting medium (Sigma Aldrich Co.).

Immuno(histochemistry) images were acquired with an Olympus DP71 digital camera, mounted on an Olympus BX51 microscope equipped for Epi-Fluorescence illumination, or an Olympus DP80 Dual Monochrome CCD camera, mounted on a motorized BX63 Olympus microscope.

### *[<sup>18</sup>F]Flortaucipir autoradiography*

Autoradiography experiments were conducted at the Department of Nuclear Medicine and PET-centre, Aarhus University, Denmark. [<sup>18</sup>F]Flortaucipir was synthesised in Aarhus using previously detailed methods (66).

[<sup>18</sup>F]Flortaucipir autoradiography was performed as described previously (60), with minor modifications. Sections were thawed to RT for 20 min and fixed/permeabilised in 100% methanol for 20 min. The sections were incubated for a period of 60 min in a 160 mL bath of 10 mM phosphate buffered saline (PBS, pH 7.4), containing 38.4±9.6 MBq [<sup>18</sup>F]Flortaucipir (specific activity: 145±68 GBq/μmol). A series of adjacent brain sections was incubated with identical amounts of radioligand in the presence of 50 μM ‘cold’ flortaucipir, to assess non-specific binding (NSB). Following incubation, sections were serially washed in PBS (1 min), 70% ethanol in PBS (2 x 1min), 30% ethanol in PBS (1 min) and PBS (1 min). After rapid drying under a stream of cold air, the sections were placed in light-tight cassettes and exposed against FUJI multi-sensitive phosphor screens for 30 min (BAS-IP SR2025, GE Healthcare Life

Sciences). To allow quantification, standards of known radioactive concentration were prepared by serial dilution of the [ $^{18}\text{F}$ ]Flortaucipir incubation solution, and exposed along with the sections. Images were developed in a BAS-5000 phosphor-imager at 25  $\mu\text{m}$  resolution.

For image analysis, the intensity values produced by the  $^{18}\text{F}$  standards were entered with their corresponding radioactivity values (kBq/mL) into a calibration table, and the relationship between radioactivity and intensity determined by using ImageJ software (v. 1.51c; National Institutes of Health, USA). Adjustments were undertaken to allow for the radioactive decay of [ $^{18}\text{F}$ ]Flortaucipir. Values of specific binding were derived after subtraction of NSB from total binding images.

#### *Isolation of sarkosyl-insoluble Tau*

The general procedure by Greenberg and Davies (21) was used to isolate PHFs. Left brain hemispheres from two mice per group were pooled and weighed ( $467.1 \pm 3.1$  mg). The tissue was thoroughly homogenised with a motor driven Potter-Elvehjem tissue grinder (WHEATON), in a 5-fold excess (v/w) of 10 mM Tris-HCl buffer (pH 7.4), containing 800 mM NaCl, 1 mM EGTA, 10% sucrose, protease inhibitors (cOmplete<sup>TM</sup> Protease Inhibitor; Roche Diagnostics) and phosphatase inhibitors (PhosSTOP<sup>TM</sup>; Roche Diagnostics; H buffer). The homogenate was centrifuged at 4°C for 20 min in a refrigerated ultracentrifuge (27,000 x g; Sorvall RC M150 GX). The supernatant was decanted and kept on ice, the pellet (P1) suspended in 5 vol of H-buffer and re-centrifuged at 27,000 x g for 20 min (4°C). The combined supernatants (S1) were brought to 1% sarkosyl in H buffer and incubated for 2 h at 37°C in a C24 incubator shaker (100 rpm; New Brunswick Scientific). Following centrifugation at 200,000 x g for 40 min (4°C), the

sarkosyl-soluble fraction was decanted and kept on ice, and the sarkosyl-insoluble pellet suspended in H buffer, containing 1% CHAPS hydrate (Sigma Aldrich Co.). After filtering through acetate cellulose filters (0.45  $\mu\text{m}$ ; VWR International), the filtrates were centrifuged at 200,000 g for 70 min, and the final pellet suspended in 250  $\mu\text{L}$  dH<sub>2</sub>O. Aliquots of 150  $\mu\text{L}$  from the P1, S1, sarkosyl soluble and insoluble fractions were kept for determining Tau protein levels. Samples were stored at -80°C until further processed.

#### *Tau Meso Scale*

Tau protein concentration in soluble and insoluble fractions was measured with the mouse Total Tau kit (K151DSD-1; Mesoscale Diagnostics LLC). The anti-mouse monoclonal antibody used for detection binds between amino acids 150-200 of Tau, but the clone number and exact epitope recognition site(s) are proprietary. Plates were processed in a SECTOR<sup>®</sup> Imager 6000 plate reader (Meso Scale Diagnostics LLC), and data acquired with Discovery Workbench software (v.4.0; Meso Scale Diagnostics LLC). Results are presented as pg of Tau/mg of total protein, the latter measured at A562 nm with a Pierce<sup>™</sup> BCA protein kit and bovine serum albumin as standard (Thermo Fisher Scientific).

#### *Transmission electron microscopy (TEM)*

Electron microscopy was performed in the Core Facility for Integrated Microscopy, Faculty of Health and Medical Sciences, University of Copenhagen, Denmark. Carbon-coated copper grids (200 mesh; Ted Pella Inc.) were glow-discharged with a Leica EM ACE 200 (Leica Biosystems Nussloch GmbH), and loaded with 6  $\mu\text{L}$  of sarkosyl-insoluble sample. The sample was adsorbed for 1 min, blotted and stained with 2% phosphotungstic acid in dH<sub>2</sub>O for 2 min. After blotting



and a quick wash with dH<sub>2</sub>O, the samples were examined with a Philips CM 100 TEM (Koninklijke Philips N.V.), operated at an accelerating voltage of 80 kV. Digital images were acquired at a nominal magnification of x180,000, by using an OSIS Veleta digital slow scan 2k x 2k CCD camera and the iTEM software package (Olympus Corporation). Filaments shorter and longer than 200  $\mu$ m were analyzed in at least two fields of view with ImageJ software. Reported values are mean  $\pm$  SEM of 70 and 32 PHFs for *APP<sub>swe</sub>/PSI $\Delta$ E9* and AD tissue, respectively.

### *Mass spectrometry-based proteomics*

#### Reduction, alkylation and enzymatic digestion

Sarkosyl-insoluble samples were dried down and denatured at RT with 6 M Urea, 2 M Thiourea and 10 mM dithiothreitol (DTT; Sigma-Aldrich Co.) in dH<sub>2</sub>O (pH 7.5), supplemented with cOmplete<sup>TM</sup> protease inhibitors and PhosSTOP<sup>TM</sup> phosphatase inhibitors (Roche Diagnostics). After vortexing and sonication, 100  $\mu$ g total protein/condition was alkylated in 20 mM iodoacetamide (IAA) for 20 min in the dark. A total of 2  $\mu$ L of endoproteinase Lys-C was added to the protein sample (6  $\mu$ g/ $\mu$ L; Wako Chemicals GmbH), and the solution incubated for 2 h at RT. The sample was then diluted 10 times with 20 mM TEAB, pH 7.5, and digested with trypsin overnight (1:50 w/w trypsin:protein). The enzymatic digestion was stopped with 5% formic acid (FA) and the peptide sample cleared by centrifugation (14,000 x g, 15 min). Protein and peptide quantification was performed by Qubit<sup>TM</sup> fluorometric quantitation (Invitrogen<sup>TM</sup>).

#### Tandem Mass Tag (TMT) labeling

A total of 100  $\mu$ g tryptic peptides were dried and desalted with R2/R3 columns, before TMT-10plex labeling (AB Sciex Pte. Ltd.). The desalting procedure is detailed below. Labeling was

performed according to manufacturer instructions: TMT-126 for WT-3 months(1), TMT-127N WT-3 months(2), TMT-127C Tg-3 months(1), TMT-128N Tg-3 months(2), TMT-128C for WT-24 months(1), TMT-129N for WT-24 months(2), TMT-129C for Tg-24 months(1), 130N for Tg-24 months(2), TMT-130C for human non-AD and TMT-131 for human AD. The labeled peptides from all groups were mixed 1:1, dried down and stored for further enrichment and analysis. Human AD and non-AD samples were included for validation, as well as for taking advantage of the stacking effect of the TMT10-plex, in order to increase identification rates.

#### Enrichment of phosphopeptides and formerly sialylated N-linked glycopeptides (deglycosylated)

Multi- and mono-phosphorylated peptides, as well as sialylated N-linked glycopeptides, were separated from unmodified peptides by using a TiO<sub>2</sub> workflow (67). Modified peptides bind to TiO<sub>2</sub> beads because the phospho and sialic groups are acidic and retained on the column, whereas unmodified peptides flow-through. The eluted modified peptides were deglycosylated to remove N-linked glycans (68). Hydrophilic interaction chromatography (HILIC) was used for sample fractionation prior to nano liquid chromatography-tandem mass spectrometry [LC-MS/MS; (67)].

Briefly, the combined labelled peptides (~1000 µg) were dissolved in TiO<sub>2</sub> loading buffer [80% acetonitrile (ACN), 5% trifluoroacetic acid (TFA), 1 M glycolic acid] and incubated for 30 min at RT with 6 mg of TiO<sub>2</sub> beads (5020 Titansphere™ TiO<sub>2</sub>, 5 µm; gift from GL Sciences). The beads were sequentially washed with TiO<sub>2</sub> loading buffer, 80% ACN/1% TFA and 10% ACN/0.1% TFA. Modified peptides were eluted with 1.5% ammonium hydroxide solution, pH 11.3, and dried-down in a vacuum centrifuge. The unbound TiO<sub>2</sub> fraction and the combined

washing fractions contain unmodified peptides. The dried modified peptides were deglycosylated at 37°C overnight in 20 mM TEAB buffer, pH 8.0, containing N-glycosidase F (P0705L, New England Biolabs Inc.) and Sialidase A<sup>TM</sup> (GK80046, ProZyme). Unmodified and modified peptides were dried and desalted on micro-columns before capillary HILIC fractionation.

#### Sample desalting with R2/R3 micro-column

Samples were desalted by using home-made P200 tip-based columns, packed with equal ratios of reversed-phase resin material Poros R2 (Oligo R2 Reversed Phase Resin 1-1112-46, Thermo Fisher Scientific) and Poros R3 (OligoR3 Reversed Phase Resin 1-1339-03, Thermo Fisher Scientific). The end of the tip was blocked with C8 material (Model 2314, 3m Empore<sup>TM</sup> C8). The column was prepared by short centrifugation (1000 x g) of the R3 reversed-phase resin (100% ACN), equilibrated with 0.1% TFA, and centrifuged again. The acidified samples were loaded onto the columns and washed three times with 0.1% TFA. Peptides were eluted with 50% ACN, 0.1% TFA and dried by vacuum centrifugation.

#### HILIC fractionation

The fractions containing unmodified peptides were fractionated prior to nanoLC-MS/MS analysis using HILIC, as described previously (69, 70). Peptides were dissolved in 90% ACN, 0.1% TFA (solvent B), and loaded onto a 450 µm OD x 320 µm ID x 17 cm micro-capillary column packed with TSK Amide-80 (3 µm; Tosoh Bioscience LLC). The peptides were separated on a 1200 Series HPLC (Agilent Technologies) over 30 min, by using a gradient from 100–60% solvent B (A = 0.1% TFA), at a flow-rate of 6 µL/min. Fractions were collected every

1 min based on the UV chromatogram. Subsequently, the peptide fractions were dried by vacuum centrifugation.

### Reversed-phase nanoLC-ESI-MS/MS

The peptides were resuspended in 0.1% FA, and automatically injected on a ReproSil-Pur C18 AQ, in-house packed-trap column (Dr. Maisch GmbH; 2 cm x 100  $\mu$ m inner diameter; 5  $\mu$ m). The peptides were separated by reversed phase chromatography at 250 nL/min on an analytical ReproSil-Pur C18 AQ column (Dr. Maisch GmbH), packed in-house (17 cm x 75  $\mu$ m; 3  $\mu$ m), which was operated on an EASY-nanoLC system (Thermo Fisher Scientific). Mobile phase was 95% ACN/ 0.1% FA (B) and water/0.1% FA (A). The gradient was from 1% to 30% B over 80 min for mono-phosphorylated, deglycosylated and unmodified peptides, and 1% to 30% solvent B over 110 min for multi-phosphorylated peptides, followed by 30 - 50% B over 10 min, 50 - 100% B over 5 min, and 8 min at 100% B. The nano-LC was connected online to a Q Exactive HF Hybrid Quadrupole-Orbitrap mass spectrometer (Thermo Fisher Scientific), operating in positive ion mode and using data-dependent acquisition. The eluent was directed toward the ion transfer tube of the Orbitrap instrument by dynamic electrospray ionization. The Orbitrap acquired the full MS scan with an automatic gain control target value of  $3 \times 10^6$  ions and a maximum fill time of 100 ms. Each MS scan was acquired in the Orbitrap at high-resolution [120,000 full-width half maximum (FWHM)] at m/z 200 with a mass range of 400-1400 Da. The 12 most abundant peptide ions were selected from the MS for higher energy collision-induced dissociation fragmentation (collision energy: 34 V) if they were at least doubly-charged. Fragmentation was performed at high resolution (60,000 FWHM) for a target of  $1 \times 10^5$  and a

maximum injection time of 60 ms using an isolation window of 1.2 m/z and a dynamic exclusion of 20 s.

### Data search & analysis

Raw data were searched against the mus musculus or homo sapiens reference databases from swissprot and uniprot via Mascot (v2.3.02, Matrix Science) and Sequest HT search engines, respectively, using Proteome Discoverer (v2.1, Thermo Fisher Scientific). A precursor mass tolerance of 20 ppm and a product ion mass tolerance of 0.05 Da was applied, allowing two missed cleavages for trypsin. Fixed modifications included carbamidomethylation of Cys/Arg and TMT-10plex labeling for Lys and N-termini. Variable modifications contained phosphorylation on Ser/Thr/Tyr, acetylation on the N-termini, oxidation of Met and deamidation of Asn. The TMT datasets were quantified using the centroid peak intensity with the 'reporter ions quantifier' node. To ensure high-confident identification, the Mascot percolator algorithm (q value filter set to 0.01), Mascot and Sequest HT peptide rank 1, a cut-off Mascot score value of  $\geq 18$ , and a Sequest HT $\Delta$ Cn of 0.1 were used. Only high confident peptides were used for further analysis. The peptides were filtered against a Decoy database resulting into a false discovery rate (FDR) of  $< 0.01$ . Two murine biological replicates per group without missing values were considered for the analysis, and normalization was performed on the protein median. Based on the mean technical variation from repetitive measurements of murine brain samples (61, 62), the threshold for determining regulated proteins was set to 1.3-fold, i.e. proteins with TMT ratios  $> 1.30$  were considered upregulated and  $< 0.77$  downregulated. Tau isoform-specific searches were performed by creating a Uniprot database of isoform sequences for mouse Tau (Uniprot ID: P10637-1, -2, -3, -4, -5, -6) and human Tau (Uniprot ID: P10636-1, -2, -3, -4, -5, -6, -7, -8, -9),

as performed by Morris et al. (71). Moderate confidence peptides (FDR<0.05) were included in the isoform-specific search.

### *RT-qPCR*

For reverse transcription, quantitative polymerase chain reaction (RT-qPCR), Trizol<sup>TM</sup>-isolated RNA (2 µg) from brain sections of WT and TG mice was reverse-transcribed to cDNA, by using the Applied Biosystems<sup>TM</sup> high-capacity cDNA transcription kit (Thermo Fisher Scientific). Samples were analyzed in triplicate on a StepOnePlus<sup>TM</sup> Real-Time PCR system (Applied Biosystems<sup>TM</sup>, Thermo Fisher Scientific). Each 20 µL sample contained nuclease-free H<sub>2</sub>O (Thermo Fisher Scientific), 1x Maxima SYBR<sup>®</sup> green/probe master mix (Thermo Fisher Scientific), 500 nM forward and reverse primers (TAG Copenhagen A/S), 4x diluted cDNA for *Mapt* and 10x diluted cDNA for hypoxanthine phosphoribosyltransferase (*Hprt1*), which was used as a reference gene. *Hprt1* sequences (72) and mouse-specific *Mapt* primers spanning exon 10 have been described previously (73). Conventional PCR cycling conditions were used [95°C (10 min), followed by 40 cycles of 95°C (15s)/60°C (1 min)], followed by a melt curve. After normalization to *Hprt1*, data were expressed as fold change from the mean value of the 3-month-old WT samples. Nuclease-free H<sub>2</sub>O and genomic DNA were used as controls.

### *Immunoblotting of sarkosyl-insoluble Tau*

Ten µg of lysed, denatured protein were separated on 4-12% Bolt Bis-Tris gradient gels (NW04125Box, Novex<sup>®</sup>), and transferred to polyvinylidene fluoride (PVDF) membranes using the Trans-Blot SD Semi-Dry Transfer Cell system (Bio-Rad Laboratories Inc.). Protein content on the PVDF membranes was visualized with PonceauS. Following washing (10 min) and blocking for 1 h in Roti<sup>®</sup>-Block (Carl Roth GmbH), the membranes were incubated overnight at

4°C in blocking solution, containing rabbit anti-tau (1:1000; A0024, Dako Agilent) or rabbit anti-phosphoSer404 primary antibodies (1:200; OAAF07796, Aviva Systems Biology). The blots were washed in TBS+1% Triton X-100 (3 x 15 min; TBS-Tx) and incubated for 2 h with horseradish peroxidase-conjugated secondary antibody (anti-rabbit IgG, HRP-linked antibody, #7074; Cell Signaling Technology®). After a final wash in TBS-Tx (3 x 15 min), the blots were developed with enhanced *chemiluminescent* substrate (ECL), according to manufacturer instructions (Luminata™ Forte Western HRP Substrate, WBLUF0100, Merck Millipore).

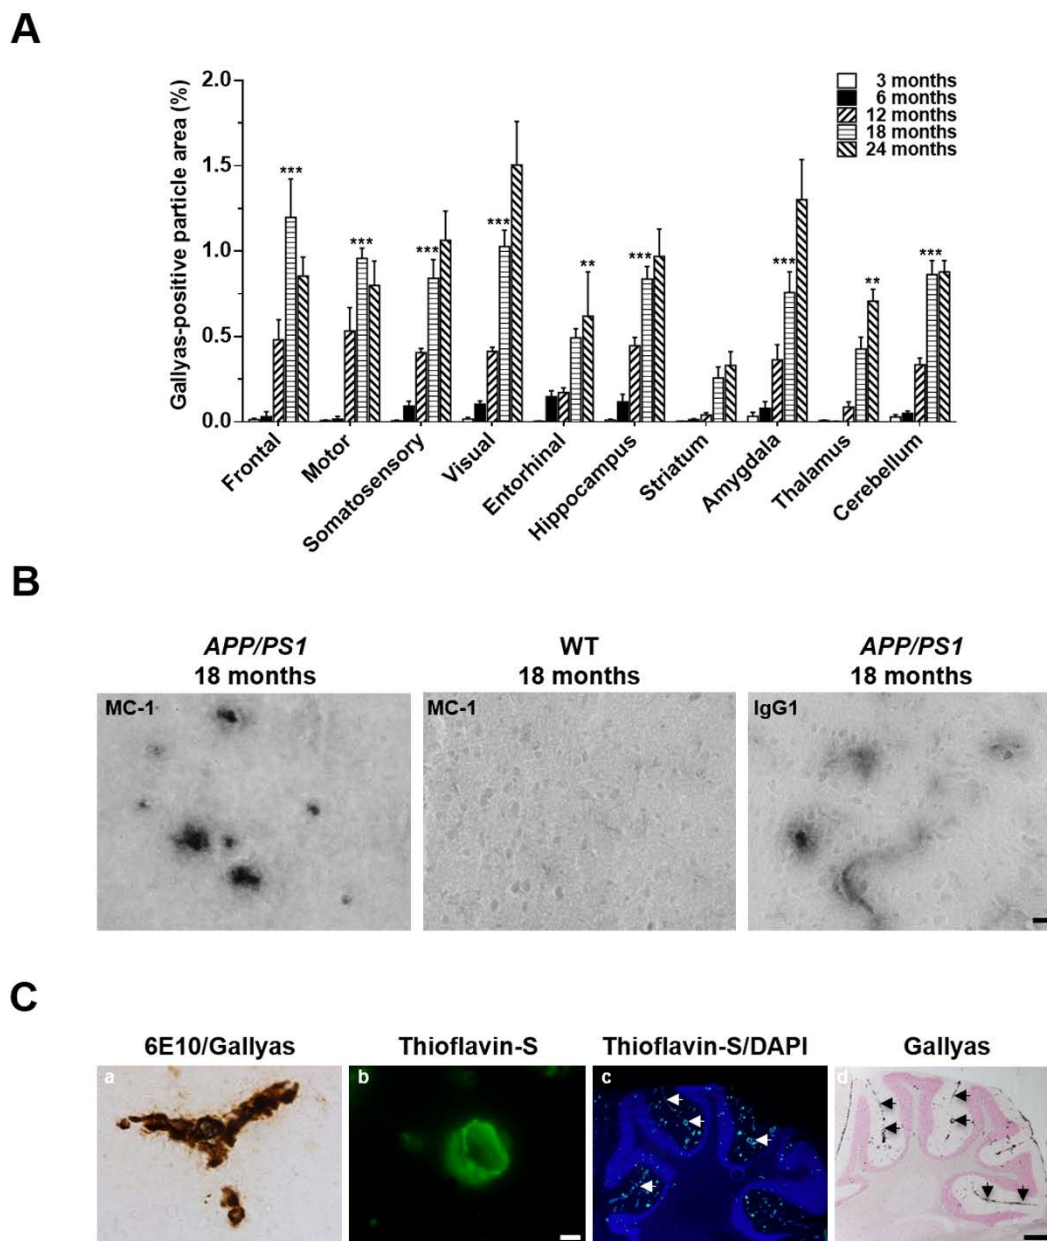

**Fig. S1. (A)** Quantification of Gallyas-positive signal in aging  $APP_{sw}/PS1_{\Delta E9}$  mice. Regions of interest were manually drawn by reference to the mouse brain atlas of Paxinos and Franklin (74). Gallyas-positive particles were measured with the particle analysis plugin in ImageJ, after thresholding ROIs on a black and white image display mode, by using default software settings. Data are presented as the mean area fraction occupied by Gallyas-positive particles  $\pm$  standard error of the mean (SEM), in brain regions of 5-6 animals/group. Asterisks denote the age when



Gallyas signal was first increased compared to 3-month old  $APP_{swe}/PSI_{\Delta E9}$  mice (\*\* $P < 0.01$ , \*\*\* $P < 0.001$ , Bonferroni *post-hoc* tests). Increased silver deposition across all brain areas analyzed was detected in 12- vs. 3- and 6-month-old  $APP_{swe}/PSI_{\Delta E9}$  mice ( $P < 0.001$ ), with additional accumulation occurring in 18- vs. 12- ( $P < 0.001$ ), and 24- vs. 18-month-old TG animals ( $P < 0.05$ , Bonferroni *post hoc* tests). Two-way ANOVA confirmed significant main effects of age [ $F_{(4,245)}=169.9$ ,  $P < 0.001$ ] and brain region [ $F_{(9,245)}=11.4$ ,  $P < 0.001$ ], as well as significant age x region interaction effects on the fraction of brain tissue bearing Gallyas-positive signal [ $F_{(36,245)}=3.2$ ,  $P < 0.001$ ]. **(B)** MC-1 immunoreactivity in the neocortex of 24-month-old TG and WT mice. Indications of conformationally modified tau were obtained by using the conformation-dependent MC-1 antibody. In mice, part of the MC-1 signal may be derived from non-specific binding to mouse immunoglobulin 1 (IgG1). Scale bar: 20  $\mu\text{m}$ . **(C)** Vascular and meningeal lesions in 18-month-old  $APP_{swe}/PSI_{\Delta E9}$  mice. Gallyas/6E10- (a) and thioflavin-S-positive vascular pathology (b). The arrows in (c) & (d) respectively point to thioflavin-S and Gallyas signal in the meninges of the cerebellum. Scale bars: 10  $\mu\text{m}$  (a & b), 200  $\mu\text{m}$  (c & d).

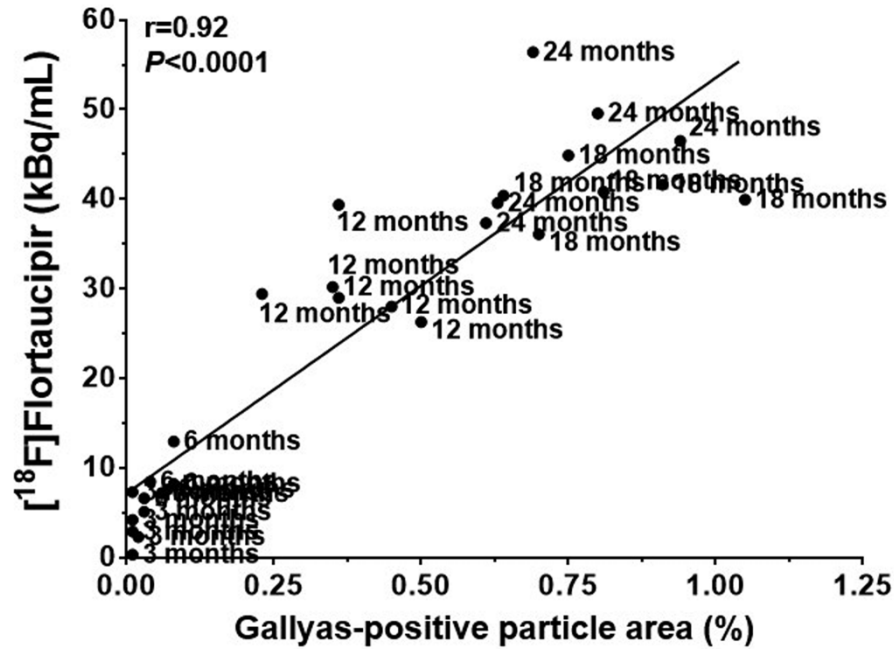

**Fig. S2.** Correlation between Gallyas-positive area fraction and [<sup>18</sup>F]Flortaucipir binding levels. Signals from the Gallyas silver stain and [<sup>18</sup>F]Flortaucipir autoradiography monitor the propagation of identical pathology, most likely tau-associated lesions. Each dot represents values from a single TG animal.

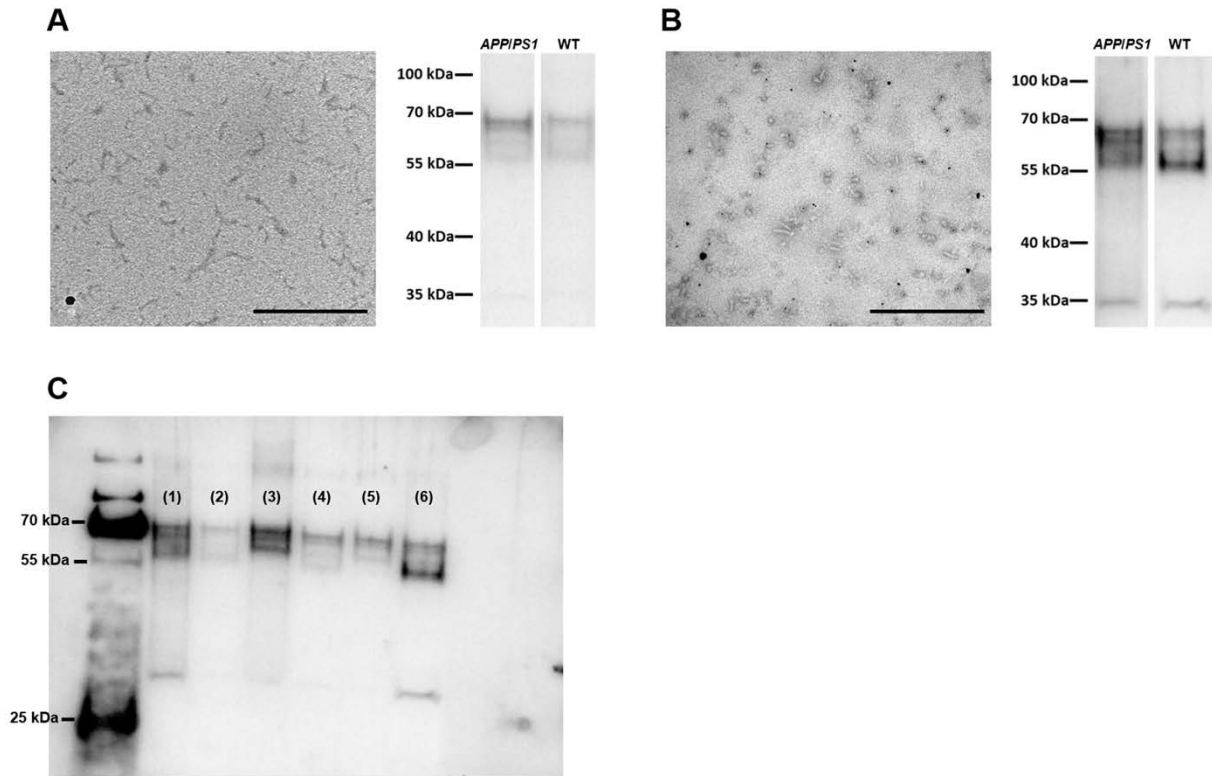

**Fig. S3.** Evaluation of methods for extracting sarkosyl-insoluble tau. TEM and immunoblotting of sarkosyl-insoluble tau, extracted according to **(A)** Sahara et al. (20) and **(B)** Greenberg and Davies (21). A triplet of immunoreactive bands in the 55-70 kDa range was detected by both methods, by using a rabbit antibody directed to the C-terminal domain of unmodified tau (aa 243-441; A0024, Dako Agilent). **(C)** Bands in A & B were spliced from gel in C, showing total tau immunoreactivity in the following groups: (1) TG 24 months, (6) WT 24 months (Greenberg and Davies method). (2) WT 24 months, (3) Human AD, (4) TG 18 months, (5) TG 24 months (Sarhara et al. method).

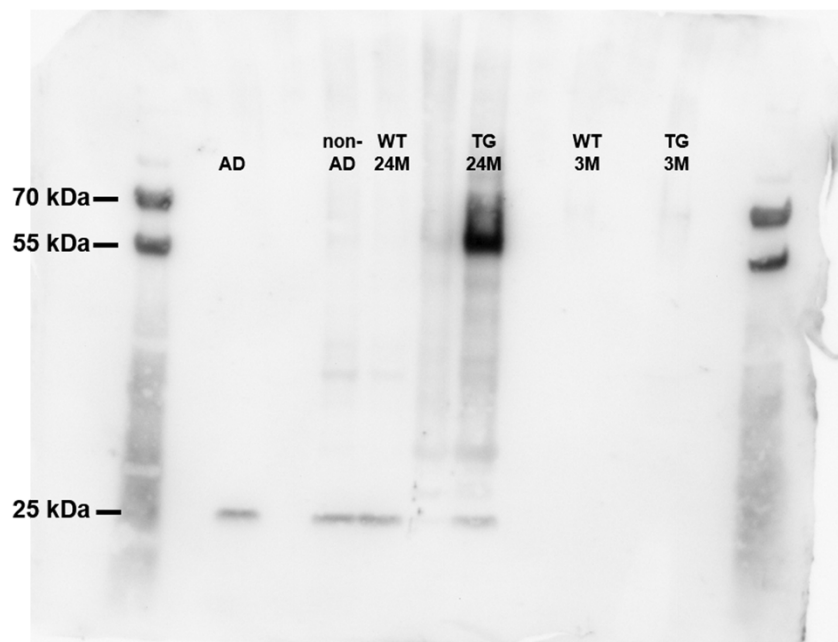

**Fig. S4.** pS404 immunoblot. The accumulation of sarkosyl-insoluble tau hyperphosphorylated at pS404 in 24-month-old transgenic (TG) mice was confirmed with a rabbit anti-phosphoSer404 antibody (1:200; OAAF07796, Aviva Systems Biology).

| Background strain | Age (Months) | Gender        | Method of Euthanasia | Method of Tau Evaluation | Antibody/Epitope                        | Brain Region                    | Reference |
|-------------------|--------------|---------------|----------------------|--------------------------|-----------------------------------------|---------------------------------|-----------|
| B6.C3             | 12           | Female        | Anesthesia           | IHC                      | pS262                                   | NCx                             | (75)      |
| B6.C3             | ~9           | Male          | Not reported         | IF & WB                  | pS396                                   | NCx & Hip                       | (76)      |
| B6.C3             | ~7.5         | Not reported  | Anesthesia           | IF                       | AT8 (pS202/pT205)                       | NCx & Hip                       | (77)      |
| B6.C3             | 6 to >24     | Male & Female | Anesthesia           | IHC                      | PHF1, CP13, pT231, p262, pS396, pS422   | Entire Brain                    | (78)      |
| B6.C3             | 8            | Not reported  | Anesthesia           | IHC                      | AT8 (pS202/pT205)                       | NCx & Hip                       | (79)      |
| B6.C3             | 10           | Male          | Not reported         | WB & Gallyas             | AT8 (pS202/pT205)                       | Entire Brain                    | (80)      |
| B6.C3             | 11 & 18      | Not reported  | Anesthesia           | IHC                      | AB1518 (not reported)                   | Hip                             | (81)      |
| B6.C3             | 11           | Not reported  | Anesthesia           | IHC                      | PHF1 (pS396/pS404)                      | NCx & Hip                       | (82)      |
| B6.C3             | ~7.5         | Not reported  | Anesthesia (?)       | WB & IHC                 | AT8 (pS202/pT205)<br>PHF1 (pS369/pS404) | NCx & Hip                       | (83)      |
| B6.C3             | ~7           | Male          | Anesthesia           | WB                       | pS519, pS202, pS235, pS396, pS404       | FrCx & Hip                      | (84)      |
| C57BL/6           | 6            | Female        | Cervical dislocation | WB                       | pT205, pS396, pS404                     | Hip                             | (85)      |
| C57BL/6J          | 22           | Female        | Anesthesia           | WB & IHC                 | pS199, pS396                            | NCx & Entire Brain              | (86)      |
| C57BL/6J          | 7            | Male          | Not reported         | IF                       | pS199                                   | NCx & Hip                       | (87)      |
| C57BL/6J          | 3-12         | Not reported  | Not reported         | WB                       | PHF1 (pS396/pS404)                      | FrCx                            | (88)      |
| C57BL/6J          | 12           | Male          | Cervical dislocation | Proteomics & Gallyas     | N/A                                     | NCx & Hip, Olf. Bulb, Brainstem | (61)      |
| C57BL/6           | ~9           | Female        | Anesthesia           | WB                       | pS235, pT205                            | Entire Brain                    | (89)      |
| C57BL/6J          | ~7.5         | Male          | Not reported         | WB                       | pS262                                   | NCx & Hip                       | (90)      |
| C57BL/6           | 7            | Male          | Decapitation         | WB                       | PHF1 (pS396/pS404)                      | Hip                             | (91)      |
| C57BL/6           | ~12          | Female        | Anesthesia           | WB                       | pS235, pT205                            | NCx & Hip                       | (92)      |
| C57BL/6           | 3 & 6        | Male          | Not reported         | WB                       | pS199, pT205, pS396, pS404              | Hip                             | (93)      |
| C57BL/6J          | ~7.5         | Male          | Not reported         | IF                       | pT181                                   | NCx & Hip                       | (94)      |
| C57BL/6J          | 6 & 9        | Male          | Anesthesia           | IF                       | pS199, pS202, pS262, pT181              | NCx                             | (95)      |
| C57BL/6           | 6-7          | Not reported  | Anesthesia           | IHC                      | AT8 (pS202/pT205)                       | Amygdala                        | (96)      |
| C57BL/6J          | 12           | Not reported  | Anesthesia           | IHC/IF                   | AT8 (pS202/pT205)<br>PHF1 (pS369/pS404) | NCx                             | (5)       |
| Not reported      | ~12          | Male          | Anesthesia           | WB                       | pS235, pT205                            | Entire Brain                    | (97)      |
| Not reported      | 3-12         | Not reported  | Anesthesia           | WB                       | pS199, pT205, pS396, pS404              | Entire Brain                    | (98)      |
| Not reported      | 6            | Not reported  | Anesthesia           | WB                       | AT8 (pS202/pT205)                       | NCx                             | (99)      |
| Not reported      | 7            | Not reported  | Anesthesia           | WB                       | pS396                                   | Brain hemisphere                | (100)     |
| Not reported      | ~7           | Not reported  | Anesthesia           | WB                       | AT8 (pS202/pT205)                       | NCx                             | (101)     |
| Not reported      | >18          | Not reported  | Anesthesia           | IHC                      | pS199, pT231                            | Cerebellum                      | (102)     |
| Not reported      | ~2-3         | Male          | Anesthesia           | WB                       | PHF1 (pS396/pS404)                      | NCx & Hip                       | (103)     |
| Not reported      | 2            | Male          | Anesthesia           | WB                       | AT8 (pS202/pT205)<br>PHF1 (pS396/pS404) | Subventricular zone, NCx & Hip  | (104)     |

**Table S1.** Evidence of tau hyperphosphorylation in *APP<sub>swE</sub>/PS1<sub>ΔE9</sub>* mice. Abbreviations: IHC:

Immunohistochemistry; WB: Western Blot; IF: Immunofluorescence; NCx: Neocortex; Fr Cx:

Frotnal Cortex; Hip: Hippocampus.

**DATA FILE S1**  
**REGULATED PROTEINS 3 MONTHS: TG vs. WT**

| Accession | Description                                                                                       | Abundance Ratio: (TG3) / (WT3) |
|-----------|---------------------------------------------------------------------------------------------------|--------------------------------|
| Q3V117    | ATP-citrate synthase OS=Mus musculus GN=Acly PE=1 SV=1                                            | 5,526                          |
| Q3TTY5    | Keratin, type II cytoskeletal 2 epidermal OS=Mus musculus GN=Krt2 PE=1 SV=1                       | 2,979                          |
| Q8BL66    | Early endosome antigen 1 OS=Mus musculus GN=Eea1 PE=1 SV=2                                        | 2,834                          |
| B1AQ77    | Keratin 15, isoform CRA_a OS=Mus musculus GN=Krt15 PE=1 SV=1                                      | 2,777                          |
| Q32P04    | Keratin 5 OS=Mus musculus GN=Krt5 PE=2 SV=2                                                       | 2,716                          |
| Q4VWZ5    | Acyl-CoA-binding protein OS=Mus musculus GN=Dbi PE=1 SV=1                                         | 2,416                          |
| Q61782    | Type I epidermal keratin mRNA, 3'end (Fragment) OS=Mus musculus PE=2 SV=1                         | 2,363                          |
| Q91VB8    | Alpha globin 1 OS=Mus musculus GN=haemaglobin alpha 2 PE=1 SV=1                                   | 2,309                          |
| Q3UBP6    | Putative uncharacterized protein OS=Mus musculus GN=Actb PE=2 SV=1                                | 2,147                          |
| D3YXH0    | Immunoglobulin superfamily member 5 OS=Mus musculus GN=Igsf5 PE=4 SV=1                            | 2,139                          |
| O08539    | Myc box-dependent-interacting protein 1 OS=Mus musculus GN=Bin1 PE=1 SV=1                         | 2,109                          |
| Q3UV17    | Keratin, type II cytoskeletal 2 oral OS=Mus musculus GN=Krt76 PE=2 SV=1                           | 2,096                          |
| P63005    | Platelet-activating factor acetylhydrolase IB subunit alpha OS=Mus musculus GN=Pafah1b1 PE=1 SV=2 | 2,078                          |
| Q548F2    | Guanine deaminase OS=Mus musculus GN=Gda PE=2 SV=1                                                | 1,997                          |
| G5E902    | MCG10343, isoform CRA_b OS=Mus musculus GN=Slc25a3 PE=1 SV=1                                      | 1,993                          |
| Q9DCW4    | Electron transfer flavoprotein subunit beta OS=Mus musculus GN=Etfb PE=1 SV=3                     | 1,984                          |
| Q149Z9    | Histone cluster 1, H1d OS=Mus musculus GN=Hist1h1d PE=2 SV=1                                      | 1,883                          |
| Q6ZWX2    | Thymosin, beta 4, X chromosome OS=Mus musculus GN=Tmsb4x PE=2 SV=1                                | 1,832                          |
| B1AWD9    | Clathrin light chain A OS=Mus musculus GN=Clta PE=1 SV=1                                          | 1,816                          |
| Q08331    | Calretinin OS=Mus musculus GN=Calb2 PE=1 SV=3                                                     | 1,814                          |
| P14115    | 60S ribosomal protein L27a OS=Mus musculus GN=Rpl27a PE=2 SV=5                                    | 1,809                          |
| P84086    | Complexin-2 OS=Mus musculus GN=Cplx2 PE=1 SV=1                                                    | 1,806                          |
| P02802    | Metallothionein-1 OS=Mus musculus GN=Mt1 PE=1 SV=1                                                | 1,796                          |
| Q8CI43    | Myosin light chain 6B OS=Mus musculus GN=Myl6b PE=2 SV=1                                          | 1,771                          |
| P47962    | 60S ribosomal protein L5 OS=Mus musculus GN=Rpl5 PE=1 SV=3                                        | 1,757                          |
| A8DUK4    | Beta-globin OS=Mus musculus GN=Hbbt1 PE=1 SV=1                                                    | 1,749                          |
| P99024    | Tubulin beta-5 chain OS=Mus musculus GN=Tubb5 PE=1 SV=1                                           | 1,713                          |
| Q546G4    | Albumin 1 OS=Mus musculus GN=Alb PE=2 SV=1                                                        | 1,688                          |
| P20065    | Thymosin beta-4 OS=Mus musculus GN=Tmsb4x PE=1 SV=1                                               | 1,682                          |
| P62717    | 60S ribosomal protein L18a OS=Mus musculus GN=Rpl18a PE=1 SV=1                                    | 1,68                           |
| P62204    | Calmodulin OS=Mus musculus GN=Calm1 PE=1 SV=2                                                     | 1,677                          |
| P19157    | Glutathione S-transferase P 1 OS=Mus musculus GN=Gstp1 PE=1 SV=2                                  | 1,651                          |
| Q9R0P9    | Ubiquitin carboxyl-terminal hydrolase isozyme L1 OS=Mus musculus GN=Uchl1 PE=1 SV=1               | 1,647                          |
| Q8VDD5    | Myosin-9 OS=Mus musculus GN=Myh9 PE=1 SV=4                                                        | 1,624                          |
| Q9EQU5-2  | Isoform 2 of Protein SET OS=Mus musculus GN=Set                                                   | 1,604                          |
| P17742    | Peptidyl-prolyl cis-trans isomerase A OS=Mus musculus GN=Ppia PE=1 SV=2                           | 1,595                          |
| Q810U4    | Neuronal cell adhesion molecule OS=Mus musculus GN=Nrcam PE=1 SV=2                                | 1,586                          |
| Q6IFX2    | Keratin, type I cytoskeletal 42 OS=Mus musculus GN=Krt42 PE=1 SV=1                                | 1,586                          |
| P14869    | 60S acidic ribosomal protein P0 OS=Mus musculus GN=Rplp0 PE=1 SV=3                                | 1,576                          |
| Q9WV69    | Dematin OS=Mus musculus GN=Dmtn PE=1 SV=1                                                         | 1,561                          |

|            |                                                                                                                             |       |
|------------|-----------------------------------------------------------------------------------------------------------------------------|-------|
| P17751     | Triosephosphate isomerase OS=Mus musculus GN=Tpi1 PE=1 SV=4                                                                 | 1,556 |
| P63101     | 14-3-3 protein zeta/delta OS=Mus musculus GN=Ywhaz PE=1 SV=1                                                                | 1,541 |
| Q5BLK1     | 40S ribosomal protein S6 OS=Mus musculus GN=Rps6 PE=2 SV=1                                                                  | 1,531 |
| P99027     | 60S acidic ribosomal protein P2 OS=Mus musculus GN=Rplp2 PE=1 SV=3                                                          | 1,519 |
| O55091     | Protein IMPACT OS=Mus musculus GN=Impact PE=1 SV=2                                                                          | 1,514 |
| P98086     | Complement C1q subcomponent subunit A OS=Mus musculus GN=C1qa PE=1 SV=2                                                     | 1,493 |
| E9Q557     | Desmoplakin OS=Mus musculus GN=Dsp PE=1 SV=1                                                                                | 1,474 |
| F8WGL3     | Cofilin-1 OS=Mus musculus GN=Cfl1 PE=1 SV=1                                                                                 | 1,429 |
| Q9CZC8     | Secernin-1 OS=Mus musculus GN=Scrn1 PE=1 SV=1                                                                               | 1,415 |
| Q9DBJ1     | Phosphoglycerate mutase 1 OS=Mus musculus GN=Pgam1 PE=1 SV=3                                                                | 1,411 |
| Q8C2Q7     | Heterogeneous nuclear ribonucleoprotein H OS=Mus musculus GN=Hnrnph1 PE=1 SV=1                                              | 1,401 |
| Q545V3     | Enolase 2, gamma neuronal, isoform CRA_a OS=Mus musculus GN=Eno2 PE=2 SV=1                                                  | 1,401 |
| Q505A8     | MCG17585 OS=Mus musculus GN=Rpl39 PE=2 SV=1                                                                                 | 1,399 |
| P68510     | 14-3-3 protein eta OS=Mus musculus GN=Ywhah PE=1 SV=2                                                                       | 1,394 |
| Q8K183     | Pyridoxal kinase OS=Mus musculus GN=Pdxk PE=1 SV=1                                                                          | 1,391 |
| Q3TT94     | Serine/threonine-protein phosphatase 2A 55 kDa regulatory subunit B OS=Mus musculus GN=Ppp2r2a PE=2 SV=1                    | 1,381 |
| D3Z4B2     | Gamma-soluble NSF attachment protein (Fragment) OS=Mus musculus GN=Napg PE=1 SV=1                                           | 1,369 |
| P99028     | Cytochrome b-c1 complex subunit 6, mitochondrial OS=Mus musculus GN=Uqcrh PE=1 SV=2                                         | 1,367 |
| Q3UR55     | ATPase, Na <sup>+</sup> /K <sup>+</sup> transporting, beta 2 polypeptide, isoform CRA_b OS=Mus musculus GN=Atp1b2 PE=2 SV=1 | 1,366 |
| Q63810     | Calcineurin subunit B type 1 OS=Mus musculus GN=Ppp3r1 PE=1 SV=3                                                            | 1,355 |
| G5E866     | Splicing factor 3B subunit 1 OS=Mus musculus GN=Sf3b1 PE=1 SV=1                                                             | 1,353 |
| P05132     | cAMP-dependent protein kinase catalytic subunit alpha OS=Mus musculus GN=Prkaca PE=1 SV=3                                   | 1,349 |
| P01831     | Thy-1 membrane glycoprotein OS=Mus musculus GN=Thy1 PE=1 SV=1                                                               | 1,323 |
| Q3UH59     | Myosin-10 OS=Mus musculus GN=Myh10 PE=1 SV=1                                                                                | 1,32  |
| P47963     | 60S ribosomal protein L13 OS=Mus musculus GN=Rpl13 PE=1 SV=3                                                                | 1,319 |
| Q80YN3     | Breast carcinoma-amplified sequence 1 homolog OS=Mus musculus GN=Bcas1 PE=1 SV=3                                            | 1,312 |
| Q5XJF6     | Ribosomal protein OS=Mus musculus GN=Rpl10a PE=1 SV=1                                                                       | 1,302 |
| Q8VDN2     | Sodium/potassium-transporting ATPase subunit alpha-1 OS=Mus musculus GN=Atp1a1 PE=1 SV=1                                    | 0,775 |
| Q99KI0     | Aconitate hydratase, mitochondrial OS=Mus musculus GN=Aco2 PE=1 SV=1                                                        | 0,773 |
| Q52KC1     | Eukaryotic translation initiation factor 4A2 OS=Mus musculus GN=Eif4a2 PE=2 SV=1                                            | 0,772 |
| Q91XV3     | Brain acid soluble protein 1 OS=Mus musculus GN=Basp1 PE=1 SV=3                                                             | 0,771 |
| Q548L4     | Glutamate decarboxylase OS=Mus musculus GN=Gad2 PE=2 SV=1                                                                   | 0,771 |
| A0A075B5P2 | Protein Igkc (Fragment) OS=Mus musculus GN=Igkc PE=1 SV=1                                                                   | 0,769 |
| Q80YX1     | Tenascin OS=Mus musculus GN=Tnc PE=1 SV=1                                                                                   | 0,768 |
| V9GX76     | Unconventional myosin-VI OS=Mus musculus GN=Myo6 PE=1 SV=1                                                                  | 0,768 |
| P63163     | Small nuclear ribonucleoprotein-associated protein N OS=Mus musculus GN=Snrpn PE=2 SV=1                                     | 0,766 |
| S4R1P5     | Dystonin OS=Mus musculus GN=Dst PE=1 SV=1                                                                                   | 0,765 |
| P60766     | Cell division control protein 42 homolog OS=Mus musculus GN=Cdc42 PE=1 SV=2                                                 | 0,765 |
| Q9CZ13     | Cytochrome b-c1 complex subunit 1, mitochondrial OS=Mus musculus GN=Uqcr1 PE=1 SV=2                                         | 0,764 |
| P61264     | Syntaxin-1B OS=Mus musculus GN=Stx1b PE=1 SV=1                                                                              | 0,764 |
| P40336     | Vacuolar protein sorting-associated protein 26A OS=Mus musculus GN=Vps26a PE=1 SV=1                                         | 0,76  |
| B2RTL5     | Aldehyde dehydrogenase family 1, subfamily A7 OS=Mus musculus GN=Aldh1a7 PE=2 SV=1                                          | 0,76  |
| E9Q455     | Tropomyosin alpha-1 chain OS=Mus musculus GN=Tpm1 PE=1 SV=1                                                                 | 0,759 |
| Q9Z2T6     | Keratin, type II cuticular Hb5 OS=Mus musculus GN=Krt85 PE=2 SV=2                                                           | 0,758 |

|        |                                                                                                                                             |       |
|--------|---------------------------------------------------------------------------------------------------------------------------------------------|-------|
| Q9CZU6 | Citrate synthase, mitochondrial OS=Mus musculus GN=Cs PE=1 SV=1                                                                             | 0,757 |
| P62858 | 40S ribosomal protein S28 OS=Mus musculus GN=Rps28 PE=1 SV=1                                                                                | 0,757 |
| P26883 | Peptidyl-prolyl cis-trans isomerase FKBP1A OS=Mus musculus GN=Fkbp1a PE=1 SV=2                                                              | 0,755 |
| P53395 | Lipoamide acyltransferase component of branched-chain alpha-keto acid dehydrogenase complex, mitochondrial OS=Mus musculus GN=Dbt PE=1 SV=2 | 0,755 |
| Q61838 | Alpha-2-macroglobulin OS=Mus musculus GN=A2m PE=1 SV=3                                                                                      | 0,754 |
| Q3TLP8 | RAS-related C3 botulinum substrate 1, isoform CRA_a OS=Mus musculus GN=Rac1 PE=1 SV=1                                                       | 0,753 |
| Q9JHU4 | Cytoplasmic dynein 1 heavy chain 1 OS=Mus musculus GN=Dync1h1 PE=1 SV=2                                                                     | 0,753 |
| S4R249 | Ankyrin-2 OS=Mus musculus GN=Ank2 PE=1 SV=1                                                                                                 | 0,753 |
| Q9EQF6 | Dihydropyrimidinase-related protein 5 OS=Mus musculus GN=Dpysl5 PE=1 SV=1                                                                   | 0,746 |
| F6TYB7 | Myelin basic protein (Fragment) OS=Mus musculus GN=Mbp PE=1 SV=1                                                                            | 0,745 |
| Q9WUM4 | Coronin-1C OS=Mus musculus GN=Coro1c PE=1 SV=2                                                                                              | 0,744 |
| Q9WUB3 | Glycogen phosphorylase, muscle form OS=Mus musculus GN=Pygm PE=1 SV=3                                                                       | 0,744 |
| Q8VCE0 | Sodium/potassium-transporting ATPase subunit alpha OS=Mus musculus GN=Atp1a3 PE=1 SV=1                                                      | 0,74  |
| P17427 | AP-2 complex subunit alpha-2 OS=Mus musculus GN=Ap2a2 PE=1 SV=2                                                                             | 0,739 |
| Q8CI94 | Glycogen phosphorylase, brain form OS=Mus musculus GN=Pygb PE=1 SV=3                                                                        | 0,737 |
| Q3U2G2 | Heat shock 70 kDa protein 4 OS=Mus musculus GN=Hspa4 PE=1 SV=1                                                                              | 0,736 |
| P35486 | Pyruvate dehydrogenase E1 component subunit alpha, somatic form, mitochondrial OS=Mus musculus GN=Pdha1 PE=1 SV=1                           | 0,735 |
| Q9JLM8 | Serine/threonine-protein kinase DCLK1 OS=Mus musculus GN=Dclk1 PE=1 SV=1                                                                    | 0,731 |
| Q5SXR6 | Clathrin heavy chain OS=Mus musculus GN=Cltc PE=1 SV=1                                                                                      | 0,73  |
| Q8C522 | Endonuclease domain-containing 1 protein OS=Mus musculus GN=Endod1 PE=1 SV=2                                                                | 0,729 |
| Q9JKC6 | Cell cycle exit and neuronal differentiation protein 1 OS=Mus musculus GN=Cend1 PE=1 SV=1                                                   | 0,725 |
| B2RTM0 | Histone H4 OS=Mus musculus GN=Hist2h4 PE=2 SV=1                                                                                             | 0,725 |
| P63276 | 40S ribosomal protein S17 OS=Mus musculus GN=Rps17 PE=1 SV=2                                                                                | 0,724 |
| Q62261 | Spectrin beta chain, non-erythrocytic 1 OS=Mus musculus GN=Sptbn1 PE=1 SV=2                                                                 | 0,724 |
| A2AUK5 | Band 4.1-like protein 1 OS=Mus musculus GN=Epb4111 PE=1 SV=1                                                                                | 0,722 |
| Q8BVI4 | Dihydropteridine reductase OS=Mus musculus GN=Qdpr PE=1 SV=2                                                                                | 0,72  |
| P47857 | ATP-dependent 6-phosphofructokinase, muscle type OS=Mus musculus GN=Pfkm PE=1 SV=3                                                          | 0,72  |
| P60202 | Myelin proteolipid protein OS=Mus musculus GN=Plp1 PE=1 SV=2                                                                                | 0,719 |
| E9Q7Q3 | Tropomyosin alpha-3 chain OS=Mus musculus GN=Tpm3 PE=1 SV=1                                                                                 | 0,718 |
| Q5SYD0 | Unconventional myosin-Id OS=Mus musculus GN=Myo1d PE=1 SV=1                                                                                 | 0,718 |
| Q9QWL7 | Keratin, type I cytoskeletal 17 OS=Mus musculus GN=Krt17 PE=1 SV=3                                                                          | 0,71  |
| P84078 | ADP-ribosylation factor 1 OS=Mus musculus GN=Arf1 PE=1 SV=2                                                                                 | 0,71  |
| P43274 | Histone H1.4 OS=Mus musculus GN=Hist1h1e PE=1 SV=2                                                                                          | 0,71  |
| Q9WV92 | Band 4.1-like protein 3 OS=Mus musculus GN=Epb4113 PE=1 SV=1                                                                                | 0,709 |
| G5E924 | Heterogeneous nuclear ribonucleoprotein L (Fragment) OS=Mus musculus GN=Hnrnpl PE=1 SV=1                                                    | 0,708 |
| P63318 | Protein kinase C gamma type OS=Mus musculus GN=Prkcg PE=1 SV=1                                                                              | 0,707 |
| Q9CZY3 | Ubiquitin-conjugating enzyme E2 variant 1 OS=Mus musculus GN=Ube2v1 PE=1 SV=1                                                               | 0,707 |
| P48771 | Cytochrome c oxidase subunit 7A2, mitochondrial OS=Mus musculus GN=Cox7a2 PE=1 SV=2                                                         | 0,706 |
| Q3TI05 | Chaperonin containing Tcp1, subunit 6a (Zeta) OS=Mus musculus GN=Cct6a PE=2 SV=1                                                            | 0,706 |
| B2RRX2 | Serine/threonine-protein phosphatase OS=Mus musculus GN=Ppp3ca PE=2 SV=1                                                                    | 0,704 |
| Q9D0M3 | Cytochrome c1, heme protein, mitochondrial OS=Mus musculus GN=Cyc1 PE=1 SV=1                                                                | 0,701 |
| P56399 | Ubiquitin carboxyl-terminal hydrolase 5 OS=Mus musculus GN=Usp5 PE=1 SV=1                                                                   | 0,701 |
| Q543Y7 | Putative uncharacterized protein OS=Mus musculus GN=Pascin1 PE=2 SV=1                                                                       | 0,7   |
| Q9DCD0 | 6-phosphogluconate dehydrogenase, decarboxylating OS=Mus musculus GN=Pgd PE=1 SV=3                                                          | 0,693 |



|            |                                                                                                            |       |
|------------|------------------------------------------------------------------------------------------------------------|-------|
| A0A0A0MQA5 | Tubulin alpha chain (Fragment) OS=Mus musculus GN=Tuba4a PE=1 SV=1                                         | 0,693 |
| P46097     | Synaptotagmin-2 OS=Mus musculus GN=Syt2 PE=1 SV=1                                                          | 0,689 |
| P39053     | Dynamin-1 OS=Mus musculus GN=Dnm1 PE=1 SV=2                                                                | 0,689 |
| Q9Z1G4     | V-type proton ATPase 116 kDa subunit a isoform 1 OS=Mus musculus GN=Atp6v0a1 PE=1 SV=3                     | 0,688 |
| Q9CX86     | Heterogeneous nuclear ribonucleoprotein A0 OS=Mus musculus GN=Hnrnpa0 PE=1 SV=1                            | 0,688 |
| P26645     | Myristoylated alanine-rich C-kinase substrate OS=Mus musculus GN=Marcks PE=1 SV=2                          | 0,682 |
| Q78ZJ8     | MCG22989, isoform CRA_b OS=Mus musculus GN=Rab11b PE=2 SV=1                                                | 0,681 |
| Q8R001     | Microtubule-associated protein RP/EB family member 2 OS=Mus musculus GN=Mapre2 PE=1 SV=1                   | 0,68  |
| P11798     | Calcium/calmodulin-dependent protein kinase type II subunit alpha OS=Mus musculus GN=Camk2a PE=1 SV=2      | 0,677 |
| Q3UNV7     | Putative uncharacterized protein OS=Mus musculus GN=Mlf2 PE=2 SV=1                                         | 0,675 |
| E9Q401     | Ryanodine receptor 2 OS=Mus musculus GN=Ryr2 PE=1 SV=1                                                     | 0,675 |
| Q9D051     | Pyruvate dehydrogenase E1 component subunit beta, mitochondrial OS=Mus musculus GN=Pdhb PE=1 SV=1          | 0,674 |
| Q3UMU9     | Hepatoma-derived growth factor-related protein 2 OS=Mus musculus GN=Hdgfrp2 PE=1 SV=1                      | 0,674 |
| Q9Z2I9     | Succinate--CoA ligase [ADP-forming] subunit beta, mitochondrial OS=Mus musculus GN=Sucla2 PE=1 SV=2        | 0,674 |
| P14148     | 60S ribosomal protein L7 OS=Mus musculus GN=Rpl7 PE=1 SV=2                                                 | 0,673 |
| P19001     | Keratin, type I cytoskeletal 19 OS=Mus musculus GN=Krt19 PE=1 SV=1                                         | 0,672 |
| Q922J6     | Tetraspanin-2 OS=Mus musculus GN=Tspan2 PE=1 SV=1                                                          | 0,672 |
| P62317     | Small nuclear ribonucleoprotein Sm D2 OS=Mus musculus GN=Snrpd2 PE=3 SV=1                                  | 0,67  |
| O70318     | Band 4.1-like protein 2 OS=Mus musculus GN=Epb41I2 PE=1 SV=2                                               | 0,667 |
| Q923T9     | Calcium/calmodulin-dependent protein kinase type II subunit gamma OS=Mus musculus GN=Camk2g PE=1 SV=1      | 0,666 |
| A0A0G2JFT8 | Protein RUFY3 OS=Mus musculus GN=Rufy3 PE=1 SV=1                                                           | 0,666 |
| Q3UHL1     | CaM kinase-like vesicle-associated protein OS=Mus musculus GN=Camkv PE=1 SV=2                              | 0,662 |
| P62305     | Small nuclear ribonucleoprotein E OS=Mus musculus GN=Snrpe PE=1 SV=1                                       | 0,661 |
| Q5DQJ3     | Capping protein (Actin filament) muscle Z-line, alpha 2, isoform CRA_c OS=Mus musculus GN=Capza2 PE=2 SV=1 | 0,659 |
| Q7TSJ2     | Microtubule-associated protein 6 OS=Mus musculus GN=Map6 PE=1 SV=2                                         | 0,657 |
| Q9Z1B3     | 1-phosphatidylinositol 4,5-bisphosphate phosphodiesterase beta-1 OS=Mus musculus GN=Plcb1 PE=1 SV=2        | 0,655 |
| Q3UYK6     | Amino acid transporter OS=Mus musculus GN=Slc1a2 PE=2 SV=1                                                 | 0,655 |
| B2RXY7     | Carbonyl reductase 1 OS=Mus musculus GN=Cbr1 PE=2 SV=1                                                     | 0,654 |
| P52480-2   | Isoform M1 of Pyruvate kinase PKM OS=Mus musculus GN=Pkm                                                   | 0,652 |
| Q3TXU4     | Apolipoprotein E, isoform CRA_h OS=Mus musculus GN=ApoE PE=2 SV=1                                          | 0,652 |
| P62715     | Serine/threonine-protein phosphatase 2A catalytic subunit beta isoform OS=Mus musculus GN=Ppp2cb PE=1 SV=1 | 0,652 |
| P80313     | T-complex protein 1 subunit eta OS=Mus musculus GN=Cct7 PE=1 SV=1                                          | 0,651 |
| P61255     | 60S ribosomal protein L26 OS=Mus musculus GN=Rpl26 PE=1 SV=1                                               | 0,648 |
| Q4FJX4     | Csrp1 protein OS=Mus musculus GN=Csrp1 PE=2 SV=1                                                           | 0,648 |
| Q8VEK3     | Heterogeneous nuclear ribonucleoprotein U OS=Mus musculus GN=Hnrnpu PE=1 SV=1                              | 0,647 |
| Q3UAD6     | Heat shock protein 90kDa beta (Grp94), member 1 OS=Mus musculus GN=Hsp90b1 PE=2 SV=1                       | 0,645 |
| Q9QUM9     | Proteasome subunit alpha type-6 OS=Mus musculus GN=PsmA6 PE=1 SV=1                                         | 0,643 |
| P47757     | F-actin-capping protein subunit beta OS=Mus musculus GN=Capzb PE=1 SV=3                                    | 0,642 |
| Q9R1P1     | Proteasome subunit beta type-3 OS=Mus musculus GN=PsmB3 PE=1 SV=1                                          | 0,642 |
| P12382     | ATP-dependent 6-phosphofructokinase, liver type OS=Mus musculus GN=Pfkf PE=1 SV=4                          | 0,639 |
| Q8BMS1     | Trifunctional enzyme subunit alpha, mitochondrial OS=Mus musculus GN=Hadha PE=1 SV=1                       | 0,638 |
| E9PYH0     | Versican core protein OS=Mus musculus GN=Vcan PE=1 SV=1                                                    | 0,632 |
| P27773     | Protein disulfide-isomerase A3 OS=Mus musculus GN=Pdia3 PE=1 SV=2                                          | 0,632 |
| Q8BG05     | Heterogeneous nuclear ribonucleoprotein A3 OS=Mus musculus GN=Hnrnpa3 PE=1 SV=1                            | 0,628 |

|          |                                                                                                    |       |
|----------|----------------------------------------------------------------------------------------------------|-------|
| P00920   | Carbonic anhydrase 2 OS=Mus musculus GN=Ca2 PE=1 SV=4                                              | 0,626 |
| E9QAX2   | Unconventional myosin-XVIIIa OS=Mus musculus GN=Myo18a PE=1 SV=1                                   | 0,625 |
| P19246   | Neurofilament heavy polypeptide OS=Mus musculus GN=Nefh PE=1 SV=3                                  | 0,623 |
| P17426   | AP-2 complex subunit alpha-1 OS=Mus musculus GN=Ap2a1 PE=1 SV=1                                    | 0,623 |
| Q68FL4   | Putative adenosylhomocysteinase 3 OS=Mus musculus GN=Ahcyl2 PE=1 SV=1                              | 0,619 |
| Q2PFD7   | PH and SEC7 domain-containing protein 3 OS=Mus musculus GN=Psd3 PE=1 SV=2                          | 0,615 |
| Q3UY21   | Myelin-oligodendrocyte glycoprotein OS=Mus musculus GN=Mog PE=1 SV=1                               | 0,614 |
| P10637-3 | Isoform Tau-B of Microtubule-associated protein tau OS=Mus musculus GN=Mapt                        | 0,611 |
| Q8BFZ9   | Erlin-2 OS=Mus musculus GN=Erlin2 PE=1 SV=1                                                        | 0,61  |
| E9PVP0   | PCTP-like protein OS=Mus musculus GN=Stard10 PE=1 SV=1                                             | 0,609 |
| Q8ROY6   | Cytosolic 10-formyltetrahydrofolate dehydrogenase OS=Mus musculus GN=Aldh1l1 PE=1 SV=1             | 0,608 |
| Q61282   | Aggrecan core protein OS=Mus musculus GN=Acan PE=1 SV=2                                            | 0,607 |
| O09061   | Proteasome subunit beta type-1 OS=Mus musculus GN=Psmb1 PE=1 SV=1                                  | 0,599 |
| Q542X7   | Chaperonin subunit 2 (Beta), isoform CRA_a OS=Mus musculus GN=Cct2 PE=2 SV=1                       | 0,597 |
| O55143   | Sarcoplasmic/endoplasmic reticulum calcium ATPase 2 OS=Mus musculus GN=Atp2a2 PE=1 SV=2            | 0,591 |
| Q5FWI9   | Adaptor protein complex AP-2, mu1 OS=Mus musculus GN=Ap2m1 PE=2 SV=1                               | 0,587 |
| Q7M6W1   | Reticulon OS=Mus musculus GN=Rtn1 PE=1 SV=1                                                        | 0,587 |
| P55066   | Neurocan core protein OS=Mus musculus GN=Ncan PE=2 SV=1                                            | 0,585 |
| Q8BYI9   | Tenascin-R OS=Mus musculus GN=Tnr PE=1 SV=2                                                        | 0,584 |
| Q9JLZ3   | Methylglutaconyl-CoA hydratase, mitochondrial OS=Mus musculus GN=Auh PE=1 SV=1                     | 0,58  |
| P62307   | Small nuclear ribonucleoprotein F OS=Mus musculus GN=Snrpf PE=1 SV=1                               | 0,58  |
| Q544E3   | Phosphatidylinositol-4-phosphate 5-kinase, type II, alpha OS=Mus musculus GN=Pip4k2a PE=2 SV=1     | 0,579 |
| P48036   | Annexin A5 OS=Mus musculus GN=Anxa5 PE=1 SV=1                                                      | 0,573 |
| P31324   | cAMP-dependent protein kinase type II-beta regulatory subunit OS=Mus musculus GN=Prkar2b PE=1 SV=3 | 0,572 |
| Q99M71   | Mammalian ependymin-related protein 1 OS=Mus musculus GN=Epdr1 PE=2 SV=1                           | 0,571 |
| P70202   | Latexin OS=Mus musculus GN=Lxn PE=1 SV=2                                                           | 0,57  |
| P12023   | Amyloid beta A4 protein OS=Mus musculus GN=App PE=1 SV=3                                           | 0,57  |
| Q9QUP5   | Hyaluronan and proteoglycan link protein 1 OS=Mus musculus GN=Hapln1 PE=1 SV=1                     | 0,568 |
| Q04690   | Neurofibromin OS=Mus musculus GN=Nf1 PE=1 SV=1                                                     | 0,566 |
| Q9CU62   | Structural maintenance of chromosomes protein 1A OS=Mus musculus GN=Smc1a PE=1 SV=4                | 0,566 |
| Q9QYC0   | Alpha-adducin OS=Mus musculus GN=Add1 PE=1 SV=2                                                    | 0,564 |
| Q9ESM3   | Hyaluronan and proteoglycan link protein 2 OS=Mus musculus GN=Hapln2 PE=1 SV=1                     | 0,563 |
| Q5BLK0   | MCG18564, isoform CRA_a OS=Mus musculus GN=Rpl12 PE=2 SV=1                                         | 0,56  |
| P31650   | Sodium- and chloride-dependent GABA transporter 3 OS=Mus musculus GN=Slc6a11 PE=1 SV=2             | 0,56  |
| Q9R1P0   | Proteasome subunit alpha type-4 OS=Mus musculus GN=Psm4 PE=1 SV=1                                  | 0,56  |
| Q9QXS1   | Plectin OS=Mus musculus GN=Plec PE=1 SV=3                                                          | 0,559 |
| Q9Z331   | Keratin, type II cytoskeletal 6B OS=Mus musculus GN=Krt6b PE=1 SV=3                                | 0,558 |
| P09528   | Ferritin heavy chain OS=Mus musculus GN=Fth1 PE=1 SV=2                                             | 0,558 |
| P11881   | Inositol 1,4,5-trisphosphate receptor type 1 OS=Mus musculus GN=Itpr1 PE=1 SV=2                    | 0,557 |
| F8WHB1   | Calcium-transporting ATPase OS=Mus musculus GN=Atp2b2 PE=1 SV=1                                    | 0,556 |
| P97300   | Neuroplastin OS=Mus musculus GN=Nptn PE=1 SV=3                                                     | 0,555 |
| Q5SS83   | Flotillin 2, isoform CRA_a OS=Mus musculus GN=Flot2 PE=1 SV=1                                      | 0,555 |
| Q91ZX7   | Pro-low-density lipoprotein receptor-related protein 1 OS=Mus musculus GN=Lrp1 PE=1 SV=1           | 0,554 |
| Q3TQ70   | Beta1 subunit of GTP-binding protein OS=Mus musculus GN=Gnb1 PE=2 SV=1                             | 0,549 |

|            |                                                                                                                                              |       |
|------------|----------------------------------------------------------------------------------------------------------------------------------------------|-------|
| Q60692     | Proteasome subunit beta type-6 OS=Mus musculus GN=Psmb6 PE=1 SV=3                                                                            | 0,547 |
| A6H611     | Mitochondrial intermediate peptidase OS=Mus musculus GN=Mipep PE=1 SV=1                                                                      | 0,544 |
| Q9CXS4     | Centromere protein V OS=Mus musculus GN=Cenpv PE=1 SV=2                                                                                      | 0,543 |
| Q9Z2U0     | Proteasome subunit alpha type-7 OS=Mus musculus GN=Psm7 PE=1 SV=1                                                                            | 0,541 |
| Q8C605     | ATP-dependent 6-phosphofructokinase OS=Mus musculus GN=Pfkp PE=1 SV=1                                                                        | 0,54  |
| P48722     | Heat shock 70 kDa protein 4L OS=Mus musculus GN=Hspa4l PE=1 SV=2                                                                             | 0,54  |
| P63011     | Ras-related protein Rab-3A OS=Mus musculus GN=Rab3a PE=1 SV=1                                                                                | 0,539 |
| A0A0G2JGS4 | Calcium/calmodulin-dependent protein kinase type II subunit delta OS=Mus musculus GN=Camk2d PE=4 SV=1                                        | 0,539 |
| P17156     | Heat shock-related 70 kDa protein 2 OS=Mus musculus GN=Hspa2 PE=1 SV=2                                                                       | 0,539 |
| P99026     | Proteasome subunit beta type-4 OS=Mus musculus GN=Psm4 PE=1 SV=1                                                                             | 0,538 |
| Q9R1P4     | Proteasome subunit alpha type-1 OS=Mus musculus GN=Psm1 PE=1 SV=1                                                                            | 0,53  |
| P01592     | Immunoglobulin J chain OS=Mus musculus GN=Igj PE=2 SV=4                                                                                      | 0,53  |
| P35235     | Tyrosine-protein phosphatase non-receptor type 11 OS=Mus musculus GN=Ptpn11 PE=1 SV=2                                                        | 0,527 |
| Q99PU5     | Long-chain-fatty-acid--CoA ligase ACSBG1 OS=Mus musculus GN=Acsbg1 PE=1 SV=1                                                                 | 0,523 |
| P60879     | Synaptosomal-associated protein 25 OS=Mus musculus GN=Snap25 PE=1 SV=1                                                                       | 0,522 |
| Q80TL4     | PHD finger protein 24 OS=Mus musculus GN=Phf24 PE=1 SV=2                                                                                     | 0,521 |
| Q545X8     | 40S ribosomal protein S4 OS=Mus musculus GN=Rps4x PE=2 SV=1                                                                                  | 0,52  |
| Q9QYX7     | Protein piccolo OS=Mus musculus GN=Pclo PE=1 SV=4                                                                                            | 0,518 |
| D0VYV6     | Erythrocyte protein band 4.1-like 3 isoform B OS=Mus musculus GN=Epb4.1i3 PE=2 SV=1                                                          | 0,518 |
| Q8BVE3     | V-type proton ATPase subunit H OS=Mus musculus GN=Atp6v1h PE=1 SV=1                                                                          | 0,517 |
| O08917     | Flotillin-1 OS=Mus musculus GN=Flot1 PE=1 SV=1                                                                                               | 0,513 |
| Q9WTL4     | Insulin receptor-related protein OS=Mus musculus GN=Insrr PE=1 SV=2                                                                          | 0,512 |
| P21460     | Cystatin-C OS=Mus musculus GN=Cst3 PE=1 SV=2                                                                                                 | 0,501 |
| P62814     | V-type proton ATPase subunit B, brain isoform OS=Mus musculus GN=Atp6v1b2 PE=1 SV=1                                                          | 0,5   |
| A0A076FRG6 | KCC2a variant 1 OS=Mus musculus GN=Slc12a5 PE=2 SV=1                                                                                         | 0,497 |
| O55234     | Proteasome subunit beta type-5 OS=Mus musculus GN=Psm5 PE=1 SV=3                                                                             | 0,487 |
| P49722     | Proteasome subunit alpha type-2 OS=Mus musculus GN=Psm2 PE=1 SV=3                                                                            | 0,484 |
| Q9D2G2     | Dihydropyridylsuccinylsuccinyltransferase component of 2-oxoglutarate dehydrogenase complex, mitochondrial OS=Mus musculus GN=Dlst PE=1 SV=1 | 0,481 |
| Q9CPX4     | Ferritin OS=Mus musculus GN=Ftl1 PE=1 SV=1                                                                                                   | 0,477 |
| Q8BGT8     | Phytanoyl-CoA hydroxylase-interacting protein-like OS=Mus musculus GN=Phyhipl PE=2 SV=1                                                      | 0,476 |
| P70441     | Na(+)/H(+) exchange regulatory cofactor NHE-RF1 OS=Mus musculus GN=Slc9a3r1 PE=1 SV=3                                                        | 0,475 |
| Q0VF55     | Calcium-transporting ATPase OS=Mus musculus GN=Atp2b3 PE=1 SV=1                                                                              | 0,472 |
| P63085     | Mitogen-activated protein kinase 1 OS=Mus musculus GN=Mapk1 PE=1 SV=3                                                                        | 0,47  |
| Q3UGC8     | Propionyl-Coenzyme A carboxylase, alpha polypeptide, isoform CRA_b OS=Mus musculus GN=Pcca PE=2 SV=1                                         | 0,468 |
| Q9Z2U1     | Proteasome subunit alpha type-5 OS=Mus musculus GN=Psm5 PE=1 SV=1                                                                            | 0,463 |
| P62827     | GTP-binding nuclear protein Ran OS=Mus musculus GN=Ran PE=1 SV=3                                                                             | 0,462 |
| Q9JIS5     | Synaptic vesicle glycoprotein 2A OS=Mus musculus GN=Sv2a PE=1 SV=1                                                                           | 0,46  |
| Q9R1P3     | Proteasome subunit beta type-2 OS=Mus musculus GN=Psm2 PE=1 SV=1                                                                             | 0,459 |
| Q9QZQ8     | Core histone macro-H2A.1 OS=Mus musculus GN=H2afy PE=1 SV=3                                                                                  | 0,454 |
| Q91VE0     | Long-chain fatty acid transport protein 4 OS=Mus musculus GN=Slc27a4 PE=1 SV=1                                                               | 0,454 |
| O35955     | Proteasome subunit beta type-10 OS=Mus musculus GN=Psm10 PE=1 SV=1                                                                           | 0,45  |
| O54962     | Barrier-to-autointegration factor OS=Mus musculus GN=Banf1 PE=1 SV=1                                                                         | 0,448 |
| A2AWN8     | YTH domain family 1, isoform CRA_a OS=Mus musculus GN=Ythdf1 PE=1 SV=1                                                                       | 0,448 |
| P70195     | Proteasome subunit beta type-7 OS=Mus musculus GN=Psm7 PE=1 SV=1                                                                             | 0,447 |

|        |                                                                                                                                            |       |
|--------|--------------------------------------------------------------------------------------------------------------------------------------------|-------|
| P14106 | Complement C1q subcomponent subunit B OS=Mus musculus GN=C1qb PE=1 SV=2                                                                    | 0,441 |
| Q8BKZ9 | Pyruvate dehydrogenase protein X component, mitochondrial OS=Mus musculus GN=Pdhx PE=1 SV=1                                                | 0,438 |
| Q91ZU6 | Dystonin OS=Mus musculus GN=Dst PE=1 SV=2                                                                                                  | 0,438 |
| Q8R016 | Bleomycin hydrolase OS=Mus musculus GN=Blmh PE=1 SV=1                                                                                      | 0,437 |
| Q3U7E0 | Putative uncharacterized protein OS=Mus musculus GN=Atp6v1g1 PE=2 SV=1                                                                     | 0,436 |
| A2CEK3 | Phosphoglucomutase-2 OS=Mus musculus GN=Pgm2 PE=1 SV=1                                                                                     | 0,431 |
| B9EIC7 | MCG3853 OS=Mus musculus GN=Phyhip PE=2 SV=1                                                                                                | 0,43  |
| E9PUA3 | IQ motif and SEC7 domain-containing protein 1 OS=Mus musculus GN=Iqsec1 PE=1 SV=1                                                          | 0,421 |
| Q8BMF4 | Dihydrolipoyllysine-residue acetyltransferase component of pyruvate dehydrogenase complex, mitochondrial OS=Mus musculus GN=Dlat PE=1 SV=2 | 0,407 |
| P42669 | Transcriptional activator protein Pur-alpha OS=Mus musculus GN=Pura PE=1 SV=1                                                              | 0,398 |
| Q9Z0H4 | CUGBP Elav-like family member 2 OS=Mus musculus GN=Celf2 PE=1 SV=1                                                                         | 0,395 |
| Q58EV4 | Proteasome subunit alpha type OS=Mus musculus GN=Pma3 PE=2 SV=1                                                                            | 0,393 |
| Q9Z0E0 | Neurochondrin OS=Mus musculus GN=Ncdn PE=1 SV=1                                                                                            | 0,39  |
| Q58EA6 | MCG10725, isoform CRA_a OS=Mus musculus GN=Rps25 PE=2 SV=1                                                                                 | 0,366 |
| P11983 | T-complex protein 1 subunit alpha OS=Mus musculus GN=Tcp1 PE=1 SV=3                                                                        | 0,365 |
| Q9JM93 | ADP-ribosylation factor-like protein 6-interacting protein 4 OS=Mus musculus GN=Arl6ip4 PE=1 SV=1                                          | 0,34  |
| Q5SQX6 | Cytoplasmic FMR1-interacting protein 2 OS=Mus musculus GN=Cyfp2 PE=1 SV=2                                                                  | 0,327 |
| F6YVP7 | Protein Gm10260 OS=Mus musculus GN=Gm10260 PE=3 SV=2                                                                                       | 0,286 |
| F6VPT0 | Protein Ccdc163 (Fragment) OS=Mus musculus GN=Ccdc163 PE=4 SV=1                                                                            | 0,284 |
| Q02105 | Complement C1q subcomponent subunit C OS=Mus musculus GN=C1qc PE=2 SV=2                                                                    | 0,274 |
| Q99MN9 | Propionyl-CoA carboxylase beta chain, mitochondrial OS=Mus musculus GN=Pccb PE=1 SV=2                                                      | 0,229 |
| Q3V0Q1 | Dynein heavy chain 12, axonemal OS=Mus musculus GN=Dnah12 PE=1 SV=2                                                                        | 0,227 |
| Q3TVK3 | Aspartyl aminopeptidase OS=Mus musculus GN=Dnpep PE=1 SV=1                                                                                 | 0,224 |
| Q9D8B3 | Charged multivesicular body protein 4b OS=Mus musculus GN=Chmp4b PE=1 SV=2                                                                 | 0,201 |
| Q8R1B4 | Eukaryotic translation initiation factor 3 subunit C OS=Mus musculus GN=EIF3C PE=1 SV=1                                                    | 0,189 |

# DATA FILE S1

## REGULATED PROTEINS 24 MONTHS: TG vs. WT

| Accession  | Description                                                                                                | Abundance Ratio: (TG24) / (WT24) |
|------------|------------------------------------------------------------------------------------------------------------|----------------------------------|
| P12023     | Amyloid beta A4 protein OS=Mus musculus GN=App PE=1 SV=3                                                   | 14,021                           |
| Q3SYP5     | Keratin 16 OS=Mus musculus GN=Krt16 PE=2 SV=1                                                              | 8,4                              |
| Q9Z331     | Keratin, type II cytoskeletal 6B OS=Mus musculus GN=Krt6b PE=1 SV=3                                        | 5,956                            |
| Q6IFX2     | Keratin, type I cytoskeletal 42 OS=Mus musculus GN=Krt42 PE=1 SV=1                                         | 5,635                            |
| Q9JIM93    | ADP-ribosylation factor-like protein 6-interacting protein 4 OS=Mus musculus GN=Arl6ip4 PE=1 SV=1          | 5,486                            |
| Q61782     | Type I epidermal keratin mRNA, 3'end (Fragment) OS=Mus musculus PE=2 SV=1                                  | 4,628                            |
| Q9QWL7     | Keratin, type I cytoskeletal 17 OS=Mus musculus GN=Krt17 PE=1 SV=3                                         | 4,351                            |
| Q99MN9     | Propionyl-CoA carboxylase beta chain, mitochondrial OS=Mus musculus GN=Pccb PE=1 SV=2                      | 3,96                             |
| Q9CZY3     | Ubiquitin-conjugating enzyme E2 variant 1 OS=Mus musculus GN=Ube2v1 PE=1 SV=1                              | 3,89                             |
| Q9WTL4     | Insulin receptor-related protein OS=Mus musculus GN=Insrr PE=1 SV=2                                        | 3,852                            |
| P62715     | Serine/threonine-protein phosphatase 2A catalytic subunit beta isoform OS=Mus musculus GN=Ppp2cb PE=1 SV=1 | 3,674                            |
| Q61781     | Keratin, type I cytoskeletal 14 OS=Mus musculus GN=Krt14 PE=1 SV=2                                         | 3,606                            |
| P19001     | Keratin, type I cytoskeletal 19 OS=Mus musculus GN=Krt19 PE=1 SV=1                                         | 3,598                            |
| Q3TXU4     | Apolipoprotein E, isoform CRA_h OS=Mus musculus GN=Apoe PE=2 SV=1                                          | 3,577                            |
| P43276     | Histone H1.5 OS=Mus musculus GN=Hist1h1b PE=1 SV=2                                                         | 3,402                            |
| P10637-3   | Isoform Tau-B of Microtubule-associated protein tau OS=Mus musculus GN=Mapt                                | 3,212                            |
| P14685     | 26S proteasome non-ATPase regulatory subunit 3 OS=Mus musculus GN=Psm3 PE=1 SV=3                           | 3,164                            |
| Q9D0M3     | Cytochrome c1, heme protein, mitochondrial OS=Mus musculus GN=Cyc1 PE=1 SV=1                               | 2,935                            |
| Q80YX1     | Tenascin OS=Mus musculus GN=Tnc PE=1 SV=1                                                                  | 2,749                            |
| Q9JLM8     | Serine/threonine-protein kinase DCLK1 OS=Mus musculus GN=Dclk1 PE=1 SV=1                                   | 2,736                            |
| A0A140T8K6 | 60S ribosomal protein L36 OS=Mus musculus GN=Rpl36-ps3 PE=3 SV=1                                           | 2,694                            |
| P12787     | Cytochrome c oxidase subunit 5A, mitochondrial OS=Mus musculus GN=Cox5a PE=1 SV=2                          | 2,555                            |
| Q3V0Q1     | Dynein heavy chain 12, axonemal OS=Mus musculus GN=Dnah12 PE=1 SV=2                                        | 2,526                            |
| Q91VE0     | Long-chain fatty acid transport protein 4 OS=Mus musculus GN=Slc27a4 PE=1 SV=1                             | 2,47                             |
| Q564G0     | Guanylate kinase OS=Mus musculus GN=Guk1 PE=1 SV=1                                                         | 2,384                            |
| Q8R366     | Immunoglobulin superfamily member 8 OS=Mus musculus GN=Igsf8 PE=1 SV=2                                     | 2,374                            |
| E9Q557     | Desmoplakin OS=Mus musculus GN=Dsp PE=1 SV=1                                                               | 2,319                            |
| Q9D823     | 60S ribosomal protein L37 OS=Mus musculus GN=Rpl37 PE=3 SV=3                                               | 2,302                            |
| P62855     | 40S ribosomal protein S26 OS=Mus musculus GN=Rps26 PE=1 SV=3                                               | 2,296                            |
| Q32P04     | Keratin 5 OS=Mus musculus GN=Krt5 PE=2 SV=2                                                                | 2,268                            |
| Q8R1B4     | Eukaryotic translation initiation factor 3 subunit C OS=Mus musculus GN=Eif3c PE=1 SV=1                    | 2,204                            |
| Q8C1Y8     | Vacuolar fusion protein CCZ1 homolog OS=Mus musculus GN=Ccz1 PE=1 SV=1                                     | 2,201                            |
| V9GX76     | Unconventional myosin-VI OS=Mus musculus GN=Myo6 PE=1 SV=1                                                 | 2,143                            |
| Q9CXS4     | Centromere protein V OS=Mus musculus GN=Cenpv PE=1 SV=2                                                    | 2,142                            |
| Q9QXS1     | Plectin OS=Mus musculus GN=Plec PE=1 SV=3                                                                  | 2,138                            |
| P62717     | 60S ribosomal protein L18a OS=Mus musculus GN=Rpl18a PE=1 SV=1                                             | 2,133                            |
| P62307     | Small nuclear ribonucleoprotein F OS=Mus musculus GN=Snrpf PE=1 SV=1                                       | 2,066                            |
| Q9CYR0     | Single-stranded DNA-binding protein, mitochondrial OS=Mus musculus GN=Ssbp1 PE=1 SV=1                      | 2,033                            |

|            |                                                                                                                                            |       |
|------------|--------------------------------------------------------------------------------------------------------------------------------------------|-------|
| Q8C522     | Endonuclease domain-containing 1 protein OS=Mus musculus GN=Endod1 PE=1 SV=2                                                               | 2,031 |
| P97499     | Telomerase protein component 1 OS=Mus musculus GN=Tel1 PE=1 SV=1                                                                           | 2,01  |
| Q9R062     | Glycogenin-1 OS=Mus musculus GN=Gyg1 PE=1 SV=3                                                                                             | 1,985 |
| Q9QWI6     | SRC kinase signaling inhibitor 1 OS=Mus musculus GN=Srcin1 PE=1 SV=2                                                                       | 1,98  |
| P63163     | Small nuclear ribonucleoprotein-associated protein N OS=Mus musculus GN=Snrpn PE=2 SV=1                                                    | 1,948 |
| P17427     | AP-2 complex subunit alpha-2 OS=Mus musculus GN=Ap2a2 PE=1 SV=2                                                                            | 1,948 |
| Q5BLK0     | MCG18564, isoform CRA_a OS=Mus musculus GN=Rpl12 PE=2 SV=1                                                                                 | 1,948 |
| J3QMG3     | Voltage-dependent anion-selective channel protein 3 OS=Mus musculus GN=Vdac3 PE=1 SV=1                                                     | 1,911 |
| Q9DCW4     | Electron transfer flavoprotein subunit beta OS=Mus musculus GN=Etfb PE=1 SV=3                                                              | 1,906 |
| Q58EW0     | 60S ribosomal protein L18 OS=Mus musculus GN=Rpl18 PE=2 SV=1                                                                               | 1,886 |
| Q8BMF4     | Dihydrolipoyllysine-residue acetyltransferase component of pyruvate dehydrogenase complex, mitochondrial OS=Mus musculus GN=Dlat PE=1 SV=2 | 1,856 |
| Q9Z0H4     | CUGBP Elav-like family member 2 OS=Mus musculus GN=Celf2 PE=1 SV=1                                                                         | 1,845 |
| P46660     | Alpha-internexin OS=Mus musculus GN=Ina PE=1 SV=3                                                                                          | 1,828 |
| P08752     | Guanine nucleotide-binding protein G(i) subunit alpha-2 OS=Mus musculus GN=Gnai2 PE=1 SV=5                                                 | 1,823 |
| Q549A5     | Clusterin OS=Mus musculus GN=Clu PE=2 SV=1                                                                                                 | 1,822 |
| Q8BTI8     | Serine/arginine repetitive matrix protein 2 OS=Mus musculus GN=Srrm2 PE=1 SV=3                                                             | 1,819 |
| Q3TI05     | Chaperonin containing Tcp1, subunit 6a (Zeta) OS=Mus musculus GN=Cct6a PE=2 SV=1                                                           | 1,814 |
| O55091     | Protein IMPACT OS=Mus musculus GN=Impact PE=1 SV=2                                                                                         | 1,778 |
| F6TYB7     | Myelin basic protein (Fragment) OS=Mus musculus GN=Mbp PE=1 SV=1                                                                           | 1,776 |
| Q04690     | Neurofibromin OS=Mus musculus GN=Nf1 PE=1 SV=1                                                                                             | 1,722 |
| P03995     | Glial fibrillary acidic protein OS=Mus musculus GN=Gfap PE=1 SV=4                                                                          | 1,694 |
| E9Q401     | Ryanodine receptor 2 OS=Mus musculus GN=Ryr2 PE=1 SV=1                                                                                     | 1,689 |
| Q5BLJ9     | 60S ribosomal protein L27 OS=Mus musculus GN=Rpl27 PE=2 SV=1                                                                               | 1,688 |
| A2CEK3     | Phosphoglucomutase-2 OS=Mus musculus GN=Pgm2 PE=1 SV=1                                                                                     | 1,675 |
| P61514     | 60S ribosomal protein L37a OS=Mus musculus GN=Rpl37a PE=3 SV=2                                                                             | 1,667 |
| Q505A8     | MCG17585 OS=Mus musculus GN=Rpl39 PE=2 SV=1                                                                                                | 1,64  |
| P11983     | T-complex protein 1 subunit alpha OS=Mus musculus GN=Tcp1 PE=1 SV=3                                                                        | 1,637 |
| Q9D0M5     | Dynein light chain 2, cytoplasmic OS=Mus musculus GN=Dynll2 PE=1 SV=1                                                                      | 1,626 |
| Q5M9J8     | MCG13936 OS=Mus musculus GN=Rpl28 PE=2 SV=1                                                                                                | 1,621 |
| P31938     | Dual specificity mitogen-activated protein kinase kinase 1 OS=Mus musculus GN=Map2k1 PE=1 SV=2                                             | 1,596 |
| Q8BGT8     | Phytanoyl-CoA hydroxylase-interacting protein-like OS=Mus musculus GN=Phyhipl PE=2 SV=1                                                    | 1,584 |
| E9PYK3     | Poly [ADP-ribose] polymerase OS=Mus musculus GN=Parp4 PE=1 SV=1                                                                            | 1,583 |
| Q4VAG4     | MCG12304 OS=Mus musculus GN=Rpl22 PE=2 SV=1                                                                                                | 1,575 |
| Q8BL66     | Early endosome antigen 1 OS=Mus musculus GN=Eea1 PE=1 SV=2                                                                                 | 1,564 |
| P11881     | Inositol 1,4,5-trisphosphate receptor type 1 OS=Mus musculus GN=Itpr1 PE=1 SV=2                                                            | 1,562 |
| P12382     | ATP-dependent 6-phosphofructokinase, liver type OS=Mus musculus GN=Pfkl PE=1 SV=4                                                          | 1,544 |
| P62320     | Small nuclear ribonucleoprotein Sm D3 OS=Mus musculus GN=Snrpd3 PE=1 SV=1                                                                  | 1,523 |
| AOA0A0MQA5 | Tubulin alpha chain (Fragment) OS=Mus musculus GN=Tuba4a PE=1 SV=1                                                                         | 1,516 |
| Q2PFD7     | PH and SEC7 domain-containing protein 3 OS=Mus musculus GN=Psd3 PE=1 SV=2                                                                  | 1,487 |
| Q9JHU4     | Cytoplasmic dynein 1 heavy chain 1 OS=Mus musculus GN=Dync1h1 PE=1 SV=2                                                                    | 1,48  |
| P63318     | Protein kinase C gamma type OS=Mus musculus GN=Prkcg PE=1 SV=1                                                                             | 1,476 |
| P14106     | Complement C1q subcomponent subunit B OS=Mus musculus GN=C1qb PE=1 SV=2                                                                    | 1,473 |

|            |                                                                                                    |       |
|------------|----------------------------------------------------------------------------------------------------|-------|
| P01592     | Immunoglobulin J chain OS=Mus musculus GN=Igj PE=2 SV=4                                            | 1,472 |
| Q8VDD5     | Myosin-9 OS=Mus musculus GN=Myh9 PE=1 SV=4                                                         | 1,471 |
| Q3TQ70     | Beta1 subunit of GTP-binding protein OS=Mus musculus GN=Gnb1 PE=2 SV=1                             | 1,468 |
| P62918     | 60S ribosomal protein L8 OS=Mus musculus GN=Rpl8 PE=1 SV=2                                         | 1,461 |
| P86048     | 60S ribosomal protein L10-like OS=Mus musculus GN=Rpl10l PE=2 SV=1                                 | 1,461 |
| Q8BMS1     | Trifunctional enzyme subunit alpha, mitochondrial OS=Mus musculus GN=Hadha PE=1 SV=1               | 1,458 |
| P14148     | 60S ribosomal protein L7 OS=Mus musculus GN=Rpl7 PE=1 SV=2                                         | 1,449 |
| Q9CR57     | 60S ribosomal protein L14 OS=Mus musculus GN=Rpl14 PE=1 SV=3                                       | 1,443 |
| Q9EQK5     | Major vault protein OS=Mus musculus GN=Mvp PE=1 SV=4                                               | 1,426 |
| A0A097PUG4 | Anti-lox-1.15C4 light chain OS=Mus musculus PE=2 SV=1                                              | 1,416 |
| A2AQR0     | Glycerol-3-phosphate dehydrogenase OS=Mus musculus GN=Gpd2 PE=1 SV=1                               | 1,412 |
| E9Q8N8     | Anion exchange protein OS=Mus musculus GN=Slc4a4 PE=1 SV=1                                         | 1,409 |
| P27773     | Protein disulfide-isomerase A3 OS=Mus musculus GN=Pdia3 PE=1 SV=2                                  | 1,396 |
| Q9R1P3     | Proteasome subunit beta type-2 OS=Mus musculus GN=Psmb2 PE=1 SV=1                                  | 1,395 |
| Q0VF55     | Calcium-transporting ATPase OS=Mus musculus GN=Atp2b3 PE=1 SV=1                                    | 1,393 |
| Q9WV34     | MAGUK p55 subfamily member 2 OS=Mus musculus GN=Mpp2 PE=1 SV=1                                     | 1,391 |
| P27659     | 60S ribosomal protein L3 OS=Mus musculus GN=Rpl3 PE=1 SV=3                                         | 1,384 |
| Q8BH58     | TIP41-like protein OS=Mus musculus GN=Tipr1 PE=1 SV=1                                              | 1,384 |
| P62267     | 40S ribosomal protein S23 OS=Mus musculus GN=Rps23 PE=1 SV=3                                       | 1,379 |
| Q9CQV8     | 14-3-3 protein beta/alpha OS=Mus musculus GN=Ywhab PE=1 SV=3                                       | 1,378 |
| Q99104     | Unconventional myosin-Va OS=Mus musculus GN=Myo5a PE=1 SV=2                                        | 1,378 |
| Q4FJX4     | Csrp1 protein OS=Mus musculus GN=Csrp1 PE=2 SV=1                                                   | 1,375 |
| Q9WUB3     | Glycogen phosphorylase, muscle form OS=Mus musculus GN=Pygm PE=1 SV=3                              | 1,374 |
| Q3UNV7     | Putative uncharacterized protein OS=Mus musculus GN=Mlf2 PE=2 SV=1                                 | 1,373 |
| P20152     | Vimentin OS=Mus musculus GN=Vim PE=1 SV=3                                                          | 1,368 |
| P62880     | Guanine nucleotide-binding protein G(I)/G(S)/G(T) subunit beta-2 OS=Mus musculus GN=Gnb2 PE=1 SV=3 | 1,368 |
| Q3U7E0     | Putative uncharacterized protein OS=Mus musculus GN=Atp6v1g1 PE=2 SV=1                             | 1,364 |
| P49722     | Proteasome subunit alpha type-2 OS=Mus musculus GN=Psm2 PE=1 SV=3                                  | 1,356 |
| P19096     | Fatty acid synthase OS=Mus musculus GN=Fasn PE=1 SV=2                                              | 1,355 |
| Q9DAK9     | 14 kDa phosphohistidine phosphatase OS=Mus musculus GN=Phpt1 PE=1 SV=1                             | 1,355 |
| P62827     | GTP-binding nuclear protein Ran OS=Mus musculus GN=Ran PE=1 SV=3                                   | 1,343 |
| O08788     | Dynactin subunit 1 OS=Mus musculus GN=Dctn1 PE=1 SV=3                                              | 1,341 |
| P29341     | Polyadenylate-binding protein 1 OS=Mus musculus GN=Pabpc1 PE=1 SV=2                                | 1,34  |
| P56480     | ATP synthase subunit beta, mitochondrial OS=Mus musculus GN=Atp5b PE=1 SV=2                        | 1,335 |
| Q3UH59     | Myosin-10 OS=Mus musculus GN=Myh10 PE=1 SV=1                                                       | 1,334 |
| Q497E9     | 40S ribosomal protein S8 OS=Mus musculus GN=Rps8 PE=2 SV=1                                         | 1,325 |
| P62305     | Small nuclear ribonucleoprotein E OS=Mus musculus GN=Snrpe PE=1 SV=1                               | 1,322 |
| Q61838     | Alpha-2-macroglobulin OS=Mus musculus GN=A2m PE=1 SV=3                                             | 1,32  |
| P63085     | Mitogen-activated protein kinase 1 OS=Mus musculus GN=Mapk1 PE=1 SV=3                              | 1,32  |
| Q55QX6     | Cytoplasmic FMR1-interacting protein 2 OS=Mus musculus GN=Cyfp2 PE=1 SV=2                          | 1,319 |
| P68040     | Receptor of activated protein C kinase 1 OS=Mus musculus GN=Rack1 PE=1 SV=3                        | 1,313 |
| O70318     | Band 4.1-like protein 2 OS=Mus musculus GN=Epb41l2 PE=1 SV=2                                       | 1,31  |

|            |                                                                                                                   |       |
|------------|-------------------------------------------------------------------------------------------------------------------|-------|
| Q9QZQ8     | Core histone macro-H2A.1 OS=Mus musculus GN=H2afy PE=1 SV=3                                                       | 1,308 |
| Q8VEK3     | Heterogeneous nuclear ribonucleoprotein U OS=Mus musculus GN=Hnrnpu PE=1 SV=1                                     | 1,305 |
| Q9JIS5     | Synaptic vesicle glycoprotein 2A OS=Mus musculus GN=Sv2a PE=1 SV=1                                                | 1,302 |
| Q548L4     | Glutamate decarboxylase OS=Mus musculus GN=Gad2 PE=2 SV=1                                                         | 0,774 |
| P19253     | 60S ribosomal protein L13a OS=Mus musculus GN=Rpl13a PE=1 SV=4                                                    | 0,772 |
| Q91V12-2   | Isoform A of Cytosolic acyl coenzyme A thioester hydrolase OS=Mus musculus GN=Acot7                               | 0,771 |
| A0A075B6A0 | Ig mu chain C region (Fragment) OS=Mus musculus GN=Ighm PE=1 SV=2                                                 | 0,77  |
| P60202     | Myelin proteolipid protein OS=Mus musculus GN=Plp1 PE=1 SV=2                                                      | 0,77  |
| P47963     | 60S ribosomal protein L13 OS=Mus musculus GN=Rpl13 PE=1 SV=3                                                      | 0,763 |
| P06745     | Glucose-6-phosphate isomerase OS=Mus musculus GN=Gpi PE=1 SV=4                                                    | 0,762 |
| Q5YLW3     | Ribosomal protein S3 OS=Mus musculus GN=Rps3 PE=2 SV=1                                                            | 0,762 |
| P47962     | 60S ribosomal protein L5 OS=Mus musculus GN=Rpl5 PE=1 SV=3                                                        | 0,756 |
| B2RTM0     | Histone H4 OS=Mus musculus GN=Hist2h4 PE=2 SV=1                                                                   | 0,753 |
| Q9D051     | Pyruvate dehydrogenase E1 component subunit beta, mitochondrial OS=Mus musculus GN=Pdhb PE=1 SV=1                 | 0,753 |
| P17710     | Hexokinase-1 OS=Mus musculus GN=Hk1 PE=1 SV=3                                                                     | 0,749 |
| P28738     | Kinesin heavy chain isoform 5C OS=Mus musculus GN=Kif5c PE=1 SV=3                                                 | 0,746 |
| P62281     | 40S ribosomal protein S11 OS=Mus musculus GN=Rps11 PE=1 SV=3                                                      | 0,743 |
| P21460     | Cystatin-C OS=Mus musculus GN=Cst3 PE=1 SV=2                                                                      | 0,742 |
| O08553     | Dihydropyrimidinase-related protein 2 OS=Mus musculus GN=Dpysl2 PE=1 SV=2                                         | 0,735 |
| P97351     | 40S ribosomal protein S3a OS=Mus musculus GN=Rps3a PE=1 SV=3                                                      | 0,735 |
| P35486     | Pyruvate dehydrogenase E1 component subunit alpha, somatic form, mitochondrial OS=Mus musculus GN=Pdha1 PE=1 SV=1 | 0,734 |
| Q9CPU0     | Lactoylglutathione lyase OS=Mus musculus GN=Glo1 PE=1 SV=3                                                        | 0,732 |
| Q7TSJ2     | Microtubule-associated protein 6 OS=Mus musculus GN=Map6 PE=1 SV=2                                                | 0,732 |
| Q80YN3     | Breast carcinoma-amplified sequence 1 homolog OS=Mus musculus GN=Bcas1 PE=1 SV=3                                  | 0,731 |
| P62137     | Serine/threonine-protein phosphatase PP1-alpha catalytic subunit OS=Mus musculus GN=Ppp1ca PE=1 SV=1              | 0,731 |
| Q8K183     | Pyridoxal kinase OS=Mus musculus GN=Pdxk PE=1 SV=1                                                                | 0,729 |
| Q02105     | Complement C1q subcomponent subunit C OS=Mus musculus GN=C1qc PE=2 SV=2                                           | 0,728 |
| Q9D8B3     | Charged multivesicular body protein 4b OS=Mus musculus GN=Chmp4b PE=1 SV=2                                        | 0,728 |
| Q3TVK3     | Aspartyl aminopeptidase OS=Mus musculus GN=Dnpep PE=1 SV=1                                                        | 0,727 |
| Q7TMM9     | Tubulin beta-2A chain OS=Mus musculus GN=Tubb2a PE=1 SV=1                                                         | 0,724 |
| B9EHN0     | Ubiquitin-activating enzyme E1, Chr X OS=Mus musculus GN=Uba1 PE=2 SV=1                                           | 0,721 |
| P70349     | Histidine triad nucleotide-binding protein 1 OS=Mus musculus GN=Hint1 PE=1 SV=3                                   | 0,716 |
| Q80Y52     | Heat shock protein 90, alpha (Cytosolic), class A member 1 OS=Mus musculus GN=Hsp90aa1 PE=2 SV=2                  | 0,716 |
| G5E902     | MCG10343, isoform CRA_b OS=Mus musculus GN=Slc25a3 PE=1 SV=1                                                      | 0,71  |
| H3BKH6     | S-formylglutathione hydrolase OS=Mus musculus GN=Esd PE=1 SV=1                                                    | 0,709 |
| P63017     | Heat shock cognate 71 kDa protein OS=Mus musculus GN=Hspa8 PE=1 SV=1                                              | 0,708 |
| F6RSK3     | Protein Gm17430 OS=Mus musculus GN=Gm17430 PE=4 SV=1                                                              | 0,705 |
| Q7M6W1     | Reticulon OS=Mus musculus GN=Rtn1 PE=1 SV=1                                                                       | 0,705 |
| O55042     | Alpha-synuclein OS=Mus musculus GN=SncA PE=1 SV=2                                                                 | 0,704 |
| F6YVP7     | Protein Gm10260 OS=Mus musculus GN=Gm10260 PE=3 SV=2                                                              | 0,704 |
| Q546G4     | Albumin 1 OS=Mus musculus GN=Alb PE=2 SV=1                                                                        | 0,703 |
| P70202     | Latexin OS=Mus musculus GN=Lxn PE=1 SV=2                                                                          | 0,703 |



|            |                                                                                                   |       |
|------------|---------------------------------------------------------------------------------------------------|-------|
| P50396     | Rab GDP dissociation inhibitor alpha OS=Mus musculus GN=Gdi1 PE=1 SV=3                            | 0,701 |
| Q810U4     | Neuronal cell adhesion molecule OS=Mus musculus GN=Nrcam PE=1 SV=2                                | 0,699 |
| P11499     | Heat shock protein HSP 90-beta OS=Mus musculus GN=Hsp90ab1 PE=1 SV=3                              | 0,699 |
| Q542X7     | Chaperonin subunit 2 (Beta), isoform CRA_a OS=Mus musculus GN=Cct2 PE=2 SV=1                      | 0,699 |
| Q642L7     | MCG13441 OS=Mus musculus GN=Rps27a PE=2 SV=1                                                      | 0,692 |
| A2ARP8     | Microtubule-associated protein 1A OS=Mus musculus GN=Map1a PE=1 SV=1                              | 0,692 |
| P99028     | Cytochrome b-c1 complex subunit 6, mitochondrial OS=Mus musculus GN=Uqcrh PE=1 SV=2               | 0,691 |
| Q3UMU9     | Hepatoma-derived growth factor-related protein 2 OS=Mus musculus GN=Hdgfrp2 PE=1 SV=1             | 0,69  |
| D0VYV6     | Erythrocyte protein band 4.1-like 3 isoform B OS=Mus musculus GN=Epb4.1i3 PE=2 SV=1               | 0,689 |
| P57780     | Alpha-actinin-4 OS=Mus musculus GN=Actn4 PE=1 SV=1                                                | 0,686 |
| A2ALV3     | Endophilin-A1 OS=Mus musculus GN=Sh3gl2 PE=1 SV=1                                                 | 0,68  |
| Q9Z204     | Heterogeneous nuclear ribonucleoproteins C1/C2 OS=Mus musculus GN=Hnrnpc PE=1 SV=1                | 0,679 |
| Q91VB8     | Alpha globin 1 OS=Mus musculus GN=haemaglobin alpha 2 PE=1 SV=1                                   | 0,67  |
| P17742     | Peptidyl-prolyl cis-trans isomerase A OS=Mus musculus GN=Ppia PE=1 SV=2                           | 0,669 |
| Q9Z1G4     | V-type proton ATPase 116 kDa subunit a isoform 1 OS=Mus musculus GN=Atp6v0a1 PE=1 SV=3            | 0,669 |
| Q01853     | Transitional endoplasmic reticulum ATPase OS=Mus musculus GN=Vcp PE=1 SV=4                        | 0,668 |
| Q3V117     | ATP-citrate synthase OS=Mus musculus GN=Acly PE=1 SV=1                                            | 0,665 |
| Q9ERD7     | Tubulin beta-3 chain OS=Mus musculus GN=Tubb3 PE=1 SV=1                                           | 0,665 |
| P28651     | Carbonic anhydrase-related protein OS=Mus musculus GN=Ca8 PE=1 SV=5                               | 0,664 |
| Q9Z2T6     | Keratin, type II cuticular Hb5 OS=Mus musculus GN=Krt85 PE=2 SV=2                                 | 0,66  |
| P52480     | Pyruvate kinase PKM OS=Mus musculus GN=Pkm PE=1 SV=4                                              | 0,659 |
| Q58E64     | Elongation factor 1-alpha OS=Mus musculus GN=Eef1a1 PE=2 SV=1                                     | 0,658 |
| Q9D6R2     | Isocitrate dehydrogenase [NAD] subunit alpha, mitochondrial OS=Mus musculus GN=Idh3a PE=1 SV=1    | 0,657 |
| Q60829     | Protein phosphatase 1 regulatory subunit 1B OS=Mus musculus GN=Ppp1r1b PE=2 SV=2                  | 0,656 |
| Q7TQD2     | Tubulin polymerization-promoting protein OS=Mus musculus GN=Tppp PE=1 SV=1                        | 0,656 |
| AOA087WQN2 | Prothymosin alpha (Fragment) OS=Mus musculus GN=Ptma PE=1 SV=1                                    | 0,654 |
| P62082     | 40S ribosomal protein S7 OS=Mus musculus GN=Rps7 PE=2 SV=1                                        | 0,654 |
| B0QZN5     | Vesicle-associated membrane protein 2 OS=Mus musculus GN=Vamp2 PE=1 SV=1                          | 0,648 |
| P68369     | Tubulin alpha-1A chain OS=Mus musculus GN=Tuba1a PE=1 SV=1                                        | 0,648 |
| Q08331     | Calretinin OS=Mus musculus GN=Calb2 PE=1 SV=3                                                     | 0,647 |
| P26443     | Glutamate dehydrogenase 1, mitochondrial OS=Mus musculus GN=Glud1 PE=1 SV=1                       | 0,646 |
| P01787     | Ig heavy chain V regions TEPC 15/S107/HPCM1/HPCM2/HPCM3 OS=Mus musculus PE=1 SV=1                 | 0,644 |
| P61255     | 60S ribosomal protein L26 OS=Mus musculus GN=Rpl26 PE=1 SV=1                                      | 0,644 |
| D3Z722     | 40S ribosomal protein S19 OS=Mus musculus GN=Rps19 PE=1 SV=1                                      | 0,637 |
| B9EKR1     | Receptor-type tyrosine-protein phosphatase zeta OS=Mus musculus GN=Ptprz1 PE=1 SV=1               | 0,635 |
| P63005     | Platelet-activating factor acetylhydrolase IB subunit alpha OS=Mus musculus GN=Pafah1b1 PE=1 SV=2 | 0,629 |
| Q5SXR6     | Clathrin heavy chain OS=Mus musculus GN=Cltc PE=1 SV=1                                            | 0,621 |
| P18872     | Guanine nucleotide-binding protein G(o) subunit alpha OS=Mus musculus GN=Gnao1 PE=1 SV=3          | 0,619 |
| Q60864     | Stress-induced-phosphoprotein 1 OS=Mus musculus GN=Stip1 PE=1 SV=1                                | 0,612 |
| P62889     | 60S ribosomal protein L30 OS=Mus musculus GN=Rpl30 PE=1 SV=2                                      | 0,611 |
| F6RT34     | Myelin basic protein (Fragment) OS=Mus musculus GN=Mbp PE=1 SV=1                                  | 0,61  |
| O54962     | Barrier-to-autointegration factor OS=Mus musculus GN=Banf1 PE=1 SV=1                              | 0,608 |

|            |                                                                                                                        |       |
|------------|------------------------------------------------------------------------------------------------------------------------|-------|
| A8DUK4     | Beta-globin OS=Mus musculus GN=Hbht1 PE=1 SV=1                                                                         | 0,603 |
| P62259     | 14-3-3 protein epsilon OS=Mus musculus GN=Ywhae PE=1 SV=1                                                              | 0,603 |
| Q9D6F9     | Tubulin beta-4A chain OS=Mus musculus GN=Tubb4a PE=1 SV=3                                                              | 0,6   |
| Q99PT1     | Rho GDP-dissociation inhibitor 1 OS=Mus musculus GN=Arhgdia PE=1 SV=3                                                  | 0,596 |
| Q9JLZ3     | Methylglutaconyl-CoA hydratase, mitochondrial OS=Mus musculus GN=Auh PE=1 SV=1                                         | 0,596 |
| Q9QYX7     | Protein piccolo OS=Mus musculus GN=Pclo PE=1 SV=4                                                                      | 0,596 |
| Q04447     | Creatine kinase B-type OS=Mus musculus GN=Ckb PE=1 SV=1                                                                | 0,595 |
| Q8K0U4     | Heat shock 70 kDa protein 12A OS=Mus musculus GN=Hspa12a PE=1 SV=1                                                     | 0,595 |
| F6VW30     | 14-3-3 protein theta (Fragment) OS=Mus musculus GN=Ywhaq PE=1 SV=1                                                     | 0,594 |
| P14873     | Microtubule-associated protein 1B OS=Mus musculus GN=Map1b PE=1 SV=2                                                   | 0,591 |
| Q548F2     | Guanine deaminase OS=Mus musculus GN=Gda PE=2 SV=1                                                                     | 0,59  |
| A0A075B5P2 | Protein Igkc (Fragment) OS=Mus musculus GN=Igkc PE=1 SV=1                                                              | 0,59  |
| A0A0A6YXW6 | Protein Igha (Fragment) OS=Mus musculus GN=Igha PE=1 SV=1                                                              | 0,589 |
| F8WGL3     | Cofilin-1 OS=Mus musculus GN=Cfl1 PE=1 SV=1                                                                            | 0,584 |
| Q76MZ3     | Serine/threonine-protein phosphatase 2A 65 kDa regulatory subunit A alpha isoform OS=Mus musculus GN=Ppp2r1a PE=1 SV=3 | 0,584 |
| P09411     | Phosphoglycerate kinase 1 OS=Mus musculus GN=Pgk1 PE=1 SV=4                                                            | 0,584 |
| P05063     | Fructose-bisphosphate aldolase C OS=Mus musculus GN=Aldoc PE=1 SV=4                                                    | 0,583 |
| P58252     | Elongation factor 2 OS=Mus musculus GN=Eef2 PE=1 SV=2                                                                  | 0,583 |
| Q6W8Q3     | Purkinje cell protein 4-like protein 1 OS=Mus musculus GN=Pcp4l1 PE=1 SV=1                                             | 0,582 |
| Q9DBJ1     | Phosphoglycerate mutase 1 OS=Mus musculus GN=Pgam1 PE=1 SV=3                                                           | 0,579 |
| Q99KI0     | Aconitate hydratase, mitochondrial OS=Mus musculus GN=Aco2 PE=1 SV=1                                                   | 0,579 |
| P27661     | Histone H2AX OS=Mus musculus GN=H2afx PE=1 SV=2                                                                        | 0,577 |
| P60766     | Cell division control protein 42 homolog OS=Mus musculus GN=Cdc42 PE=1 SV=2                                            | 0,577 |
| P52760     | Ribonuclease UK114 OS=Mus musculus GN=Hrsp12 PE=1 SV=3                                                                 | 0,576 |
| Q5EBQ2     | MCG7941, isoform CRA_f OS=Mus musculus GN=Pebp1 PE=2 SV=1                                                              | 0,576 |
| Q545B6     | Stathmin OS=Mus musculus GN=Stmn1 PE=2 SV=1                                                                            | 0,574 |
| P20357     | Microtubule-associated protein 2 OS=Mus musculus GN=Map2 PE=1 SV=2                                                     | 0,574 |
| P62858     | 40S ribosomal protein S28 OS=Mus musculus GN=Rps28 PE=1 SV=1                                                           | 0,574 |
| Q545P0     | ATPase, Na <sup>+</sup> /K <sup>+</sup> transporting, beta 1 polypeptide OS=Mus musculus GN=Atp1b1 PE=2 SV=1           | 0,565 |
| A0A087WP80 | Limbic system-associated membrane protein OS=Mus musculus GN=Lsamp PE=1 SV=1                                           | 0,559 |
| Q9R0Y5     | Adenylate kinase isoenzyme 1 OS=Mus musculus GN=Ak1 PE=1 SV=1                                                          | 0,559 |
| Q3UL22     | Chaperonin subunit 8 (Theta), isoform CRA_a OS=Mus musculus GN=Cct8 PE=2 SV=1                                          | 0,557 |
| P35700     | Peroxiredoxin-1 OS=Mus musculus GN=Prdx1 PE=1 SV=1                                                                     | 0,556 |
| P16125     | L-lactate dehydrogenase B chain OS=Mus musculus GN=Ldhb PE=1 SV=2                                                      | 0,552 |
| P10649     | Glutathione S-transferase Mu 1 OS=Mus musculus GN=Gstm1 PE=1 SV=2                                                      | 0,55  |
| D3Z4B2     | Gamma-soluble NSF attachment protein (Fragment) OS=Mus musculus GN=Napg PE=1 SV=1                                      | 0,545 |
| P98086     | Complement C1q subcomponent subunit A OS=Mus musculus GN=C1qa PE=1 SV=2                                                | 0,542 |
| P08249     | Malate dehydrogenase, mitochondrial OS=Mus musculus GN=Mdh2 PE=1 SV=3                                                  | 0,542 |
| Q61361     | Brevican core protein OS=Mus musculus GN=Bcan PE=1 SV=2                                                                | 0,54  |
| P63101     | 14-3-3 protein zeta/delta OS=Mus musculus GN=Ywhaz PE=1 SV=1                                                           | 0,537 |
| E9VPPO     | PCTP-like protein OS=Mus musculus GN=Stard10 PE=1 SV=1                                                                 | 0,537 |
| Q91ZZ3     | Beta-synuclein OS=Mus musculus GN=Sncb PE=1 SV=1                                                                       | 0,535 |

|            |                                                                                       |       |
|------------|---------------------------------------------------------------------------------------|-------|
| P62631     | Elongation factor 1-alpha 2 OS=Mus musculus GN=Eef1a2 PE=1 SV=1                       | 0,533 |
| Q9DBG3     | AP-2 complex subunit beta OS=Mus musculus GN=Ap2b1 PE=1 SV=1                          | 0,532 |
| P51863     | V-type proton ATPase subunit d 1 OS=Mus musculus GN=Atp6v0d1 PE=1 SV=2                | 0,531 |
| P60710     | Actin, cytoplasmic 1 OS=Mus musculus GN=Actb PE=1 SV=1                                | 0,531 |
| P68433     | Histone H3.1 OS=Mus musculus GN=Hist1h3a PE=1 SV=2                                    | 0,525 |
| Q3UY00     | Protein S100 OS=Mus musculus GN=S100b PE=2 SV=1                                       | 0,517 |
| Q3U1N0     | Coronin OS=Mus musculus GN=Coro1a PE=2 SV=1                                           | 0,512 |
| Q5FW97     | Enolase 1, alpha non-neuron OS=Mus musculus GN=EG433182 PE=2 SV=1                     | 0,511 |
| E9PZF0     | Nucleoside diphosphate kinase OS=Mus musculus GN=Gm20390 PE=3 SV=1                    | 0,51  |
| A6ZI44     | Fructose-bisphosphate aldolase OS=Mus musculus GN=Aldoa PE=1 SV=1                     | 0,507 |
| Q3U2G2     | Heat shock 70 kDa protein 4 OS=Mus musculus GN=Hspa4 PE=1 SV=1                        | 0,505 |
| P09405     | Nucleolin OS=Mus musculus GN=Ncl PE=1 SV=2                                            | 0,504 |
| P61922     | 4-aminobutyrate aminotransferase, mitochondrial OS=Mus musculus GN=Abat PE=1 SV=1     | 0,498 |
| Q9Z2D6-2   | Isoform B of Methyl-CpG-binding protein 2 OS=Mus musculus GN=Mecp2                    | 0,496 |
| P80313     | T-complex protein 1 subunit eta OS=Mus musculus GN=Cct7 PE=1 SV=1                     | 0,496 |
| Q149Z9     | Histone cluster 1, H1d OS=Mus musculus GN=Hist1h1d PE=2 SV=1                          | 0,492 |
| P17751     | Triosephosphate isomerase OS=Mus musculus GN=Tpi1 PE=1 SV=4                           | 0,492 |
| Q9R0P9     | Ubiquitin carboxyl-terminal hydrolase isozyme L1 OS=Mus musculus GN=Uchl1 PE=1 SV=1   | 0,489 |
| Q9EQU5-2   | Isoform 2 of Protein SET OS=Mus musculus GN=Set                                       | 0,486 |
| Q8C2Q7     | Heterogeneous nuclear ribonucleoprotein H OS=Mus musculus GN=Hnrnph1 PE=1 SV=1        | 0,483 |
| Q9JJV2     | Profilin-2 OS=Mus musculus GN=Pfn2 PE=1 SV=3                                          | 0,483 |
| P68372     | Tubulin beta-4B chain OS=Mus musculus GN=Tubb4b PE=1 SV=1                             | 0,48  |
| Q60668     | Heterogeneous nuclear ribonucleoprotein D0 OS=Mus musculus GN=Hnrnpd PE=1 SV=2        | 0,479 |
| Q8BVI4     | Dihydropteridine reductase OS=Mus musculus GN=Qdpr PE=1 SV=2                          | 0,478 |
| Q543Y7     | Putative uncharacterized protein OS=Mus musculus GN=Pacsin1 PE=2 SV=1                 | 0,471 |
| P28474     | Alcohol dehydrogenase class-3 OS=Mus musculus GN=Adh5 PE=1 SV=3                       | 0,465 |
| P14869     | 60S acidic ribosomal protein P0 OS=Mus musculus GN=Rplp0 PE=1 SV=3                    | 0,464 |
| P61979     | Heterogeneous nuclear ribonucleoprotein K OS=Mus musculus GN=Hnrnpk PE=1 SV=1         | 0,463 |
| Q6GT24     | Peroxiredoxin 6 OS=Mus musculus GN=Prdx6 PE=1 SV=1                                    | 0,462 |
| P26883     | Peptidyl-prolyl cis-trans isomerase FKBP1A OS=Mus musculus GN=Fkbp1a PE=1 SV=2        | 0,461 |
| P84086     | Complexin-2 OS=Mus musculus GN=Cplx2 PE=1 SV=1                                        | 0,459 |
| O88569     | Heterogeneous nuclear ribonucleoproteins A2/B1 OS=Mus musculus GN=Hnrnpa2b1 PE=1 SV=2 | 0,457 |
| Q921M7     | Protein FAM49B OS=Mus musculus GN=Fam49b PE=2 SV=1                                    | 0,456 |
| P20029     | 78 kDa glucose-regulated protein OS=Mus musculus GN=Hspa5 PE=1 SV=3                   | 0,454 |
| Q9CZC8     | Secernin-1 OS=Mus musculus GN=Scrn1 PE=1 SV=1                                         | 0,452 |
| P99024     | Tubulin beta-5 chain OS=Mus musculus GN=Tubb5 PE=1 SV=1                               | 0,45  |
| P42669     | Transcriptional activator protein Pur-alpha OS=Mus musculus GN=Pura PE=1 SV=1         | 0,45  |
| P68510     | 14-3-3 protein eta OS=Mus musculus GN=Ywhah PE=1 SV=2                                 | 0,447 |
| B2RTK3     | Histone H2B OS=Mus musculus GN=Hist1h2bm PE=2 SV=1                                    | 0,445 |
| AOA0A0MQF6 | Glyceraldehyde-3-phosphate dehydrogenase OS=Mus musculus GN=Gapdh PE=1 SV=1           | 0,443 |
| Q99PU5     | Long-chain-fatty-acid--CoA ligase ACSBG1 OS=Mus musculus GN=Acsbg1 PE=1 SV=1          | 0,442 |
| O08539     | Myc box-dependent-interacting protein 1 OS=Mus musculus GN=Bin1 PE=1 SV=1             | 0,439 |

|            |                                                                                             |       |
|------------|---------------------------------------------------------------------------------------------|-------|
| P19157     | Glutathione S-transferase P 1 OS=Mus musculus GN=Gstp1 PE=1 SV=2                            | 0,438 |
| Q9CZ13     | Cytochrome b-c1 complex subunit 1, mitochondrial OS=Mus musculus GN=Uqcrc1 PE=1 SV=2        | 0,438 |
| Q9QYCO     | Alpha-adducin OS=Mus musculus GN=Add1 PE=1 SV=2                                             | 0,437 |
| A2AWN8     | YTH domain family 1, isoform CRA_a OS=Mus musculus GN=Ythdf1 PE=1 SV=1                      | 0,434 |
| Q9WTT4     | V-type proton ATPase subunit G 2 OS=Mus musculus GN=Atp6v1g2 PE=3 SV=1                      | 0,432 |
| Q61598     | Rab GDP dissociation inhibitor beta OS=Mus musculus GN=Gdi2 PE=1 SV=1                       | 0,432 |
| P50518     | V-type proton ATPase subunit E 1 OS=Mus musculus GN=Atp6v1e1 PE=1 SV=2                      | 0,428 |
| P12658     | Calbindin OS=Mus musculus GN=Calb1 PE=1 SV=2                                                | 0,427 |
| P14152     | Malate dehydrogenase, cytoplasmic OS=Mus musculus GN=Mdh1 PE=1 SV=3                         | 0,419 |
| B2RSH2     | Guanine nucleotide-binding protein G(i) subunit alpha-1 OS=Mus musculus GN=Gnai1 PE=1 SV=1  | 0,419 |
| Q922J6     | Tetraspanin-2 OS=Mus musculus GN=Tspan2 PE=1 SV=1                                           | 0,417 |
| P48722     | Heat shock 70 kDa protein 4L OS=Mus musculus GN=Hspa4l PE=1 SV=2                            | 0,417 |
| Q60631     | Growth factor receptor-bound protein 2 OS=Mus musculus GN=Grb2 PE=1 SV=1                    | 0,409 |
| A0A076FRG6 | KCC2a variant 1 OS=Mus musculus GN=Slc12a5 PE=2 SV=1                                        | 0,407 |
| Q80TL4     | PHD finger protein 24 OS=Mus musculus GN=Phf24 PE=1 SV=2                                    | 0,403 |
| Q7TQI3     | Ubiquitin thioesterase OTUB1 OS=Mus musculus GN=Otub1 PE=1 SV=2                             | 0,394 |
| P63038     | 60 kDa heat shock protein, mitochondrial OS=Mus musculus GN=Hspd1 PE=1 SV=1                 | 0,393 |
| P06837     | Neuromodulin OS=Mus musculus GN=Gap43 PE=1 SV=1                                             | 0,381 |
| P62774     | Myotrophin OS=Mus musculus GN=Mtpn PE=1 SV=2                                                | 0,379 |
| A0A0G2JFT8 | Protein RUFY3 OS=Mus musculus GN=Rufy3 PE=1 SV=1                                            | 0,372 |
| Q9CPW4     | Actin-related protein 2/3 complex subunit 5 OS=Mus musculus GN=Arpc5 PE=2 SV=3              | 0,371 |
| Q68FL4     | Putative adenosylhomocysteinase 3 OS=Mus musculus GN=Ahcyl2 PE=1 SV=1                       | 0,368 |
| Q6IRU5     | Clathrin light chain B OS=Mus musculus GN=Cltb PE=1 SV=1                                    | 0,366 |
| P31650     | Sodium- and chloride-dependent GABA transporter 3 OS=Mus musculus GN=Slc6a11 PE=1 SV=2      | 0,366 |
| P60761     | Neurogranin OS=Mus musculus GN=Nrgn PE=1 SV=1                                               | 0,364 |
| O08749     | Dihydrolipoyl dehydrogenase, mitochondrial OS=Mus musculus GN=Dld PE=1 SV=2                 | 0,362 |
| P99027     | 60S acidic ribosomal protein P2 OS=Mus musculus GN=Rplp2 PE=1 SV=3                          | 0,355 |
| P08228     | Superoxide dismutase [Cu-Zn] OS=Mus musculus GN=Sod1 PE=1 SV=2                              | 0,346 |
| Q9JKD3     | Secretory carrier-associated membrane protein 5 OS=Mus musculus GN=Scamp5 PE=1 SV=1         | 0,34  |
| P48036     | Annexin A5 OS=Mus musculus GN=Anxa5 PE=1 SV=1                                               | 0,339 |
| Q9CX86     | Heterogeneous nuclear ribonucleoprotein A0 OS=Mus musculus GN=Hnrnpa0 PE=1 SV=1             | 0,338 |
| Q63810     | Calcineurin subunit B type 1 OS=Mus musculus GN=Ppp3r1 PE=1 SV=3                            | 0,337 |
| P63040     | Complexin-1 OS=Mus musculus GN=Cplx1 PE=1 SV=1                                              | 0,335 |
| P32848     | Parvalbumin alpha OS=Mus musculus GN=Pvalb PE=1 SV=3                                        | 0,327 |
| Q4VWZ5     | Acyl-CoA-binding protein OS=Mus musculus GN=Dbi PE=1 SV=1                                   | 0,324 |
| F6VPT0     | Protein Ccdc163 (Fragment) OS=Mus musculus GN=Ccdc163 PE=4 SV=1                             | 0,323 |
| P02802     | Metallothionein-1 OS=Mus musculus GN=Mt1 PE=1 SV=1                                          | 0,322 |
| P62204     | Calmodulin OS=Mus musculus GN=Calm1 PE=1 SV=2                                               | 0,313 |
| D3YXH0     | Immunoglobulin superfamily member 5 OS=Mus musculus GN=Igsf5 PE=4 SV=1                      | 0,311 |
| Q9D3D9     | ATP synthase subunit delta, mitochondrial OS=Mus musculus GN=Atp5d PE=1 SV=1                | 0,297 |
| Q91XV3     | Brain acid soluble protein 1 OS=Mus musculus GN=Basp1 PE=1 SV=3                             | 0,284 |
| Q9CRB6     | Tubulin polymerization-promoting protein family member 3 OS=Mus musculus GN=Tppp3 PE=1 SV=1 | 0,274 |

|        |                                                                                           |       |
|--------|-------------------------------------------------------------------------------------------|-------|
| P26645 | Myristoylated alanine-rich C-kinase substrate OS=Mus musculus GN=Marcks PE=1 SV=2         | 0,273 |
| Q9WV69 | Dematin OS=Mus musculus GN=Dmtn PE=1 SV=1                                                 | 0,269 |
| Q9JKC6 | Cell cycle exit and neuronal differentiation protein 1 OS=Mus musculus GN=Cend1 PE=1 SV=1 | 0,269 |
| P43274 | Histone H1.4 OS=Mus musculus GN=Hist1h1e PE=1 SV=2                                        | 0,256 |
| B1AWD9 | Clathrin light chain A OS=Mus musculus GN=Clta PE=1 SV=1                                  | 0,255 |
| Q8CI43 | Myosin light chain 6B OS=Mus musculus GN=Myl6b PE=2 SV=1                                  | 0,252 |
| P61089 | Ubiquitin-conjugating enzyme E2 N OS=Mus musculus GN=Ube2n PE=1 SV=1                      | 0,249 |
| G5E8N5 | L-lactate dehydrogenase OS=Mus musculus GN=Ldha PE=1 SV=1                                 | 0,248 |
| Q6ZWX2 | Thymosin, beta 4, X chromosome OS=Mus musculus GN=Tmsb4x PE=2 SV=1                        | 0,239 |
| P13595 | Neural cell adhesion molecule 1 OS=Mus musculus GN=Ncam1 PE=1 SV=3                        | 0,224 |
| E9PYN1 | Cell adhesion molecule 1 OS=Mus musculus GN=Cadm1 PE=1 SV=1                               | 0,212 |
| P28663 | Beta-soluble NSF attachment protein OS=Mus musculus GN=Napb PE=1 SV=2                     | 0,21  |
| P20065 | Thymosin beta-4 OS=Mus musculus GN=Tmsb4x PE=1 SV=1                                       | 0,207 |
| P60904 | DnaJ homolog subfamily C member 5 OS=Mus musculus GN=Dnajc5 PE=1 SV=1                     | 0,204 |

**DATA FILE S1**  
**REGULATED PROTEINS TG: 24 vs. 3 months**

| Accession | Description                                                                                       | Abundance Ratio: (TG24) / (TG3) |
|-----------|---------------------------------------------------------------------------------------------------|---------------------------------|
| P43276    | Histone H1.5 OS=Mus musculus GN=Hist1h1b PE=1 SV=2                                                | 16,605                          |
| Q9Z331    | Keratin, type II cytoskeletal 6B OS=Mus musculus GN=Krt6b PE=1 SV=3                               | 11,79                           |
| Q55ZA3    | Histone cluster 1, H1c OS=Mus musculus GN=Hist1h1c PE=2 SV=1                                      | 10,817                          |
| P12023    | Amyloid beta A4 protein OS=Mus musculus GN=App PE=1 SV=3                                          | 10,645                          |
| Q3SYP5    | Keratin 16 OS=Mus musculus GN=Krt16 PE=2 SV=1                                                     | 8,456                           |
| Q8R1B4    | Eukaryotic translation initiation factor 3 subunit C OS=Mus musculus GN=Eif3c PE=1 SV=1           | 8,243                           |
| Q02105    | Complement C1q subcomponent subunit C OS=Mus musculus GN=C1qc PE=2 SV=2                           | 8,076                           |
| Q04690    | Neurofibromin OS=Mus musculus GN=Nf1 PE=1 SV=1                                                    | 7,567                           |
| Q3TXU4    | Apolipoprotein E, isoform CRA_h OS=Mus musculus GN=Apoe PE=2 SV=1                                 | 7,512                           |
| P14106    | Complement C1q subcomponent subunit B OS=Mus musculus GN=C1qb PE=1 SV=2                           | 6,261                           |
| P01592    | Immunoglobulin J chain OS=Mus musculus GN=Igj PE=2 SV=4                                           | 5,777                           |
| J3QMG3    | Voltage-dependent anion-selective channel protein 3 OS=Mus musculus GN=Vdac3 PE=1 SV=1            | 5,506                           |
| Q9WTL4    | Insulin receptor-related protein OS=Mus musculus GN=Insrr PE=1 SV=2                               | 5,505                           |
| P28651    | Carbonic anhydrase-related protein OS=Mus musculus GN=Ca8 PE=1 SV=5                               | 5,411                           |
| Q3U7E0    | Putative uncharacterized protein OS=Mus musculus GN=Atp6v1g1 PE=2 SV=1                            | 5,379                           |
| Q61782    | Type I epidermal keratin mRNA, 3'end (Fragment) OS=Mus musculus PE=2 SV=1                         | 5,352                           |
| Q9ESM3    | Hyaluronan and proteoglycan link protein 2 OS=Mus musculus GN=Hapln2 PE=1 SV=1                    | 5,11                            |
| Q9QWL7    | Keratin, type I cytoskeletal 17 OS=Mus musculus GN=Krt17 PE=1 SV=3                                | 4,988                           |
| Q8BGT8    | Phytanoyl-CoA hydroxylase-interacting protein-like OS=Mus musculus GN=Phyhipl PE=2 SV=1           | 4,932                           |
| P10637-3  | Isoform Tau-B of Microtubule-associated protein tau OS=Mus musculus GN=Mapt                       | 4,524                           |
| E9Q7Q3    | Tropomyosin alpha-3 chain OS=Mus musculus GN=Tpm3 PE=1 SV=1                                       | 4,331                           |
| A6H611    | Mitochondrial intermediate peptidase OS=Mus musculus GN=Mipep PE=1 SV=1                           | 4,243                           |
| P21460    | Cystatin-C OS=Mus musculus GN=Cst3 PE=1 SV=2                                                      | 4,101                           |
| Q61282    | Aggrecan core protein OS=Mus musculus GN=Acan PE=1 SV=2                                           | 4,049                           |
| Q9JM93    | ADP-ribosylation factor-like protein 6-interacting protein 4 OS=Mus musculus GN=Arl6ip4 PE=1 SV=1 | 4,046                           |
| Q9QUP5    | Hyaluronan and proteoglycan link protein 1 OS=Mus musculus GN=Hapln1 PE=1 SV=1                    | 3,997                           |
| E9PYH0    | Versican core protein OS=Mus musculus GN=Vcan PE=1 SV=1                                           | 3,976                           |
| F6YVP7    | Protein Gm10260 OS=Mus musculus GN=Gm10260 PE=3 SV=2                                              | 3,763                           |
| Q9D3D9    | ATP synthase subunit delta, mitochondrial OS=Mus musculus GN=Atp5d PE=1 SV=1                      | 3,747                           |
| P11983    | T-complex protein 1 subunit alpha OS=Mus musculus GN=Tcp1 PE=1 SV=3                               | 3,73                            |
| P10922    | Histone H1.0 OS=Mus musculus GN=H1f0 PE=2 SV=4                                                    | 3,51                            |
| P28663    | Beta-soluble NSF attachment protein OS=Mus musculus GN=Napb PE=1 SV=2                             | 3,483                           |
| P28184    | Metallothionein-3 OS=Mus musculus GN=Mt3 PE=1 SV=1                                                | 3,433                           |
| Q99MN9    | Propionyl-CoA carboxylase beta chain, mitochondrial OS=Mus musculus GN=Pccb PE=1 SV=2             | 3,239                           |
| E9Q035    | Protein Gm20425 OS=Mus musculus GN=Gm20425 PE=4 SV=1                                              | 3,214                           |
| Q8BMS1    | Trifunctional enzyme subunit alpha, mitochondrial OS=Mus musculus GN=Hadha PE=1 SV=1              | 3,211                           |
| P17156    | Heat shock-related 70 kDa protein 2 OS=Mus musculus GN=Hspa2 PE=1 SV=2                            | 3,206                           |
| Q564G0    | Guanylate kinase OS=Mus musculus GN=Guk1 PE=1 SV=1                                                | 3,184                           |
| P55066    | Neurocan core protein OS=Mus musculus GN=Ncan PE=2 SV=1                                           | 3,037                           |
| P19001    | Keratin, type I cytoskeletal 19 OS=Mus musculus GN=Krt19 PE=1 SV=1                                | 3,026                           |

|            |                                                                                            |       |
|------------|--------------------------------------------------------------------------------------------|-------|
| P00920     | Carbonic anhydrase 2 OS=Mus musculus GN=Ca2 PE=1 SV=4                                      | 3,003 |
| Q9QYCO     | Alpha-adducin OS=Mus musculus GN=Add1 PE=1 SV=2                                            | 2,926 |
| Q9DCDO     | 6-phosphogluconate dehydrogenase, decarboxylating OS=Mus musculus GN=Pgd PE=1 SV=3         | 2,894 |
| Q58EA6     | MCG10725, isoform CRA_a OS=Mus musculus GN=Rps25 PE=2 SV=1                                 | 2,884 |
| P26883     | Peptidyl-prolyl cis-trans isomerase FKBP1A OS=Mus musculus GN=Fkbp1a PE=1 SV=2             | 2,87  |
| P63040     | Complexin-1 OS=Mus musculus GN=Cplx1 PE=1 SV=1                                             | 2,867 |
| Q9CXS4     | Centromere protein V OS=Mus musculus GN=Cenpv PE=1 SV=2                                    | 2,808 |
| Q3UNV7     | Putative uncharacterized protein OS=Mus musculus GN=Mlf2 PE=2 SV=1                         | 2,778 |
| P70441     | Na(+)/H(+) exchange regulatory cofactor NHE-RF1 OS=Mus musculus GN=Slc9a3r1 PE=1 SV=3      | 2,718 |
| Q61781     | Keratin, type I cytoskeletal 14 OS=Mus musculus GN=Krt14 PE=1 SV=2                         | 2,655 |
| B9EIC7     | MCG3853 OS=Mus musculus GN=Phyhip PE=2 SV=1                                                | 2,637 |
| Q4FJX9     | Superoxide dismutase OS=Mus musculus GN=Sod2 PE=2 SV=1                                     | 2,609 |
| P26645     | Myristoylated alanine-rich C-kinase substrate OS=Mus musculus GN=Marcks PE=1 SV=2          | 2,609 |
| Q60829     | Protein phosphatase 1 regulatory subunit 1B OS=Mus musculus GN=Ppp1r1b PE=2 SV=2           | 2,584 |
| AOA075B6A0 | Ig mu chain C region (Fragment) OS=Mus musculus GN=Ighm PE=1 SV=2                          | 2,575 |
| AOA0G2JEG8 | Amphiphysin OS=Mus musculus GN=Amph PE=1 SV=1                                              | 2,566 |
| Q8BVI4     | Dihydropteridine reductase OS=Mus musculus GN=Qdpr PE=1 SV=2                               | 2,536 |
| A2CEK3     | Phosphoglucomutase-2 OS=Mus musculus GN=Pgm2 PE=1 SV=1                                     | 2,509 |
| AOA075B5P2 | Protein Igkc (Fragment) OS=Mus musculus GN=Igkc PE=1 SV=1                                  | 2,469 |
| B2RXY7     | Carbonyl reductase 1 OS=Mus musculus GN=Cbr1 PE=2 SV=1                                     | 2,462 |
| P61089     | Ubiquitin-conjugating enzyme E2 N OS=Mus musculus GN=Ube2n PE=1 SV=1                       | 2,452 |
| Q543Y7     | Putative uncharacterized protein OS=Mus musculus GN=Pacsin1 PE=2 SV=1                      | 2,44  |
| Q9CZU6     | Citrate synthase, mitochondrial OS=Mus musculus GN=Cs PE=1 SV=1                            | 2,434 |
| P62827     | GTP-binding nuclear protein Ran OS=Mus musculus GN=Ran PE=1 SV=3                           | 2,381 |
| Q61FX2     | Keratin, type I cytoskeletal 42 OS=Mus musculus GN=Krt42 PE=1 SV=1                         | 2,371 |
| Q9Z2T6     | Keratin, type II cuticular Hb5 OS=Mus musculus GN=Krt85 PE=2 SV=2                          | 2,37  |
| Q60692     | Proteasome subunit beta type-6 OS=Mus musculus GN=Psm6 PE=1 SV=3                           | 2,359 |
| Q9CPW4     | Actin-related protein 2/3 complex subunit 5 OS=Mus musculus GN=Arpc5 PE=2 SV=3             | 2,339 |
| Q9CZY3     | Ubiquitin-conjugating enzyme E2 variant 1 OS=Mus musculus GN=Ube2v1 PE=1 SV=1              | 2,33  |
| P12382     | ATP-dependent 6-phosphofructokinase, liver type OS=Mus musculus GN=Pfkl PE=1 SV=4          | 2,313 |
| Q9R062     | Glycogenin-1 OS=Mus musculus GN=Gyg1 PE=1 SV=3                                             | 2,31  |
| E9PYN1     | Cell adhesion molecule 1 OS=Mus musculus GN=Cadm1 PE=1 SV=1                                | 2,307 |
| Q9JKD3     | Secretory carrier-associated membrane protein 5 OS=Mus musculus GN=Scamp5 PE=1 SV=1        | 2,286 |
| Q7M6W1     | Reticulon OS=Mus musculus GN=Rtn1 PE=1 SV=1                                                | 2,246 |
| P43274     | Histone H1.4 OS=Mus musculus GN=Hist1h1e PE=1 SV=2                                         | 2,24  |
| Q9Z204     | Heterogeneous nuclear ribonucleoproteins C1/C2 OS=Mus musculus GN=Hnrnpc PE=1 SV=1         | 2,235 |
| P12787     | Cytochrome c oxidase subunit 5A, mitochondrial OS=Mus musculus GN=Cox5a PE=1 SV=2          | 2,222 |
| P62774     | Myotrophin OS=Mus musculus GN=Mtpn PE=1 SV=2                                               | 2,201 |
| P05201     | Aspartate aminotransferase, cytoplasmic OS=Mus musculus GN=Got1 PE=1 SV=3                  | 2,188 |
| Q9JIS5     | Synaptic vesicle glycoprotein 2A OS=Mus musculus GN=Sv2a PE=1 SV=1                         | 2,175 |
| Q8R0Y6     | Cytosolic 10-formyltetrahydrofolate dehydrogenase OS=Mus musculus GN=Aldh1l1 PE=1 SV=1     | 2,174 |
| P13707     | Glycerol-3-phosphate dehydrogenase [NAD(+)], cytoplasmic OS=Mus musculus GN=Gpd1 PE=1 SV=3 | 2,173 |
| AOA087WQN2 | Prothymosin alpha (Fragment) OS=Mus musculus GN=Ptma PE=1 SV=1                             | 2,163 |
| Q8BVE3     | V-type proton ATPase subunit H OS=Mus musculus GN=Atp6v1h PE=1 SV=1                        | 2,138 |

|            |                                                                                                                                                     |       |
|------------|-----------------------------------------------------------------------------------------------------------------------------------------------------|-------|
| Q91VE0     | Long-chain fatty acid transport protein 4 OS=Mus musculus GN=Slc27a4 PE=1 SV=1                                                                      | 2,134 |
| O35955     | Proteasome subunit beta type-10 OS=Mus musculus GN=Psmb10 PE=1 SV=1                                                                                 | 2,112 |
| A0A097PUG4 | Anti-lox-1 15C4 light chain OS=Mus musculus PE=2 SV=1                                                                                               | 2,103 |
| P19783     | Cytochrome c oxidase subunit 4 isoform 1, mitochondrial OS=Mus musculus GN=Cox4i1 PE=1 SV=2                                                         | 2,101 |
| Q9QZQ8     | Core histone macro-H2A.1 OS=Mus musculus GN=H2afy PE=1 SV=3                                                                                         | 2,087 |
| A0A075B5P3 | Protein Ighg2b (Fragment) OS=Mus musculus GN=Ighg2b PE=1 SV=1                                                                                       | 2,086 |
| Q78ZJ8     | MCG22989, isoform CRA_b OS=Mus musculus GN=Rab11b PE=2 SV=1                                                                                         | 2,07  |
| Q9Z0E0     | Neurochondrin OS=Mus musculus GN=Ncdn PE=1 SV=1                                                                                                     | 2,07  |
| B1AQW2     | Microtubule-associated protein OS=Mus musculus GN=Mapt PE=1 SV=1                                                                                    | 2,064 |
| O55091     | Protein IMPACT OS=Mus musculus GN=Impact PE=1 SV=2                                                                                                  | 2,043 |
| P08228     | Superoxide dismutase [Cu-Zn] OS=Mus musculus GN=Sod1 PE=1 SV=2                                                                                      | 2,017 |
| P62305     | Small nuclear ribonucleoprotein E OS=Mus musculus GN=Snrpe PE=1 SV=1                                                                                | 2,004 |
| P61979     | Heterogeneous nuclear ribonucleoprotein K OS=Mus musculus GN=Hnrnpk PE=1 SV=1                                                                       | 2,001 |
| Q8BWF0     | Succinate-semialdehyde dehydrogenase, mitochondrial OS=Mus musculus GN=Aldh5a1 PE=1 SV=1                                                            | 1,992 |
| Q9QXS1     | Plectin OS=Mus musculus GN=Plec PE=1 SV=3                                                                                                           | 1,992 |
| Q3TQ70     | Beta1 subunit of GTP-binding protein OS=Mus musculus GN=Gnb1 PE=2 SV=1                                                                              | 1,987 |
| Q8BTI8     | Serine/arginine repetitive matrix protein 2 OS=Mus musculus GN=Srrm2 PE=1 SV=3                                                                      | 1,98  |
| P56399     | Ubiquitin carboxyl-terminal hydrolase 5 OS=Mus musculus GN=Usp5 PE=1 SV=1                                                                           | 1,973 |
| E9Q557     | Desmoplakin OS=Mus musculus GN=Dsp PE=1 SV=1                                                                                                        | 1,968 |
| P68040     | Receptor of activated protein C kinase 1 OS=Mus musculus GN=Rack1 PE=1 SV=3                                                                         | 1,968 |
| Q9WUB3     | Glycogen phosphorylase, muscle form OS=Mus musculus GN=Pygm PE=1 SV=3                                                                               | 1,957 |
| Q9QYX7     | Protein piccolo OS=Mus musculus GN=Pclo PE=1 SV=4                                                                                                   | 1,957 |
| D3Z722     | 40S ribosomal protein S19 OS=Mus musculus GN=Rps19 PE=1 SV=1                                                                                        | 1,947 |
| Q9Z1G4     | V-type proton ATPase 116 kDa subunit a isoform 1 OS=Mus musculus GN=Atp6v0a1 PE=1 SV=3                                                              | 1,947 |
| Q9Z0H4     | CUGBP Elav-like family member 2 OS=Mus musculus GN=Celf2 PE=1 SV=1                                                                                  | 1,944 |
| P62715     | Serine/threonine-protein phosphatase 2A catalytic subunit beta isoform OS=Mus musculus GN=Ppp2cb PE=1 SV=1                                          | 1,938 |
| Q3ULD5     | Methylcrotonoyl-CoA carboxylase beta chain, mitochondrial OS=Mus musculus GN=Mccc2 PE=1 SV=1                                                        | 1,928 |
| P46460     | Vesicle-fusing ATPase OS=Mus musculus GN=Nsf PE=1 SV=2                                                                                              | 1,902 |
| Q9QXV0     | ProSAAS OS=Mus musculus GN=Pcsk1n PE=1 SV=2                                                                                                         | 1,901 |
| Q61838     | Alpha-2-macroglobulin OS=Mus musculus GN=A2m PE=1 SV=3                                                                                              | 1,893 |
| E9PUA3     | IQ motif and SEC7 domain-containing protein 1 OS=Mus musculus GN=Iqsec1 PE=1 SV=1                                                                   | 1,891 |
| Q3UYK6     | Amino acid transporter OS=Mus musculus GN=Slc1a2 PE=2 SV=1                                                                                          | 1,89  |
| P97300     | Neuroplastin OS=Mus musculus GN=Nptn PE=1 SV=3                                                                                                      | 1,882 |
| Q6GT24     | Peroxisome oxidoredoxin 6 OS=Mus musculus GN=Prdx6 PE=1 SV=1                                                                                        | 1,877 |
| Q9D0M5     | Dynein light chain 2, cytoplasmic OS=Mus musculus GN=Dynll2 PE=1 SV=1                                                                               | 1,875 |
| Q549A5     | Clusterin OS=Mus musculus GN=Clu PE=2 SV=1                                                                                                          | 1,869 |
| P62814     | V-type proton ATPase subunit B, brain isoform OS=Mus musculus GN=Atp6v1b2 PE=1 SV=1                                                                 | 1,852 |
| Q4FJX4     | Csrp1 protein OS=Mus musculus GN=Csrp1 PE=2 SV=1                                                                                                    | 1,851 |
| Q8R001     | Microtubule-associated protein RP/EB family member 2 OS=Mus musculus GN=Mapre2 PE=1 SV=1                                                            | 1,846 |
| Q3UY21     | Myelin-oligodendrocyte glycoprotein OS=Mus musculus GN=Mog PE=1 SV=1                                                                                | 1,821 |
| P63276     | 40S ribosomal protein S17 OS=Mus musculus GN=Rps17 PE=1 SV=2                                                                                        | 1,818 |
| Q9D2G2     | Dihydropyridyllysine-residue succinyltransferase component of 2-oxoglutarate dehydrogenase complex, mitochondrial OS=Mus musculus GN=Dlst PE=1 SV=1 | 1,81  |
| Q9Z1G3     | V-type proton ATPase subunit C 1 OS=Mus musculus GN=Atp6v1c1 PE=1 SV=4                                                                              | 1,805 |
| Q3TVK3     | Aspartyl aminopeptidase OS=Mus musculus GN=Dnpep PE=1 SV=1                                                                                          | 1,8   |



|          |                                                                                                                                             |       |
|----------|---------------------------------------------------------------------------------------------------------------------------------------------|-------|
| P48036   | Annexin A5 OS=Mus musculus GN=Anxa5 PE=1 SV=1                                                                                               | 1,795 |
| P62858   | 40S ribosomal protein S28 OS=Mus musculus GN=Rps28 PE=1 SV=1                                                                                | 1,794 |
| Q9Z2D6-2 | Isoform B of Methyl-CpG-binding protein 2 OS=Mus musculus GN=Mecp2                                                                          | 1,784 |
| F6VPT0   | Protein Ccdc163 (Fragment) OS=Mus musculus GN=Ccdc163 PE=4 SV=1                                                                             | 1,783 |
| E9PZF0   | Nucleoside diphosphate kinase OS=Mus musculus GN=Gm20390 PE=3 SV=1                                                                          | 1,782 |
| E9Q455   | Tropomyosin alpha-1 chain OS=Mus musculus GN=Tpm1 PE=1 SV=1                                                                                 | 1,78  |
| Q8BG05   | Heterogeneous nuclear ribonucleoprotein A3 OS=Mus musculus GN=Hnrnpa3 PE=1 SV=1                                                             | 1,78  |
| Q7TSJ2   | Microtubule-associated protein 6 OS=Mus musculus GN=Map6 PE=1 SV=2                                                                          | 1,776 |
| P11881   | Inositol 1,4,5-trisphosphate receptor type 1 OS=Mus musculus GN=Itpr1 PE=1 SV=2                                                             | 1,774 |
| P05202   | Aspartate aminotransferase, mitochondrial OS=Mus musculus GN=Got2 PE=1 SV=1                                                                 | 1,772 |
| Q9D0M3   | Cytochrome c1, heme protein, mitochondrial OS=Mus musculus GN=Cyc1 PE=1 SV=1                                                                | 1,764 |
| Q8C605   | ATP-dependent 6-phosphofructokinase OS=Mus musculus GN=Pfkm PE=1 SV=1                                                                       | 1,751 |
| Q99PT1   | Rho GDP-dissociation inhibitor 1 OS=Mus musculus GN=Arhgdia PE=1 SV=3                                                                       | 1,738 |
| P47857   | ATP-dependent 6-phosphofructokinase, muscle type OS=Mus musculus GN=Pfkm PE=1 SV=3                                                          | 1,736 |
| Q9JLZ3   | Methylglutaconyl-CoA hydratase, mitochondrial OS=Mus musculus GN=Auh PE=1 SV=1                                                              | 1,714 |
| Q8BYI9   | Tenascin-R OS=Mus musculus GN=Tnr PE=1 SV=2                                                                                                 | 1,703 |
| Q9Z2I9   | Succinate--CoA ligase [ADP-forming] subunit beta, mitochondrial OS=Mus musculus GN=Sucla2 PE=1 SV=2                                         | 1,691 |
| Q6ZWX2   | Thymosin, beta 4, X chromosome OS=Mus musculus GN=Tmsb4x PE=2 SV=1                                                                          | 1,688 |
| O55143   | Sarcoplasmic/endoplasmic reticulum calcium ATPase 2 OS=Mus musculus GN=Atp2a2 PE=1 SV=2                                                     | 1,68  |
| P57780   | Alpha-actinin-4 OS=Mus musculus GN=Actn4 PE=1 SV=1                                                                                          | 1,674 |
| Q0VF55   | Calcium-transporting ATPase OS=Mus musculus GN=Atp2b3 PE=1 SV=1                                                                             | 1,674 |
| Q9CPU0   | Lactoylglutathione lyase OS=Mus musculus GN=Glo1 PE=1 SV=3                                                                                  | 1,664 |
| B2RTL5   | Aldehyde dehydrogenase family 1, subfamily A7 OS=Mus musculus GN=Aldh1a7 PE=2 SV=1                                                          | 1,663 |
| Q3UMU9   | Hepatoma-derived growth factor-related protein 2 OS=Mus musculus GN=Hdgfrp2 PE=1 SV=1                                                       | 1,66  |
| Q3V0Q1   | Dynein heavy chain 12, axonemal OS=Mus musculus GN=Dnah12 PE=1 SV=2                                                                         | 1,655 |
| Q9DBG3   | AP-2 complex subunit beta OS=Mus musculus GN=Ap2b1 PE=1 SV=1                                                                                | 1,651 |
| P47757   | F-actin-capping protein subunit beta OS=Mus musculus GN=Capzb PE=1 SV=3                                                                     | 1,641 |
| Q8R016   | Bleomycin hydrolase OS=Mus musculus GN=Blmh PE=1 SV=1                                                                                       | 1,639 |
| G5E924   | Heterogeneous nuclear ribonucleoprotein L (Fragment) OS=Mus musculus GN=Hnrnpl PE=1 SV=1                                                    | 1,636 |
| P14211   | Calreticulin OS=Mus musculus GN=Calr PE=1 SV=1                                                                                              | 1,616 |
| P80316   | T-complex protein 1 subunit epsilon OS=Mus musculus GN=Cct5 PE=1 SV=1                                                                       | 1,613 |
| P31324   | cAMP-dependent protein kinase type II-beta regulatory subunit OS=Mus musculus GN=Prkar2b PE=1 SV=3                                          | 1,608 |
| H3BKH6   | S-formylglutathione hydrolase OS=Mus musculus GN=Esd PE=1 SV=1                                                                              | 1,605 |
| P61922   | 4-aminobutyrate aminotransferase, mitochondrial OS=Mus musculus GN=Abat PE=1 SV=1                                                           | 1,589 |
| Q99KI0   | Aconitate hydratase, mitochondrial OS=Mus musculus GN=Aco2 PE=1 SV=1                                                                        | 1,588 |
| Q99M71   | Mammalian ependymin-related protein 1 OS=Mus musculus GN=Epdr1 PE=2 SV=1                                                                    | 1,587 |
| Q61598   | Rab GDP dissociation inhibitor beta OS=Mus musculus GN=Gdi2 PE=1 SV=1                                                                       | 1,586 |
| Q542X7   | Chaperonin subunit 2 (Beta), isoform CRA_a OS=Mus musculus GN=Cct2 PE=2 SV=1                                                                | 1,584 |
| P70168   | Importin subunit beta-1 OS=Mus musculus GN=Kpnb1 PE=1 SV=2                                                                                  | 1,574 |
| Q8K2C9   | Very-long-chain (3R)-3-hydroxyacyl-CoA dehydratase 3 OS=Mus musculus GN=Hacd3 PE=1 SV=2                                                     | 1,574 |
| Q8BMF4   | Dihydropolypyllysine-residue acetyltransferase component of pyruvate dehydrogenase complex, mitochondrial OS=Mus musculus GN=Dlat PE=1 SV=2 | 1,574 |
| P48771   | Cytochrome c oxidase subunit 7A2, mitochondrial OS=Mus musculus GN=Cox7a2 PE=1 SV=2                                                         | 1,573 |
| E0CYV0   | Protein-L-isoaspartate O-methyltransferase OS=Mus musculus GN=Pcmt1 PE=1 SV=1                                                               | 1,568 |
| P08249   | Malate dehydrogenase, mitochondrial OS=Mus musculus GN=Mdh2 PE=1 SV=3                                                                       | 1,566 |

|        |                                                                                                            |       |
|--------|------------------------------------------------------------------------------------------------------------|-------|
| Q3TGU7 | Proliferation-associated 2G4 OS=Mus musculus GN=Pa2g4 PE=2 SV=1                                            | 1,565 |
| P63011 | Ras-related protein Rab-3A OS=Mus musculus GN=Rab3a PE=1 SV=1                                              | 1,565 |
| P40336 | Vacuolar protein sorting-associated protein 26A OS=Mus musculus GN=Vps26a PE=1 SV=1                        | 1,562 |
| Q99PU5 | Long-chain-fatty-acid--CoA ligase ACSBG1 OS=Mus musculus GN=Acsbg1 PE=1 SV=1                               | 1,561 |
| Q9D8B3 | Charged multivesicular body protein 4b OS=Mus musculus GN=Chmp4b PE=1 SV=2                                 | 1,557 |
| A2AWN8 | YTH domain family 1, isoform CRA_a OS=Mus musculus GN=Ythdf1 PE=1 SV=1                                     | 1,554 |
| Q544E3 | Phosphatidylinositol-4-phosphate 5-kinase, type II, alpha OS=Mus musculus GN=Pip4k2a PE=2 SV=1             | 1,552 |
| Q61361 | Brevican core protein OS=Mus musculus GN=Bcan PE=1 SV=2                                                    | 1,544 |
| P60335 | Poly(rC)-binding protein 1 OS=Mus musculus GN=Pcbp1 PE=1 SV=1                                              | 1,542 |
| E9Q8N8 | Anion exchange protein OS=Mus musculus GN=Slc4a4 PE=1 SV=1                                                 | 1,539 |
| Q3U1N0 | Coronin OS=Mus musculus GN=Coro1a PE=2 SV=1                                                                | 1,538 |
| Q5BLK0 | MCG18564, isoform CRA_a OS=Mus musculus GN=Rpl12 PE=2 SV=1                                                 | 1,528 |
| Q61990 | Poly(rC)-binding protein 2 OS=Mus musculus GN=Pcbp2 PE=1 SV=1                                              | 1,52  |
| P20357 | Microtubule-associated protein 2 OS=Mus musculus GN=Map2 PE=1 SV=2                                         | 1,508 |
| Q3U4U6 | T-complex protein 1 subunit gamma OS=Mus musculus GN=Cct3 PE=2 SV=1                                        | 1,508 |
| P50396 | Rab GDP dissociation inhibitor alpha OS=Mus musculus GN=Gdi1 PE=1 SV=3                                     | 1,501 |
| P14148 | 60S ribosomal protein L7 OS=Mus musculus GN=Rpl7 PE=1 SV=2                                                 | 1,5   |
| Q01853 | Transitional endoplasmic reticulum ATPase OS=Mus musculus GN=Vcp PE=1 SV=4                                 | 1,493 |
| Q91ZU6 | Dystonin OS=Mus musculus GN=Dst PE=1 SV=2                                                                  | 1,493 |
| P05063 | Fructose-bisphosphate aldolase C OS=Mus musculus GN=Aldoc PE=1 SV=4                                        | 1,492 |
| Q68FL4 | Putative adenosylhomocysteinase 3 OS=Mus musculus GN=Ahcy12 PE=1 SV=1                                      | 1,485 |
| P35235 | Tyrosine-protein phosphatase non-receptor type 11 OS=Mus musculus GN=Ptpn11 PE=1 SV=2                      | 1,484 |
| Q61171 | Peroxiredoxin-2 OS=Mus musculus GN=Prdx2 PE=1 SV=3                                                         | 1,483 |
| P51150 | Ras-related protein Rab-7a OS=Mus musculus GN=Rab7a PE=1 SV=2                                              | 1,473 |
| Q80YX1 | Tenascin OS=Mus musculus GN=Tnc PE=1 SV=1                                                                  | 1,473 |
| Q2PFD7 | PH and SEC7 domain-containing protein 3 OS=Mus musculus GN=Psd3 PE=1 SV=2                                  | 1,473 |
| Q91ZZ3 | Beta-synuclein OS=Mus musculus GN=Sncb PE=1 SV=1                                                           | 1,469 |
| Q7TQD2 | Tubulin polymerization-promoting protein OS=Mus musculus GN=Tppp PE=1 SV=1                                 | 1,468 |
| Q9JKC6 | Cell cycle exit and neuronal differentiation protein 1 OS=Mus musculus GN=Cend1 PE=1 SV=1                  | 1,468 |
| B2RRX2 | Serine/threonine-protein phosphatase OS=Mus musculus GN=Ppp3ca PE=2 SV=1                                   | 1,464 |
| Q3UAD6 | Heat shock protein 90kDa beta (Grp94), member 1 OS=Mus musculus GN=Hsp90b1 PE=2 SV=1                       | 1,462 |
| Q5M9J8 | MCG13936 OS=Mus musculus GN=Rpl28 PE=2 SV=1                                                                | 1,46  |
| Q52KC1 | Eukaryotic translation initiation factor 4A2 OS=Mus musculus GN=Eif4a2 PE=2 SV=1                           | 1,458 |
| P60761 | Neurogranin OS=Mus musculus GN=Nrgn PE=1 SV=1                                                              | 1,457 |
| P20152 | Vimentin OS=Mus musculus GN=Vim PE=1 SV=3                                                                  | 1,454 |
| Q5DQJ3 | Capping protein (Actin filament) muscle Z-line, alpha 2, isoform CRA_c OS=Mus musculus GN=Capza2 PE=2 SV=1 | 1,45  |
| P52760 | Ribonuclease UK114 OS=Mus musculus GN=Hrsp12 PE=1 SV=3                                                     | 1,449 |
| P63085 | Mitogen-activated protein kinase 1 OS=Mus musculus GN=Mapk1 PE=1 SV=3                                      | 1,448 |
| F8WHB1 | Calcium-transporting ATPase OS=Mus musculus GN=Atp2b2 PE=1 SV=1                                            | 1,441 |
| P27661 | Histone H2AX OS=Mus musculus GN=H2afx PE=1 SV=2                                                            | 1,438 |
| Q9DAK9 | 14 kDa phosphohistidine phosphatase OS=Mus musculus GN=Phpt1 PE=1 SV=1                                     | 1,437 |
| P60710 | Actin, cytoplasmic 1 OS=Mus musculus GN=Actb PE=1 SV=1                                                     | 1,43  |
| P70349 | Histidine triad nucleotide-binding protein 1 OS=Mus musculus GN=Hint1 PE=1 SV=3                            | 1,429 |
| Q9CPX4 | Ferritin OS=Mus musculus GN=Ftl1 PE=1 SV=1                                                                 | 1,423 |

|            |                                                                                                          |       |
|------------|----------------------------------------------------------------------------------------------------------|-------|
| P31650     | Sodium- and chloride-dependent GABA transporter 3 OS=Mus musculus GN=Slc6a11 PE=1 SV=2                   | 1,42  |
| O08749     | Dihydrolipoyl dehydrogenase, mitochondrial OS=Mus musculus GN=Dld PE=1 SV=2                              | 1,419 |
| Q80TL4     | PHD finger protein 24 OS=Mus musculus GN=Phf24 PE=1 SV=2                                                 | 1,417 |
| P61264     | Syntaxin-1B OS=Mus musculus GN=Stx1b PE=1 SV=1                                                           | 1,414 |
| B9EHNO     | Ubiquitin-activating enzyme E1, Chr X OS=Mus musculus GN=Uba1 PE=2 SV=1                                  | 1,398 |
| P15105     | Glutamine synthetase OS=Mus musculus GN=Glul PE=1 SV=6                                                   | 1,392 |
| Q9R1P0     | Proteasome subunit alpha type-4 OS=Mus musculus GN=Psm4 PE=1 SV=1                                        | 1,392 |
| Q8VCE0     | Sodium/potassium-transporting ATPase subunit alpha OS=Mus musculus GN=Atp1a3 PE=1 SV=1                   | 1,39  |
| Q8CI94     | Glycogen phosphorylase, brain form OS=Mus musculus GN=Pygb PE=1 SV=3                                     | 1,385 |
| O88342     | WD repeat-containing protein 1 OS=Mus musculus GN=Wdr1 PE=1 SV=3                                         | 1,383 |
| P68369     | Tubulin alpha-1A chain OS=Mus musculus GN=Tuba1a PE=1 SV=1                                               | 1,378 |
| Q8VDN2     | Sodium/potassium-transporting ATPase subunit alpha-1 OS=Mus musculus GN=Atp1a1 PE=1 SV=1                 | 1,377 |
| A2ARP8     | Microtubule-associated protein 1A OS=Mus musculus GN=Map1a PE=1 SV=1                                     | 1,372 |
| Q8VEK3     | Heterogeneous nuclear ribonucleoprotein U OS=Mus musculus GN=Hnrnpu PE=1 SV=1                            | 1,37  |
| Q91ZX7     | Prolow-density lipoprotein receptor-related protein 1 OS=Mus musculus GN=Lrp1 PE=1 SV=1                  | 1,368 |
| P58252     | Elongation factor 2 OS=Mus musculus GN=Eef2 PE=1 SV=2                                                    | 1,364 |
| Q9CZ13     | Cytochrome b-c1 complex subunit 1, mitochondrial OS=Mus musculus GN=Uqcrc1 PE=1 SV=2                     | 1,363 |
| AOA0A0MQA5 | Tubulin alpha chain (Fragment) OS=Mus musculus GN=Tuba4a PE=1 SV=1                                       | 1,353 |
| P84078     | ADP-ribosylation factor 1 OS=Mus musculus GN=Arf1 PE=1 SV=2                                              | 1,352 |
| P08752     | Guanine nucleotide-binding protein G(i) subunit alpha-2 OS=Mus musculus GN=Gnai2 PE=1 SV=5               | 1,35  |
| Q9D051     | Pyruvate dehydrogenase E1 component subunit beta, mitochondrial OS=Mus musculus GN=Pdhb PE=1 SV=1        | 1,345 |
| Q9WTT4     | V-type proton ATPase subunit G 2 OS=Mus musculus GN=Atp6v1g2 PE=3 SV=1                                   | 1,344 |
| G5E902     | MCG10343, isoform CRA_b OS=Mus musculus GN=Slc25a3 PE=1 SV=1                                             | 1,338 |
| P62317     | Small nuclear ribonucleoprotein Sm D2 OS=Mus musculus GN=Snrpd2 PE=3 SV=1                                | 1,331 |
| AOA0G2JFT8 | Protein RUFY3 OS=Mus musculus GN=Rufy3 PE=1 SV=1                                                         | 1,328 |
| F6RSK3     | Protein Gm17430 OS=Mus musculus GN=Gm17430 PE=4 SV=1                                                     | 1,325 |
| P55088     | Aquaporin-4 OS=Mus musculus GN=Aqp4 PE=1 SV=2                                                            | 1,323 |
| P11031     | Activated RNA polymerase II transcriptional coactivator p15 OS=Mus musculus GN=Sub1 PE=1 SV=3            | 1,321 |
| Q8C522     | Endonuclease domain-containing 1 protein OS=Mus musculus GN=Endod1 PE=1 SV=2                             | 1,321 |
| Q8K0T0     | Reticulon-1 OS=Mus musculus GN=Rtn1 PE=1 SV=1                                                            | 1,308 |
| A8IP69     | 14-3-3 protein gamma subtype OS=Mus musculus GN=Ywhag PE=2 SV=1                                          | 1,307 |
| P63318     | Protein kinase C gamma type OS=Mus musculus GN=Prkcg PE=1 SV=1                                           | 1,304 |
| Q60668     | Heterogeneous nuclear ribonucleoprotein D0 OS=Mus musculus GN=Hnrnpd PE=1 SV=2                           | 1,303 |
| Q9R1P4     | Proteasome subunit alpha type-1 OS=Mus musculus GN=Psm1 PE=1 SV=1                                        | 1,301 |
| Q546G4     | Albumin 1 OS=Mus musculus GN=Alb PE=2 SV=1                                                               | 0,775 |
| P47915     | 60S ribosomal protein L29 OS=Mus musculus GN=Rpl29 PE=2 SV=2                                             | 0,76  |
| Q9CU62     | Structural maintenance of chromosomes protein 1A OS=Mus musculus GN=Smc1a PE=1 SV=4                      | 0,757 |
| P62855     | 40S ribosomal protein S26 OS=Mus musculus GN=Rps26 PE=1 SV=3                                             | 0,752 |
| Q3TT94     | Serine/threonine-protein phosphatase 2A 55 kDa regulatory subunit B OS=Mus musculus GN=Ppp2r2a PE=2 SV=1 | 0,751 |
| P01831     | Thy-1 membrane glycoprotein OS=Mus musculus GN=Thy1 PE=1 SV=1                                            | 0,75  |
| P83882     | 60S ribosomal protein L36a OS=Mus musculus GN=Rpl36a PE=1 SV=2                                           | 0,744 |
| P62996     | Transformer-2 protein homolog beta OS=Mus musculus GN=Tra2b PE=1 SV=1                                    | 0,744 |
| Q91VB8     | Alpha globin 1 OS=Mus musculus GN=haemaglobin alpha 2 PE=1 SV=1                                          | 0,733 |
| D3Z4B2     | Gamma-soluble NSF attachment protein (Fragment) OS=Mus musculus GN=Napg PE=1 SV=1                        | 0,726 |

|        |                                                                                                                             |       |
|--------|-----------------------------------------------------------------------------------------------------------------------------|-------|
| O08539 | Myc box-dependent-interacting protein 1 OS=Mus musculus GN=Bin1 PE=1 SV=1                                                   | 0,711 |
| Q99PVO | Pre-mRNA-processing-splicing factor 8 OS=Mus musculus GN=Prpf8 PE=1 SV=2                                                    | 0,71  |
| P18872 | Guanine nucleotide-binding protein G(o) subunit alpha OS=Mus musculus GN=Gnao1 PE=1 SV=3                                    | 0,709 |
| DOVYV6 | Erythrocyte protein band 4.1-like 3 isoform B OS=Mus musculus GN=Epb4.1l3 PE=2 SV=1                                         | 0,708 |
| Q9WUM5 | Succinyl-CoA ligase [ADP/GDP-forming] subunit alpha, mitochondrial OS=Mus musculus GN=Suclg1 PE=1 SV=4                      | 0,705 |
| Q3TLP8 | RAS-related C3 botulinum substrate 1, isoform CRA_a OS=Mus musculus GN=Rac1 PE=1 SV=1                                       | 0,693 |
| P02802 | Metallothionein-1 OS=Mus musculus GN=Mt1 PE=1 SV=1                                                                          | 0,689 |
| P63038 | 60 kDa heat shock protein, mitochondrial OS=Mus musculus GN=Hspd1 PE=1 SV=1                                                 | 0,688 |
| P17742 | Peptidyl-prolyl cis-trans isomerase A OS=Mus musculus GN=Ppia PE=1 SV=2                                                     | 0,681 |
| P12970 | 60S ribosomal protein L7a OS=Mus musculus GN=Rpl7a PE=1 SV=2                                                                | 0,68  |
| P62204 | Calmodulin OS=Mus musculus GN=Calm1 PE=1 SV=2                                                                               | 0,679 |
| B1AQZ0 | Septin-8 OS=Mus musculus GN=Sept8 PE=1 SV=1                                                                                 | 0,678 |
| P68510 | 14-3-3 protein eta OS=Mus musculus GN=Ywhah PE=1 SV=2                                                                       | 0,677 |
| Q9CVB6 | Actin-related protein 2/3 complex subunit 2 OS=Mus musculus GN=Arcp2 PE=1 SV=3                                              | 0,665 |
| P08551 | Neurofilament light polypeptide OS=Mus musculus GN=Nefl PE=1 SV=5                                                           | 0,66  |
| P99024 | Tubulin beta-5 chain OS=Mus musculus GN=Tubb5 PE=1 SV=1                                                                     | 0,659 |
| O09167 | 60S ribosomal protein L21 OS=Mus musculus GN=Rpl21 PE=1 SV=3                                                                | 0,659 |
| Q6IRU5 | Clathrin light chain B OS=Mus musculus GN=Cltb PE=1 SV=1                                                                    | 0,657 |
| E9Q0J5 | Kinesin-like protein KIF21A OS=Mus musculus GN=Kif21a PE=1 SV=2                                                             | 0,657 |
| P20065 | Thymosin beta-4 OS=Mus musculus GN=Tmsb4x PE=1 SV=1                                                                         | 0,656 |
| Q548L4 | Glutamate decarboxylase OS=Mus musculus GN=Gad2 PE=2 SV=1                                                                   | 0,655 |
| F8WGL3 | Cofilin-1 OS=Mus musculus GN=Cfl1 PE=1 SV=1                                                                                 | 0,651 |
| Q8BKZ9 | Pyruvate dehydrogenase protein X component, mitochondrial OS=Mus musculus GN=Pdhx PE=1 SV=1                                 | 0,643 |
| Q8C2Q7 | Heterogeneous nuclear ribonucleoprotein H OS=Mus musculus GN=Hnrnp1 PE=1 SV=1                                               | 0,627 |
| Q5M9M5 | MCG10806 OS=Mus musculus GN=Rpl23a PE=2 SV=1                                                                                | 0,624 |
| P99028 | Cytochrome b-c1 complex subunit 6, mitochondrial OS=Mus musculus GN=Uqcrrh PE=1 SV=2                                        | 0,622 |
| P99027 | 60S acidic ribosomal protein P2 OS=Mus musculus GN=Rplp2 PE=1 SV=3                                                          | 0,62  |
| P63163 | Small nuclear ribonucleoprotein-associated protein N OS=Mus musculus GN=Snrpn PE=2 SV=1                                     | 0,612 |
| Q9CZC8 | Secernin-1 OS=Mus musculus GN=Scrn1 PE=1 SV=1                                                                               | 0,61  |
| P63017 | Heat shock cognate 71 kDa protein OS=Mus musculus GN=Hspa8 PE=1 SV=1                                                        | 0,61  |
| Q921M7 | Protein FAM49B OS=Mus musculus GN=Fam49b PE=2 SV=1                                                                          | 0,61  |
| P27659 | 60S ribosomal protein L3 OS=Mus musculus GN=Rpl3 PE=1 SV=3                                                                  | 0,606 |
| O08599 | Syntaxin-binding protein 1 OS=Mus musculus GN=Stxbp1 PE=1 SV=2                                                              | 0,606 |
| P08553 | Neurofilament medium polypeptide OS=Mus musculus GN=Nefm PE=1 SV=4                                                          | 0,604 |
| Q8R366 | Immunoglobulin superfamily member 8 OS=Mus musculus GN=Igsf8 PE=1 SV=2                                                      | 0,592 |
| Q80YN3 | Breast carcinoma-amplified sequence 1 homolog OS=Mus musculus GN=Bcas1 PE=1 SV=3                                            | 0,59  |
| F6RT34 | Myelin basic protein (Fragment) OS=Mus musculus GN=Mbp PE=1 SV=1                                                            | 0,58  |
| P06837 | Neuromodulin OS=Mus musculus GN=Gap43 PE=1 SV=1                                                                             | 0,58  |
| Q99104 | Unconventional myosin-Va OS=Mus musculus GN=Myo5a PE=1 SV=2                                                                 | 0,58  |
| Q3UR55 | ATPase, Na <sup>+</sup> /K <sup>+</sup> transporting, beta 2 polypeptide, isoform CRA_b OS=Mus musculus GN=Atp1b2 PE=2 SV=1 | 0,573 |
| Q548F2 | Guanine deaminase OS=Mus musculus GN=Gda PE=2 SV=1                                                                          | 0,567 |
| Q6ZVV7 | 60S ribosomal protein L35 OS=Mus musculus GN=Rpl35 PE=1 SV=1                                                                | 0,561 |
| Q923T9 | Calcium/calmodulin-dependent protein kinase type II subunit gamma OS=Mus musculus GN=Camk2g PE=1 SV=1                       | 0,556 |
| Q60631 | Growth factor receptor-bound protein 2 OS=Mus musculus GN=Grb2 PE=1 SV=1                                                    | 0,553 |

|        |                                                                                                         |       |
|--------|---------------------------------------------------------------------------------------------------------|-------|
| Q08331 | Calretinin OS=Mus musculus GN=Calb2 PE=1 SV=3                                                           | 0,551 |
| P62267 | 40S ribosomal protein S23 OS=Mus musculus GN=Rps23 PE=1 SV=3                                            | 0,549 |
| P68433 | Histone H3.1 OS=Mus musculus GN=Hist1h3a PE=1 SV=2                                                      | 0,544 |
| G5E866 | Splicing factor 3B subunit 1 OS=Mus musculus GN=Sf3b1 PE=1 SV=1                                         | 0,533 |
| P12658 | Calbindin OS=Mus musculus GN=Calb1 PE=1 SV=2                                                            | 0,525 |
| Q9EQK5 | Major vault protein OS=Mus musculus GN=Mvp PE=1 SV=4                                                    | 0,525 |
| Q9WV69 | Dematin OS=Mus musculus GN=Dmtn PE=1 SV=1                                                               | 0,524 |
| P29341 | Polyadenylate-binding protein 1 OS=Mus musculus GN=Pabpc1 PE=1 SV=2                                     | 0,522 |
| Q9CR57 | 60S ribosomal protein L14 OS=Mus musculus GN=Rpl14 PE=1 SV=3                                            | 0,52  |
| Q3UH59 | Myosin-10 OS=Mus musculus GN=Myh10 PE=1 SV=1                                                            | 0,519 |
| P62307 | Small nuclear ribonucleoprotein F OS=Mus musculus GN=Snrpf PE=1 SV=1                                    | 0,519 |
| Q55S83 | Flotillin 2, isoform CRA_a OS=Mus musculus GN=Flot2 PE=1 SV=1                                           | 0,519 |
| P62911 | 60S ribosomal protein L32 OS=Mus musculus GN=Rpl32 PE=1 SV=2                                            | 0,506 |
| Q5I0T8 | Ribosomal protein L19 OS=Mus musculus GN=Rpl19 PE=2 SV=1                                                | 0,506 |
| Q9CRB6 | Tubulin polymerization-promoting protein family member 3 OS=Mus musculus GN=Tppp3 PE=1 SV=1             | 0,5   |
| P97499 | Telomerase protein component 1 OS=Mus musculus GN=Tep1 PE=1 SV=1                                        | 0,499 |
| Q9R1T4 | Septin-6 OS=Mus musculus GN=Sept6 PE=1 SV=4                                                             | 0,493 |
| Q8BL66 | Early endosome antigen 1 OS=Mus musculus GN=Eea1 PE=1 SV=2                                              | 0,487 |
| Q3TYV5 | Cyclic nucleotide phosphodiesterase 1, isoform CRA_b OS=Mus musculus GN=Cnp PE=2 SV=1                   | 0,487 |
| Q9CYR0 | Single-stranded DNA-binding protein, mitochondrial OS=Mus musculus GN=Ssbp1 PE=1 SV=1                   | 0,487 |
| P20029 | 78 kDa glucose-regulated protein OS=Mus musculus GN=Hspa5 PE=1 SV=3                                     | 0,48  |
| Q4VWZ5 | Acyl-CoA-binding protein OS=Mus musculus GN=Dbi PE=1 SV=1                                               | 0,461 |
| Q497E9 | 40S ribosomal protein S8 OS=Mus musculus GN=Rps8 PE=2 SV=1                                              | 0,457 |
| P63101 | 14-3-3 protein zeta/delta OS=Mus musculus GN=Ywhaz PE=1 SV=1                                            | 0,456 |
| Q505A8 | MCG17585 OS=Mus musculus GN=Rpl39 PE=2 SV=1                                                             | 0,456 |
| Q7TQJ3 | Ubiquitin thioesterase OTUB1 OS=Mus musculus GN=Otub1 PE=1 SV=2                                         | 0,452 |
| P47911 | 60S ribosomal protein L6 OS=Mus musculus GN=Rpl6 PE=1 SV=3                                              | 0,452 |
| Q8VDD5 | Myosin-9 OS=Mus musculus GN=Myh9 PE=1 SV=4                                                              | 0,451 |
| Q60864 | Stress-induced-phosphoprotein 1 OS=Mus musculus GN=Stip1 PE=1 SV=1                                      | 0,448 |
| E9QA22 | Ribosomal protein L15 OS=Mus musculus GN=Gm10020 PE=3 SV=1                                              | 0,447 |
| P14869 | 60S acidic ribosomal protein P0 OS=Mus musculus GN=Rplp0 PE=1 SV=3                                      | 0,438 |
| Q564E8 | Ribosomal protein L4 OS=Mus musculus GN=Rpl4 PE=2 SV=1                                                  | 0,437 |
| P32067 | Lupus La protein homolog OS=Mus musculus GN=Ssb PE=1 SV=1                                               | 0,425 |
| P47963 | 60S ribosomal protein L13 OS=Mus musculus GN=Rpl13 PE=1 SV=3                                            | 0,414 |
| Q3UBP6 | Putative uncharacterized protein OS=Mus musculus GN=Actb PE=2 SV=1                                      | 0,407 |
| P62264 | 40S ribosomal protein S14 OS=Mus musculus GN=Rps14 PE=1 SV=3                                            | 0,399 |
| P63005 | Platelet-activating factor acetylhydrolase IB subunit alpha OS=Mus musculus GN=Pafah1b1 PE=1 SV=2       | 0,396 |
| Q8CI43 | Myosin light chain 6B OS=Mus musculus GN=Myl6b PE=2 SV=1                                                | 0,388 |
| B2RSH2 | Guanine nucleotide-binding protein G(i) subunit alpha-1 OS=Mus musculus GN=Gnai1 PE=1 SV=1              | 0,382 |
| Q5SVJ0 | Calcium/calmodulin-dependent protein kinase II, beta, isoform CRA_b OS=Mus musculus GN=Camk2b PE=1 SV=1 | 0,37  |
| B1AQ77 | Keratin 15, isoform CRA_a OS=Mus musculus GN=Krt15 PE=1 SV=1                                            | 0,367 |
| Q5XJF6 | Ribosomal protein OS=Mus musculus GN=Rpl10a PE=1 SV=1                                                   | 0,367 |
| P62320 | Small nuclear ribonucleoprotein Sm D3 OS=Mus musculus GN=Snrpd3 PE=1 SV=1                               | 0,36  |
| Q9D1R9 | 60S ribosomal protein L34 OS=Mus musculus GN=Rpl34 PE=1 SV=2                                            | 0,347 |

|        |                                                                           |       |
|--------|---------------------------------------------------------------------------|-------|
| P14115 | 60S ribosomal protein L27a OS=Mus musculus GN=Rpl27a PE=2 SV=5            | 0,344 |
| Z4YL23 | Fer-1-like protein 4 OS=Mus musculus GN=Fer1l4 PE=4 SV=1                  | 0,336 |
| P62889 | 60S ribosomal protein L30 OS=Mus musculus GN=Rpl30 PE=1 SV=2              | 0,319 |
| P62918 | 60S ribosomal protein L8 OS=Mus musculus GN=Rpl8 PE=1 SV=2                | 0,311 |
| Q5BLK1 | 40S ribosomal protein S6 OS=Mus musculus GN=Rps6 PE=2 SV=1                | 0,298 |
| Q8CAK3 | UPF0515 protein C19orf66 homolog OS=Mus musculus PE=2 SV=1                | 0,292 |
| P62315 | Small nuclear ribonucleoprotein Sm D1 OS=Mus musculus GN=Snrpd1 PE=1 SV=1 | 0,275 |
| P62717 | 60S ribosomal protein L18a OS=Mus musculus GN=Rpl18a PE=1 SV=1            | 0,245 |
| P60904 | DnaJ homolog subfamily C member 5 OS=Mus musculus GN=Dnajc5 PE=1 SV=1     | 0,231 |
| Q8C1Y8 | Vacuolar fusion protein CCZ1 homolog OS=Mus musculus GN=Ccz1 PE=1 SV=1    | 0,217 |
| P47962 | 60S ribosomal protein L5 OS=Mus musculus GN=Rpl5 PE=1 SV=3                | 0,203 |
| Q3V117 | ATP-citrate synthase OS=Mus musculus GN=Acly PE=1 SV=1                    | 0,173 |

## DATA FILE S1

### REGULATED PROTEINS WT: 24 vs. 3 months

| Accession | Description                                                                               | Abundance Ratio: (WT24) / (WT3) |
|-----------|-------------------------------------------------------------------------------------------|---------------------------------|
| P28663    | Beta-soluble NSF attachment protein OS=Mus musculus GN=Napb PE=1 SV=2                     | 17,199                          |
| Q6ZWX2    | Thymosin, beta 4, X chromosome OS=Mus musculus GN=Tmsb4x PE=2 SV=1                        | 12,952                          |
| E9PYN1    | Cell adhesion molecule 1 OS=Mus musculus GN=Cadm1 PE=1 SV=1                               | 11,645                          |
| Q9D3D9    | ATP synthase subunit delta, mitochondrial OS=Mus musculus GN=Atp5d PE=1 SV=1              | 10,358                          |
| P28651    | Carbonic anhydrase-related protein OS=Mus musculus GN=Ca8 PE=1 SV=5                       | 9,736                           |
| P61089    | Ubiquitin-conjugating enzyme E2 N OS=Mus musculus GN=Ube2n PE=1 SV=1                      | 9,43                            |
| Q5SZA3    | Histone cluster 1, H1c OS=Mus musculus GN=Hist1h1c PE=2 SV=1                              | 8,966                           |
| Q9JKD3    | Secretory carrier-associated membrane protein 5 OS=Mus musculus GN=Scamp5 PE=1 SV=1       | 7,509                           |
| P63040    | Complexin-1 OS=Mus musculus GN=Cplx1 PE=1 SV=1                                            | 6,894                           |
| Q9CPW4    | Actin-related protein 2/3 complex subunit 5 OS=Mus musculus GN=Arpc5 PE=2 SV=3            | 6,543                           |
| P26645    | Myristoylated alanine-rich C-kinase substrate OS=Mus musculus GN=Marcks PE=1 SV=2         | 6,515                           |
| B1AWD9    | Clathrin light chain A OS=Mus musculus GN=CltA PE=1 SV=1                                  | 6,296                           |
| D3YXH0    | Immunoglobulin superfamily member 5 OS=Mus musculus GN=Igsf5 PE=4 SV=1                    | 6,247                           |
| P43274    | Histone H1.4 OS=Mus musculus GN=Hist1h1e PE=1 SV=2                                        | 6,212                           |
| P20065    | Thymosin beta-4 OS=Mus musculus GN=Tmsb4x PE=1 SV=1                                       | 5,338                           |
| P08228    | Superoxide dismutase [Cu-Zn] OS=Mus musculus GN=Sod1 PE=1 SV=2                            | 5,303                           |
| P43276    | Histone H1.5 OS=Mus musculus GN=Hist1h1b PE=1 SV=2                                        | 5,115                           |
| P62774    | Myotrophin OS=Mus musculus GN=Mtpn PE=1 SV=2                                              | 5,082                           |
| P60761    | Neurogranin OS=Mus musculus GN=Nrgn PE=1 SV=1                                             | 4,696                           |
| P26883    | Peptidyl-prolyl cis-trans isomerase FKBP1A OS=Mus musculus GN=Fkbp1a PE=1 SV=2            | 4,695                           |
| Q149Z9    | Histone cluster 1, H1d OS=Mus musculus GN=Hist1h1d PE=2 SV=1                              | 4,689                           |
| P84086    | Complexin-2 OS=Mus musculus GN=Cplx2 PE=1 SV=1                                            | 4,52                            |
| Q60829    | Protein phosphatase 1 regulatory subunit 1B OS=Mus musculus GN=Ppp1r1b PE=2 SV=2          | 4,487                           |
| Q6GT24    | Peroxiredoxin 6 OS=Mus musculus GN=Prdx6 PE=1 SV=1                                        | 4,479                           |
| P13595    | Neural cell adhesion molecule 1 OS=Mus musculus GN=Ncam1 PE=1 SV=3                        | 4,18                            |
| O08749    | Dihydrolipoyl dehydrogenase, mitochondrial OS=Mus musculus GN=Did PE=1 SV=2               | 4,18                            |
| P61979    | Heterogeneous nuclear ribonucleoprotein K OS=Mus musculus GN=Hnnpk PE=1 SV=1              | 4,093                           |
| Q9JKC6    | Cell cycle exit and neuronal differentiation protein 1 OS=Mus musculus GN=Cend1 PE=1 SV=1 | 3,964                           |
| P02802    | Metallothionein-1 OS=Mus musculus GN=Mt1 PE=1 SV=1                                        | 3,841                           |

|            |                                                                                       |       |
|------------|---------------------------------------------------------------------------------------|-------|
| Q63810     | Calcineurin subunit B type 1 OS=Mus musculus GN=Ppp3r1 PE=1 SV=3                      | 3,837 |
| Q8BVI4     | Dihydropteridine reductase OS=Mus musculus GN=Qdpr PE=1 SV=2                          | 3,815 |
| Q9QYCO     | Alpha-adducin OS=Mus musculus GN=Add1 PE=1 SV=2                                       | 3,773 |
| G5E902     | MCG10343, isoform CRA_b OS=Mus musculus GN=Slc25a3 PE=1 SV=1                          | 3,754 |
| P32848     | Parvalbumin alpha OS=Mus musculus GN=Pvalb PE=1 SV=3                                  | 3,748 |
| P28184     | Metallothionein-3 OS=Mus musculus GN=Mt3 PE=1 SV=1                                    | 3,637 |
| P62204     | Calmodulin OS=Mus musculus GN=Calm1 PE=1 SV=2                                         | 3,634 |
| Q543Y7     | Putative uncharacterized protein OS=Mus musculus GN=Pacsin1 PE=2 SV=1                 | 3,629 |
| Q9Z2D6-2   | Isoform B of Methyl-CpG-binding protein 2 OS=Mus musculus GN=Mecp2                    | 3,602 |
| G5E8N5     | L-lactate dehydrogenase OS=Mus musculus GN=Ldha PE=1 SV=1                             | 3,561 |
| Q9WTT4     | V-type proton ATPase subunit G 2 OS=Mus musculus GN=Atp6v1g2 PE=3 SV=1                | 3,54  |
| A0A087WQN2 | Prothymosin alpha (Fragment) OS=Mus musculus GN=Ptma PE=1 SV=1                        | 3,536 |
| Q61361     | Brevican core protein OS=Mus musculus GN=Bcan PE=1 SV=2                               | 3,507 |
| P19157     | Glutathione S-transferase P 1 OS=Mus musculus GN=Gstp1 PE=1 SV=2                      | 3,447 |
| Q4VWZ5     | Acyl-CoA-binding protein OS=Mus musculus GN=Dbi PE=1 SV=1                             | 3,436 |
| Q3TTY5     | Keratin, type II cytoskeletal 2 epidermal OS=Mus musculus GN=Krt2 PE=1 SV=1           | 3,424 |
| O08539     | Myc box-dependent-interacting protein 1 OS=Mus musculus GN=Bin1 PE=1 SV=1             | 3,412 |
| P10922     | Histone H1.0 OS=Mus musculus GN=H1f0 PE=2 SV=4                                        | 3,345 |
| P08249     | Malate dehydrogenase, mitochondrial OS=Mus musculus GN=Mdh2 PE=1 SV=3                 | 3,329 |
| Q91XV3     | Brain acid soluble protein 1 OS=Mus musculus GN=Basp1 PE=1 SV=3                       | 3,237 |
| A0A075B5P2 | Protein Igkc (Fragment) OS=Mus musculus GN=Igkc PE=1 SV=1                             | 3,216 |
| E9Q035     | Protein Gm20425 OS=Mus musculus GN=Gm20425 PE=4 SV=1                                  | 3,149 |
| Q99PT1     | Rho GDP-dissociation inhibitor 1 OS=Mus musculus GN=Arhgdia PE=1 SV=3                 | 3,105 |
| E9PZF0     | Nucleoside diphosphate kinase OS=Mus musculus GN=Gm20390 PE=3 SV=1                    | 3,097 |
| P52760     | Ribonuclease UK114 OS=Mus musculus GN=Hrsp12 PE=1 SV=3                                | 3,075 |
| Q9WV69     | Dematin OS=Mus musculus GN=Dmtn PE=1 SV=1                                             | 3,036 |
| P48036     | Annexin A5 OS=Mus musculus GN=Anxa5 PE=1 SV=1                                         | 3,036 |
| Q02105     | Complement C1q subcomponent subunit C OS=Mus musculus GN=C1qc PE=2 SV=2               | 3,033 |
| O88569     | Heterogeneous nuclear ribonucleoproteins A2/B1 OS=Mus musculus GN=Hnrnpa2b1 PE=1 SV=2 | 2,987 |
| P27661     | Histone H2AX OS=Mus musculus GN=H2afx PE=1 SV=2                                       | 2,98  |
| Q9DBJ1     | Phosphoglycerate mutase 1 OS=Mus musculus GN=Pgam1 PE=1 SV=3                          | 2,963 |
| Q9ESM3     | Hyaluronan and proteoglycan link protein 2 OS=Mus musculus GN=Hapln2 PE=1 SV=1        | 2,956 |
| Q9Z204     | Heterogeneous nuclear ribonucleoproteins C1/C2 OS=Mus musculus GN=Hnrnpc PE=1 SV=1    | 2,944 |



|            |                                                                                          |       |
|------------|------------------------------------------------------------------------------------------|-------|
| P61922     | 4-aminobutyrate aminotransferase, mitochondrial OS=Mus musculus GN=Abat PE=1 SV=1        | 2,942 |
| P17751     | Triosephosphate isomerase OS=Mus musculus GN=Tpi1 PE=1 SV=4                              | 2,933 |
| Q9DBG3     | AP-2 complex subunit beta OS=Mus musculus GN=Ap2b1 PE=1 SV=1                             | 2,896 |
| Q61598     | Rab GDP dissociation inhibitor beta OS=Mus musculus GN=Gdi2 PE=1 SV=1                    | 2,888 |
| A0A075B6A0 | Ig mu chain C region (Fragment) OS=Mus musculus GN=Ighm PE=1 SV=2                        | 2,831 |
| P05063     | Fructose-bisphosphate aldolase C OS=Mus musculus GN=Aldoc PE=1 SV=4                      | 2,804 |
| P21460     | Cystatin-C OS=Mus musculus GN=Cst3 PE=1 SV=2                                             | 2,769 |
| P50518     | V-type proton ATPase subunit E 1 OS=Mus musculus GN=Atp6v1e1 PE=1 SV=2                   | 2,751 |
| E9Q7Q3     | Tropomyosin alpha-3 chain OS=Mus musculus GN=Tpm3 PE=1 SV=1                              | 2,751 |
| Q61782     | Type I epidermal keratin mRNA, 3'end (Fragment) OS=Mus musculus PE=2 SV=1                | 2,733 |
| Q8CI43     | Myosin light chain 6B OS=Mus musculus GN=Myl6b PE=2 SV=1                                 | 2,729 |
| Q9Z2T6     | Keratin, type II cuticular Hb5 OS=Mus musculus GN=Krt85 PE=2 SV=2                        | 2,725 |
| A0A0G2JEG8 | Amphiphysin OS=Mus musculus GN=Amph PE=1 SV=1                                            | 2,701 |
| Q9R0P9     | Ubiquitin carboxyl-terminal hydrolase isozyme L1 OS=Mus musculus GN=Uchl1 PE=1 SV=1      | 2,671 |
| P98086     | Complement C1q subcomponent subunit A OS=Mus musculus GN=C1qa PE=1 SV=2                  | 2,655 |
| Q8BWF0     | Succinate-semialdehyde dehydrogenase, mitochondrial OS=Mus musculus GN=Aldh5a1 PE=1 SV=1 | 2,651 |
| P99027     | 60S acidic ribosomal protein P2 OS=Mus musculus GN=Rplp2 PE=1 SV=3                       | 2,65  |
| Q60668     | Heterogeneous nuclear ribonucleoprotein D0 OS=Mus musculus GN=Hnrnpd PE=1 SV=2           | 2,639 |
| Q9EQU5-2   | Isoform 2 of Protein SET OS=Mus musculus GN=Set                                          | 2,585 |
| Q91VB8     | Alpha globin 1 OS=Mus musculus GN=haemaglobin alpha 2 PE=1 SV=1                          | 2,527 |
| P14152     | Malate dehydrogenase, cytoplasmic OS=Mus musculus GN=Mdh1 PE=1 SV=3                      | 2,513 |
| P99024     | Tubulin beta-5 chain OS=Mus musculus GN=Tubb5 PE=1 SV=1                                  | 2,508 |
| Q68FL4     | Putative adenosylhomocysteinase 3 OS=Mus musculus GN=Ahcyl2 PE=1 SV=1                    | 2,494 |
| Q04690     | Neurofibromin OS=Mus musculus GN=Nf1 PE=1 SV=1                                           | 2,489 |
| D3Z722     | 40S ribosomal protein S19 OS=Mus musculus GN=Rps19 PE=1 SV=1                             | 2,476 |
| Q9DCD0     | 6-phosphogluconate dehydrogenase, decarboxylating OS=Mus musculus GN=Pgd PE=1 SV=3       | 2,476 |
| P28474     | Alcohol dehydrogenase class-3 OS=Mus musculus GN=Adh5 PE=1 SV=3                          | 2,453 |
| B2RTK3     | Histone H2B OS=Mus musculus GN=Hist1h2bm PE=2 SV=1                                       | 2,451 |
| Q3UY00     | Protein S100 OS=Mus musculus GN=S100b PE=2 SV=1                                          | 2,441 |
| Q6W8Q3     | Purkinje cell protein 4-like protein 1 OS=Mus musculus GN=Pcp4l1 PE=1 SV=1               | 2,407 |
| P62259     | 14-3-3 protein epsilon OS=Mus musculus GN=Ywhae PE=1 SV=1                                | 2,399 |
| A8DUK4     | Beta-globin OS=Mus musculus GN=Hbbt1 PE=1 SV=1                                           | 2,39  |
| H3BKH6     | S-formylglutathione hydrolase OS=Mus musculus GN=Esd PE=1 SV=1                           | 2,378 |

|            |                                                                                              |       |
|------------|----------------------------------------------------------------------------------------------|-------|
| J3QMG3     | Voltage-dependent anion-selective channel protein 3 OS=Mus musculus GN=Vdac3 PE=1 SV=1       | 2,378 |
| Q9CZ13     | Cytochrome b-c1 complex subunit 1, mitochondrial OS=Mus musculus GN=Uqcrc1 PE=1 SV=2         | 2,378 |
| A0A0G2JFT8 | Protein RUFY3 OS=Mus musculus GN=Rufy3 PE=1 SV=1                                             | 2,374 |
| Q4FJX9     | Superoxide dismutase OS=Mus musculus GN=Sod2 PE=2 SV=1                                       | 2,373 |
| P62858     | 40S ribosomal protein S28 OS=Mus musculus GN=Rps28 PE=1 SV=1                                 | 2,364 |
| P09405     | Nucleolin OS=Mus musculus GN=Ncl PE=1 SV=2                                                   | 2,353 |
| Q91ZZ3     | Beta-synuclein OS=Mus musculus GN=Sncb PE=1 SV=1                                             | 2,347 |
| Q3ULD5     | Methylcrotonoyl-CoA carboxylase beta chain, mitochondrial OS=Mus musculus GN=Mccc2 PE=1 SV=1 | 2,338 |
| Q3U1N0     | Coronin OS=Mus musculus GN=Coro1a PE=2 SV=1                                                  | 2,33  |
| Q545B6     | Stathmin OS=Mus musculus GN=Stmn1 PE=2 SV=1                                                  | 2,29  |
| Q5EBQ2     | MCG7941, isoform CRA_f OS=Mus musculus GN=Pebp1 PE=2 SV=1                                    | 2,28  |
| E9PYH0     | Versican core protein OS=Mus musculus GN=Vcan PE=1 SV=1                                      | 2,276 |
| Q6IRU5     | Clathrin light chain B OS=Mus musculus GN=Cltb PE=1 SV=1                                     | 2,269 |
| Q61282     | Aggrecan core protein OS=Mus musculus GN=Acan PE=1 SV=2                                      | 2,244 |
| P05201     | Aspartate aminotransferase, cytoplasmic OS=Mus musculus GN=Got1 PE=1 SV=3                    | 2,22  |
| P20357     | Microtubule-associated protein 2 OS=Mus musculus GN=Map2 PE=1 SV=2                           | 2,209 |
| A0A0A0MQF6 | Glyceraldehyde-3-phosphate dehydrogenase OS=Mus musculus GN=Gapdh PE=1 SV=1                  | 2,205 |
| P10649     | Glutathione S-transferase Mu 1 OS=Mus musculus GN=Gstm1 PE=1 SV=2                            | 2,176 |
| P31650     | Sodium- and chloride-dependent GABA transporter 3 OS=Mus musculus GN=Slc6a11 PE=1 SV=2       | 2,176 |
| P60710     | Actin, cytoplasmic 1 OS=Mus musculus GN=Actb PE=1 SV=1                                       | 2,161 |
| Q99KI0     | Aconitate hydratase, mitochondrial OS=Mus musculus GN=Aco2 PE=1 SV=1                         | 2,121 |
| P14873     | Microtubule-associated protein 1B OS=Mus musculus GN=Map1b PE=1 SV=2                         | 2,117 |
| P68510     | 14-3-3 protein eta OS=Mus musculus GN=Ywhah PE=1 SV=2                                        | 2,114 |
| P01592     | Immunoglobulin J chain OS=Mus musculus GN=Igj PE=2 SV=4                                      | 2,078 |
| Q9CX86     | Heterogeneous nuclear ribonucleoprotein A0 OS=Mus musculus GN=Hnrnpa0 PE=1 SV=1              | 2,055 |
| P60335     | Poly(rC)-binding protein 1 OS=Mus musculus GN=Pcbp1 PE=1 SV=1                                | 2,049 |
| P51863     | V-type proton ATPase subunit d 1 OS=Mus musculus GN=Atp6v0d1 PE=1 SV=2                       | 2,047 |
| Q9Z1G3     | V-type proton ATPase subunit C 1 OS=Mus musculus GN=Atp6v1c1 PE=1 SV=4                       | 2,041 |
| Q9CRB6     | Tubulin polymerization-promoting protein family member 3 OS=Mus musculus GN=Tppp3 PE=1 SV=1  | 2,031 |
| P50396     | Rab GDP dissociation inhibitor alpha OS=Mus musculus GN=Gdi1 PE=1 SV=3                       | 2,031 |
| Q7TQD2     | Tubulin polymerization-promoting protein OS=Mus musculus GN=Tppp PE=1 SV=1                   | 2,02  |
| Q9CPU0     | Lactoylglutathione lyase OS=Mus musculus GN=Glo1 PE=1 SV=3                                   | 2,019 |
| Q810U4     | Neuronal cell adhesion molecule OS=Mus musculus GN=Nrcam PE=1 SV=2                           | 2,014 |

|        |                                                                                                  |       |
|--------|--------------------------------------------------------------------------------------------------|-------|
| Q9Z1G4 | V-type proton ATPase 116 kDa subunit a isoform 1 OS=Mus musculus GN=Atp6v0a1 PE=1 SV=3           | 2,005 |
| Q9JJV2 | Profilin-2 OS=Mus musculus GN=Pfn2 PE=1 SV=3                                                     | 1,989 |
| P17156 | Heat shock-related 70 kDa protein 2 OS=Mus musculus GN=Hspa2 PE=1 SV=2                           | 1,973 |
| P06745 | Glucose-6-phosphate isomerase OS=Mus musculus GN=Gpi PE=1 SV=4                                   | 1,963 |
| Q01853 | Transitional endoplasmic reticulum ATPase OS=Mus musculus GN=Vcp PE=1 SV=4                       | 1,962 |
| P68372 | Tubulin beta-4B chain OS=Mus musculus GN=Tubb4b PE=1 SV=1                                        | 1,96  |
| Q3UL22 | Chaperonin subunit 8 (Theta), isoform CRA_a OS=Mus musculus GN=Cct8 PE=2 SV=1                    | 1,946 |
| A6ZI44 | Fructose-bisphosphate aldolase OS=Mus musculus GN=Aldoa PE=1 SV=1                                | 1,942 |
| P57780 | Alpha-actinin-4 OS=Mus musculus GN=Actn4 PE=1 SV=1                                               | 1,93  |
| Q9R0Y5 | Adenylate kinase isoenzyme 1 OS=Mus musculus GN=Ak1 PE=1 SV=1                                    | 1,925 |
| P13707 | Glycerol-3-phosphate dehydrogenase [NAD(+)], cytoplasmic OS=Mus musculus GN=Gpd1 PE=1 SV=3       | 1,92  |
| Q548F2 | Guanine deaminase OS=Mus musculus GN=Gda PE=2 SV=1                                               | 1,919 |
| Q9CZC8 | Secernin-1 OS=Mus musculus GN=Scrn1 PE=1 SV=1                                                    | 1,909 |
| P35700 | Peroxiredoxin-1 OS=Mus musculus GN=Prdx1 PE=1 SV=1                                               | 1,904 |
| P05202 | Aspartate aminotransferase, mitochondrial OS=Mus musculus GN=Got2 PE=1 SV=1                      | 1,903 |
| P16125 | L-lactate dehydrogenase B chain OS=Mus musculus GN=Ldhb PE=1 SV=2                                | 1,882 |
| P14106 | Complement C1q subcomponent subunit B OS=Mus musculus GN=C1qb PE=1 SV=2                          | 1,876 |
| Q76MZ3 | Serine/threonine-protein phosphatase 2A 65 kDa regulatory subunit A alpha isoform OS=Mus musculi | 1,875 |
| Q7M6W1 | Reticulon OS=Mus musculus GN=Rtn1 PE=1 SV=1                                                      | 1,87  |
| Q546G4 | Albumin 1 OS=Mus musculus GN=Alb PE=2 SV=1                                                       | 1,863 |
| F6VW30 | 14-3-3 protein theta (Fragment) OS=Mus musculus GN=Ywhaq PE=1 SV=1                               | 1,861 |
| Q9QUP5 | Hyaluronan and proteoglycan link protein 1 OS=Mus musculus GN=Hapln1 PE=1 SV=1                   | 1,85  |
| Q99PU5 | Long-chain-fatty-acid--CoA ligase ACSBG1 OS=Mus musculus GN=Acsbg1 PE=1 SV=1                     | 1,847 |
| P00920 | Carbonic anhydrase 2 OS=Mus musculus GN=Ca2 PE=1 SV=4                                            | 1,834 |
| P58252 | Elongation factor 2 OS=Mus musculus GN=Eef2 PE=1 SV=2                                            | 1,833 |
| Q80TL4 | PHD finger protein 24 OS=Mus musculus GN=Phf24 PE=1 SV=2                                         | 1,832 |
| P46460 | Vesicle-fusing ATPase OS=Mus musculus GN=Nsf PE=1 SV=2                                           | 1,825 |
| D3Z4B2 | Gamma-soluble NSF attachment protein (Fragment) OS=Mus musculus GN=Napg PE=1 SV=1                | 1,823 |
| Q8C2Q7 | Heterogeneous nuclear ribonucleoprotein H OS=Mus musculus GN=Hnrnph1 PE=1 SV=1                   | 1,819 |
| Q642L7 | MCG13441 OS=Mus musculus GN=Rps27a PE=2 SV=1                                                     | 1,815 |
| Q5FW97 | Enolase 1, alpha non-neuron OS=Mus musculus GN=EG433182 PE=2 SV=1                                | 1,814 |
| P63038 | 60 kDa heat shock protein, mitochondrial OS=Mus musculus GN=Hspd1 PE=1 SV=1                      | 1,812 |
| Q3U2G2 | Heat shock 70 kDa protein 4 OS=Mus musculus GN=Hspa4 PE=1 SV=1                                   | 1,806 |

|            |                                                                                               |       |
|------------|-----------------------------------------------------------------------------------------------|-------|
| A6H611     | Mitochondrial intermediate peptidase OS=Mus musculus GN=Mipep PE=1 SV=1                       | 1,805 |
| B2RXY7     | Carbonyl reductase 1 OS=Mus musculus GN=Cbr1 PE=2 SV=1                                        | 1,802 |
| A2ALV3     | Endophilin-A1 OS=Mus musculus GN=Sh3gl2 PE=1 SV=1                                             | 1,796 |
| P11031     | Activated RNA polymerase II transcriptional coactivator p15 OS=Mus musculus GN=Sub1 PE=1 SV=3 | 1,789 |
| B1AQW2     | Microtubule-associated protein OS=Mus musculus GN=Mapt PE=1 SV=1                              | 1,773 |
| Q8K183     | Pyridoxal kinase OS=Mus musculus GN=Pdxk PE=1 SV=1                                            | 1,772 |
| B0QZN5     | Vesicle-associated membrane protein 2 OS=Mus musculus GN=Vamp2 PE=1 SV=1                      | 1,764 |
| P26443     | Glutamate dehydrogenase 1, mitochondrial OS=Mus musculus GN=Glud1 PE=1 SV=1                   | 1,759 |
| Q9CZU6     | Citrate synthase, mitochondrial OS=Mus musculus GN=Cs PE=1 SV=1                               | 1,753 |
| Q78ZJ8     | MCG22989, isoform CRA_b OS=Mus musculus GN=Rab11b PE=2 SV=1                                   | 1,747 |
| O55091     | Protein IMPACT OS=Mus musculus GN=Impact PE=1 SV=2                                            | 1,74  |
| A0A097PUG4 | Anti-lox-1 15C4 light chain OS=Mus musculus PE=2 SV=1                                         | 1,734 |
| Q3U7E0     | Putative uncharacterized protein OS=Mus musculus GN=Atp6v1g1 PE=2 SV=1                        | 1,72  |
| Q3UV17     | Keratin, type II cytoskeletal 2 oral OS=Mus musculus GN=Krt76 PE=2 SV=1                       | 1,71  |
| Q9QYX7     | Protein piccolo OS=Mus musculus GN=Pclo PE=1 SV=4                                             | 1,702 |
| B9EKR1     | Receptor-type tyrosine-protein phosphatase zeta OS=Mus musculus GN=Ptporz1 PE=1 SV=1          | 1,7   |
| P70349     | Histidine triad nucleotide-binding protein 1 OS=Mus musculus GN=Hint1 PE=1 SV=3               | 1,687 |
| A2ARP8     | Microtubule-associated protein 1A OS=Mus musculus GN=Map1a PE=1 SV=1                          | 1,683 |
| Q9JLZ3     | Methylglutaconyl-CoA hydratase, mitochondrial OS=Mus musculus GN=Auh PE=1 SV=1                | 1,669 |
| P68369     | Tubulin alpha-1A chain OS=Mus musculus GN=Tuba1a PE=1 SV=1                                    | 1,656 |
| A0A087WP80 | Limbic system-associated membrane protein OS=Mus musculus GN=Lsamp PE=1 SV=1                  | 1,649 |
| Q922J6     | Tetraspanin-2 OS=Mus musculus GN=Tspan2 PE=1 SV=1                                             | 1,635 |
| Q9D6F9     | Tubulin beta-4A chain OS=Mus musculus GN=Tubb4a PE=1 SV=3                                     | 1,627 |
| P17742     | Peptidyl-prolyl cis-trans isomerase A OS=Mus musculus GN=Ppia PE=1 SV=2                       | 1,624 |
| Q3UMU9     | Hepatoma-derived growth factor-related protein 2 OS=Mus musculus GN=Hdgfrp2 PE=1 SV=1         | 1,622 |
| A2AWN8     | YTH domain family 1, isoform CRA_a OS=Mus musculus GN=Ythdf1 PE=1 SV=1                        | 1,601 |
| Q9QXV0     | ProSAAS OS=Mus musculus GN=Pcsk1n PE=1 SV=2                                                   | 1,6   |
| Q7TSJ2     | Microtubule-associated protein 6 OS=Mus musculus GN=Map6 PE=1 SV=2                            | 1,596 |
| F8WGL3     | Cofilin-1 OS=Mus musculus GN=Cfl1 PE=1 SV=1                                                   | 1,593 |
| F6RSK3     | Protein Gm17430 OS=Mus musculus GN=Gm17430 PE=4 SV=1                                          | 1,587 |
| P56399     | Ubiquitin carboxyl-terminal hydrolase 5 OS=Mus musculus GN=Usp5 PE=1 SV=1                     | 1,586 |
| P55066     | Neurocan core protein OS=Mus musculus GN=Ncan PE=2 SV=1                                       | 1,586 |
| A0A075B5P3 | Protein Ighg2b (Fragment) OS=Mus musculus GN=Ighg2b PE=1 SV=1                                 | 1,58  |

|            |                                                                                                    |       |
|------------|----------------------------------------------------------------------------------------------------|-------|
| P14211     | Calreticulin OS=Mus musculus GN=Calr PE=1 SV=1                                                     | 1,577 |
| Q04447     | Creatine kinase B-type OS=Mus musculus GN=Ckb PE=1 SV=1                                            | 1,576 |
| F6VPT0     | Protein Ccdc163 (Fragment) OS=Mus musculus GN=Ccdc163 PE=4 SV=1                                    | 1,571 |
| Q61171     | Peroxiredoxin-2 OS=Mus musculus GN=Prdx2 PE=1 SV=3                                                 | 1,57  |
| P05132     | cAMP-dependent protein kinase catalytic subunit alpha OS=Mus musculus GN=Prkaca PE=1 SV=3          | 1,568 |
| P62137     | Serine/threonine-protein phosphatase PP1-alpha catalytic subunit OS=Mus musculus GN=Ppp1ca PE=     | 1,565 |
| P12658     | Calbindin OS=Mus musculus GN=Calb1 PE=1 SV=2                                                       | 1,561 |
| B9EHN0     | Ubiquitin-activating enzyme E1, Chr X OS=Mus musculus GN=Uba1 PE=2 SV=1                            | 1,554 |
| Q08331     | Calretinin OS=Mus musculus GN=Calb2 PE=1 SV=3                                                      | 1,545 |
| A8IP69     | 14-3-3 protein gamma subtype OS=Mus musculus GN=Ywhag PE=2 SV=1                                    | 1,537 |
| P80316     | T-complex protein 1 subunit epsilon OS=Mus musculus GN=Cct5 PE=1 SV=1                              | 1,536 |
| F6YVP7     | Protein Gm10260 OS=Mus musculus GN=Gm10260 PE=3 SV=2                                               | 1,53  |
| P63276     | 40S ribosomal protein S17 OS=Mus musculus GN=Rps17 PE=1 SV=2                                       | 1,523 |
| P09411     | Phosphoglycerate kinase 1 OS=Mus musculus GN=Pgk1 PE=1 SV=4                                        | 1,521 |
| Q3U4U6     | T-complex protein 1 subunit gamma OS=Mus musculus GN=Cct3 PE=2 SV=1                                | 1,52  |
| P47857     | ATP-dependent 6-phosphofructokinase, muscle type OS=Mus musculus GN=Pfkm PE=1 SV=3                 | 1,517 |
| Q55XR6     | Clathrin heavy chain OS=Mus musculus GN=Cltc PE=1 SV=1                                             | 1,512 |
| E0CYV0     | Protein-L-isoaspartate O-methyltransferase OS=Mus musculus GN=Pcmt1 PE=1 SV=1                      | 1,491 |
| P14869     | 60S acidic ribosomal protein P0 OS=Mus musculus GN=Rplp0 PE=1 SV=3                                 | 1,486 |
| O55042     | Alpha-synuclein OS=Mus musculus GN=SncA PE=1 SV=2                                                  | 1,486 |
| P01787     | Ig heavy chain V regions TEPC 15/S107/HPCM1/HPCM2/HPCM3 OS=Mus musculus PE=1 SV=1                  | 1,482 |
| Q8BGT8     | Phytanoyl-CoA hydroxylase-interacting protein-like OS=Mus musculus GN=Phyhipl PE=2 SV=1            | 1,481 |
| P40142     | Transketolase OS=Mus musculus GN=Tkt PE=1 SV=1                                                     | 1,476 |
| Q3UYK6     | Amino acid transporter OS=Mus musculus GN=Slc1a2 PE=2 SV=1                                         | 1,465 |
| Q8C1B7     | Septin-11 OS=Mus musculus GN=Sept11 PE=1 SV=4                                                      | 1,454 |
| P19783     | Cytochrome c oxidase subunit 4 isoform 1, mitochondrial OS=Mus musculus GN=Cox4i1 PE=1 SV=2        | 1,454 |
| A0A0A6YXW6 | Protein IgHa (Fragment) OS=Mus musculus GN=IgHa PE=1 SV=1                                          | 1,442 |
| O88342     | WD repeat-containing protein 1 OS=Mus musculus GN=Wdr1 PE=1 SV=3                                   | 1,437 |
| Q3V117     | ATP-citrate synthase OS=Mus musculus GN=Acly PE=1 SV=1                                             | 1,434 |
| Q9Z2I9     | Succinate--CoA ligase [ADP-forming] subunit beta, mitochondrial OS=Mus musculus GN=Sucla2 PE=1 SV= | 1,429 |
| P52480     | Pyruvate kinase PKM OS=Mus musculus GN=Pkm PE=1 SV=4                                               | 1,422 |
| Q921M7     | Protein FAM49B OS=Mus musculus GN=Fam49b PE=2 SV=1                                                 | 1,415 |
| Q8BMS1     | Trifunctional enzyme subunit alpha, mitochondrial OS=Mus musculus GN=Hadha PE=1 SV=1               | 1,406 |

|            |                                                                                                    |       |
|------------|----------------------------------------------------------------------------------------------------|-------|
| Q8K0T0     | Reticulon-1 OS=Mus musculus GN=Rtn1 PE=1 SV=1                                                      | 1,403 |
| P70168     | Importin subunit beta-1 OS=Mus musculus GN=Kpnb1 PE=1 SV=2                                         | 1,402 |
| Q545V3     | Enolase 2, gamma neuronal, isoform CRA_a OS=Mus musculus GN=Eno2 PE=2 SV=1                         | 1,399 |
| P62631     | Elongation factor 1-alpha 2 OS=Mus musculus GN=Eef1a2 PE=1 SV=1                                    | 1,398 |
| Q56A15     | Cytochrome c OS=Mus musculus GN=Cycc PE=2 SV=1                                                     | 1,378 |
| P17710     | Hexokinase-1 OS=Mus musculus GN=Hk1 PE=1 SV=3                                                      | 1,369 |
| Q3TXU4     | Apolipoprotein E, isoform CRA_h OS=Mus musculus GN=ApoE PE=2 SV=1                                  | 1,369 |
| Q3UNV7     | Putative uncharacterized protein OS=Mus musculus GN=Mlf2 PE=2 SV=1                                 | 1,367 |
| Q9ERD7     | Tubulin beta-3 chain OS=Mus musculus GN=Tubb3 PE=1 SV=1                                            | 1,361 |
| Q9D6R2     | Isocitrate dehydrogenase [NAD] subunit alpha, mitochondrial OS=Mus musculus GN=Idh3a PE=1 SV=1     | 1,355 |
| Q542X7     | Chaperonin subunit 2 (Beta), isoform CRA_a OS=Mus musculus GN=Cct2 PE=2 SV=1                       | 1,355 |
| P40336     | Vacuolar protein sorting-associated protein 26A OS=Mus musculus GN=Vps26a PE=1 SV=1                | 1,348 |
| Q58E64     | Elongation factor 1-alpha OS=Mus musculus GN=Eef1a1 PE=2 SV=1                                      | 1,342 |
| P48722     | Heat shock 70 kDa protein 4L OS=Mus musculus GN=Hspa4l PE=1 SV=2                                   | 1,338 |
| O08553     | Dihydropyrimidinase-related protein 2 OS=Mus musculus GN=Dpysl2 PE=1 SV=2                          | 1,333 |
| A0A076FRG6 | KCC2a variant 1 OS=Mus musculus GN=Slc12a5 PE=2 SV=1                                               | 1,332 |
| Q5YLV3     | Ribosomal protein S3 OS=Mus musculus GN=Rps3 PE=2 SV=1                                             | 1,322 |
| Q3UY21     | Myelin-oligodendrocyte glycoprotein OS=Mus musculus GN=Mog PE=1 SV=1                               | 1,309 |
| P97300     | Neuroplastin OS=Mus musculus GN=Nptn PE=1 SV=3                                                     | 1,309 |
| P63005     | Platelet-activating factor acetylhydrolase IB subunit alpha OS=Mus musculus GN=Pafah1b1 PE=1 SV=2  | 1,308 |
| P63101     | 14-3-3 protein zeta/delta OS=Mus musculus GN=Ywhaz PE=1 SV=1                                       | 1,308 |
| Q9DCW4     | Electron transfer flavoprotein subunit beta OS=Mus musculus GN=Etfb PE=1 SV=3                      | 1,303 |
| Q61990     | Poly(rC)-binding protein 2 OS=Mus musculus GN=Pcbp2 PE=1 SV=1                                      | 1,303 |
| P06837     | Neuromodulin OS=Mus musculus GN=Gap43 PE=1 SV=1                                                    | 1,302 |
| P60766     | Cell division control protein 42 homolog OS=Mus musculus GN=Cdc42 PE=1 SV=2                        | 1,3   |
| P62880     | Guanine nucleotide-binding protein G(I)/G(S)/G(T) subunit beta-2 OS=Mus musculus GN=Gnb2 PE=1 SV=1 | 0,749 |
| P46097     | Synaptotagmin-2 OS=Mus musculus GN=Syt2 PE=1 SV=1                                                  | 0,746 |
| P97427     | Dihydropyrimidinase-related protein 1 OS=Mus musculus GN=Crmp1 PE=1 SV=1                           | 0,743 |
| Q3TQ70     | Beta1 subunit of GTP-binding protein OS=Mus musculus GN=Gnb1 PE=2 SV=1                             | 0,743 |
| A2AQR0     | Glycerol-3-phosphate dehydrogenase OS=Mus musculus GN=Gpd2 PE=1 SV=1                               | 0,738 |
| D3Z656     | Synaptojanin-1 OS=Mus musculus GN=Synj1 PE=1 SV=1                                                  | 0,733 |
| Q9CVB6     | Actin-related protein 2/3 complex subunit 2 OS=Mus musculus GN=Arpc2 PE=1 SV=3                     | 0,732 |
| Q9WTL4     | Insulin receptor-related protein OS=Mus musculus GN=Insrr PE=1 SV=2                                | 0,731 |

|            |                                                                                                   |       |
|------------|---------------------------------------------------------------------------------------------------|-------|
| Q9QZQ8     | Core histone macro-H2A.1 OS=Mus musculus GN=H2afy PE=1 SV=3                                       | 0,724 |
| P52480-2   | Isoform M1 of Pyruvate kinase PKM OS=Mus musculus GN=Pkm                                          | 0,719 |
| P47963     | 60S ribosomal protein L13 OS=Mus musculus GN=Rpl13 PE=1 SV=3                                      | 0,716 |
| O54962     | Barrier-to-autointegration factor OS=Mus musculus GN=Banf1 PE=1 SV=1                              | 0,715 |
| Q91ZU6     | Dystonin OS=Mus musculus GN=Dst PE=1 SV=2                                                         | 0,714 |
| Q99M71     | Mammalian ependymin-related protein 1 OS=Mus musculus GN=Epdr1 PE=2 SV=1                          | 0,712 |
| Q9CXS4     | Centromere protein V OS=Mus musculus GN=Cenpv PE=1 SV=2                                           | 0,711 |
| P12787     | Cytochrome c oxidase subunit 5A, mitochondrial OS=Mus musculus GN=Cox5a PE=1 SV=2                 | 0,709 |
| P08752     | Guanine nucleotide-binding protein G(i) subunit alpha-2 OS=Mus musculus GN=Gnai2 PE=1 SV=5        | 0,707 |
| P35235     | Tyrosine-protein phosphatase non-receptor type 11 OS=Mus musculus GN=Ptpn11 PE=1 SV=2             | 0,707 |
| Q8R1B4     | Eukaryotic translation initiation factor 3 subunit C OS=Mus musculus GN=Eif3c PE=1 SV=1           | 0,706 |
| Q9EQF6     | Dihydropyrimidinase-related protein 5 OS=Mus musculus GN=Dpysl5 PE=1 SV=1                         | 0,703 |
| Q9WV34     | MAGUK p55 subfamily member 2 OS=Mus musculus GN=Mpp2 PE=1 SV=1                                    | 0,698 |
| P14148     | 60S ribosomal protein L7 OS=Mus musculus GN=Rpl7 PE=1 SV=2                                        | 0,697 |
| P19096     | Fatty acid synthase OS=Mus musculus GN=Fasn PE=1 SV=2                                             | 0,69  |
| Q9R1P1     | Proteasome subunit beta type-3 OS=Mus musculus GN=Psm3 PE=1 SV=1                                  | 0,685 |
| E9PUA3     | IQ motif and SEC7 domain-containing protein 1 OS=Mus musculus GN=Iqsec1 PE=1 SV=1                 | 0,684 |
| Q8BFZ9     | Erlin-2 OS=Mus musculus GN=Erlin2 PE=1 SV=1                                                       | 0,681 |
| Q8VEK3     | Heterogeneous nuclear ribonucleoprotein U OS=Mus musculus GN=Hnrnpu PE=1 SV=1                     | 0,679 |
| Q6ZWN5     | 40S ribosomal protein S9 OS=Mus musculus GN=Rps9 PE=1 SV=3                                        | 0,677 |
| Q6IFX2     | Keratin, type I cytoskeletal 42 OS=Mus musculus GN=Krt42 PE=1 SV=1                                | 0,667 |
| Q9WUM5     | Succinyl-CoA ligase [ADP/GDP-forming] subunit alpha, mitochondrial OS=Mus musculus GN=Suclg1 PE=1 | 0,663 |
| Q9R1P4     | Proteasome subunit alpha type-1 OS=Mus musculus GN=Psm1 PE=1 SV=1                                 | 0,662 |
| S4R249     | Ankyrin-2 OS=Mus musculus GN=Ank2 PE=1 SV=1                                                       | 0,66  |
| E9QAX2     | Unconventional myosin-XVIIIa OS=Mus musculus GN=Myo18a PE=1 SV=1                                  | 0,66  |
| Q9Z1B3     | 1-phosphatidylinositol 4,5-bisphosphate phosphodiesterase beta-1 OS=Mus musculus GN=Plcb1 PE=1    | 0,659 |
| Q548L4     | Glutamate decarboxylase OS=Mus musculus GN=Gad2 PE=2 SV=1                                         | 0,652 |
| P47915     | 60S ribosomal protein L29 OS=Mus musculus GN=Rpl29 PE=2 SV=2                                      | 0,646 |
| A2CEK3     | Phosphoglucomutase-2 OS=Mus musculus GN=Pgm2 PE=1 SV=1                                            | 0,646 |
| A0A0G2JGS4 | Calcium/calmodulin-dependent protein kinase type II subunit delta OS=Mus musculus GN=Camk2d PE=1  | 0,645 |
| P14115     | 60S ribosomal protein L27a OS=Mus musculus GN=Rpl27a PE=2 SV=5                                    | 0,641 |
| G5E866     | Splicing factor 3B subunit 1 OS=Mus musculus GN=Sf3b1 PE=1 SV=1                                   | 0,641 |
| O09061     | Proteasome subunit beta type-1 OS=Mus musculus GN=Psm1 PE=1 SV=1                                  | 0,641 |

|            |                                                                                                       |       |
|------------|-------------------------------------------------------------------------------------------------------|-------|
| Q5M9M5     | MCG10806 OS=Mus musculus GN=Rpl23a PE=2 SV=1                                                          | 0,639 |
| P11798     | Calcium/calmodulin-dependent protein kinase type II subunit alpha OS=Mus musculus GN=Camk2a PE=1 SV=1 | 0,633 |
| P11881     | Inositol 1,4,5-trisphosphate receptor type 1 OS=Mus musculus GN=Itpr1 PE=1 SV=2                       | 0,633 |
| Q99JB2     | Stomatin-like protein 2, mitochondrial OS=Mus musculus GN=Stoml2 PE=1 SV=1                            | 0,632 |
| Q99PV0     | Pre-mRNA-processing-splicing factor 8 OS=Mus musculus GN=Prpf8 PE=1 SV=2                              | 0,629 |
| Q91ZX7     | Prolow-density lipoprotein receptor-related protein 1 OS=Mus musculus GN=Lrp1 PE=1 SV=1               | 0,627 |
| P63318     | Protein kinase C gamma type OS=Mus musculus GN=Prkcg PE=1 SV=1                                        | 0,624 |
| S4R1P5     | Dystonin OS=Mus musculus GN=Dst PE=1 SV=1                                                             | 0,621 |
| Q8CCK0     | Core histone macro-H2A.2 OS=Mus musculus GN=H2afy2 PE=1 SV=3                                          | 0,619 |
| A0A0A0MQA5 | Tubulin alpha chain (Fragment) OS=Mus musculus GN=Tuba4a PE=1 SV=1                                    | 0,619 |
| B1AQZ0     | Septin-8 OS=Mus musculus GN=Sept8 PE=1 SV=1                                                           | 0,614 |
| Q5XJF6     | Ribosomal protein OS=Mus musculus GN=Rpl10a PE=1 SV=1                                                 | 0,611 |
| Q3UHL1     | CaM kinase-like vesicle-associated protein OS=Mus musculus GN=Camkv PE=1 SV=2                         | 0,609 |
| Q2PFD7     | PH and SEC7 domain-containing protein 3 OS=Mus musculus GN=Psd3 PE=1 SV=2                             | 0,609 |
| P62889     | 60S ribosomal protein L30 OS=Mus musculus GN=Rpl30 PE=1 SV=2                                          | 0,604 |
| P12970     | 60S ribosomal protein L7a OS=Mus musculus GN=Rpl7a PE=1 SV=2                                          | 0,597 |
| O08788     | Dynactin subunit 1 OS=Mus musculus GN=Dctn1 PE=1 SV=3                                                 | 0,592 |
| Q9WV92     | Band 4.1-like protein 3 OS=Mus musculus GN=Epb41l3 PE=1 SV=1                                          | 0,59  |
| P61514     | 60S ribosomal protein L37a OS=Mus musculus GN=Rpl37a PE=3 SV=2                                        | 0,584 |
| P03995     | Glial fibrillary acidic protein OS=Mus musculus GN=Gfap PE=1 SV=4                                     | 0,583 |
| E9Q0J5     | Kinesin-like protein KIF21A OS=Mus musculus GN=Kif21a PE=1 SV=2                                       | 0,582 |
| Q6DFW4     | Nucleolar protein 58 OS=Mus musculus GN=Nop58 PE=1 SV=1                                               | 0,582 |
| P27773     | Protein disulfide-isomerase A3 OS=Mus musculus GN=Pdia3 PE=1 SV=2                                     | 0,573 |
| P86048     | 60S ribosomal protein L10-like OS=Mus musculus GN=Rpl10l PE=2 SV=1                                    | 0,572 |
| Q9CPX4     | Ferritin OS=Mus musculus GN=Ftl1 PE=1 SV=1                                                            | 0,571 |
| P08551     | Neurofilament light polypeptide OS=Mus musculus GN=Nefl PE=1 SV=5                                     | 0,569 |
| Q0VF55     | Calcium-transporting ATPase OS=Mus musculus GN=Atp2b3 PE=1 SV=1                                       | 0,567 |
| P17426     | AP-2 complex subunit alpha-1 OS=Mus musculus GN=Ap2a1 PE=1 SV=1                                       | 0,566 |
| Q3UGC8     | Propionyl-Coenzyme A carboxylase, alpha polypeptide, isoform CRA_b OS=Mus musculus GN=Pcca PE=1 SV=1  | 0,566 |
| P19001     | Keratin, type I cytoskeletal 19 OS=Mus musculus GN=Krt19 PE=1 SV=1                                    | 0,565 |
| Q6ZWV7     | 60S ribosomal protein L35 OS=Mus musculus GN=Rpl35 PE=1 SV=1                                          | 0,563 |
| Q3TYV5     | Cyclic nucleotide phosphodiesterase 1, isoform CRA_b OS=Mus musculus GN=Cnp PE=2 SV=1                 | 0,559 |
| P62996     | Transformer-2 protein homolog beta OS=Mus musculus GN=Tra2b PE=1 SV=1                                 | 0,557 |



|            |                                                                                                 |       |
|------------|-------------------------------------------------------------------------------------------------|-------|
| Q3TVK3     | Aspartyl aminopeptidase OS=Mus musculus GN=Dnpep PE=1 SV=1                                      | 0,555 |
| Q3TLP8     | RAS-related C3 botulinum substrate 1, isoform CRA_a OS=Mus musculus GN=Rac1 PE=1 SV=1           | 0,552 |
| D0VYV6     | Erythrocyte protein band 4.1-like 3 isoform B OS=Mus musculus GN=Epb4.1I3 PE=2 SV=1             | 0,532 |
| Q545X8     | 40S ribosomal protein S4 OS=Mus musculus GN=Rps4x PE=2 SV=1                                     | 0,527 |
| Q9R1T4     | Septin-6 OS=Mus musculus GN=Sept6 PE=1 SV=4                                                     | 0,526 |
| P60879     | Synaptosomal-associated protein 25 OS=Mus musculus GN=Snap25 PE=1 SV=1                          | 0,525 |
| Q9QWI6     | SRC kinase signaling inhibitor 1 OS=Mus musculus GN=Srcin1 PE=1 SV=2                            | 0,522 |
| P62264     | 40S ribosomal protein S14 OS=Mus musculus GN=Rps14 PE=1 SV=3                                    | 0,521 |
| Q9QXS1     | Plectin OS=Mus musculus GN=Plec PE=1 SV=3                                                       | 0,521 |
| P47911     | 60S ribosomal protein L6 OS=Mus musculus GN=Rpl6 PE=1 SV=3                                      | 0,52  |
| P63085     | Mitogen-activated protein kinase 1 OS=Mus musculus GN=Mapk1 PE=1 SV=3                           | 0,516 |
| Q3UH59     | Myosin-10 OS=Mus musculus GN=Myh10 PE=1 SV=1                                                    | 0,514 |
| Q9QUM9     | Proteasome subunit alpha type-6 OS=Mus musculus GN=Psm6 PE=1 SV=1                               | 0,514 |
| O08599     | Syntaxin-binding protein 1 OS=Mus musculus GN=Stxbp1 PE=1 SV=2                                  | 0,513 |
| Q9Z2U1     | Proteasome subunit alpha type-5 OS=Mus musculus GN=Psm5 PE=1 SV=1                               | 0,507 |
| P19246     | Neurofilament heavy polypeptide OS=Mus musculus GN=Nefh PE=1 SV=3                               | 0,505 |
| O09167     | 60S ribosomal protein L21 OS=Mus musculus GN=Rpl21 PE=1 SV=3                                    | 0,504 |
| Q8VDD5     | Myosin-9 OS=Mus musculus GN=Myh9 PE=1 SV=4                                                      | 0,498 |
| E9QAZ2     | Ribosomal protein L15 OS=Mus musculus GN=Gm10020 PE=3 SV=1                                      | 0,497 |
| Q3TI05     | Chaperonin containing Tcp1, subunit 6a (Zeta) OS=Mus musculus GN=Cct6a PE=2 SV=1                | 0,491 |
| A0A140T8K6 | 60S ribosomal protein L36 OS=Mus musculus GN=Rpl36-ps3 PE=3 SV=1                                | 0,49  |
| P99026     | Proteasome subunit beta type-4 OS=Mus musculus GN=Psm4 PE=1 SV=1                                | 0,49  |
| P27659     | 60S ribosomal protein L3 OS=Mus musculus GN=Rpl3 PE=1 SV=3                                      | 0,485 |
| P31938     | Dual specificity mitogen-activated protein kinase kinase 1 OS=Mus musculus GN=Map2k1 PE=1 SV=2  | 0,484 |
| P53395     | Lipoamide acyltransferase component of branched-chain alpha-keto acid dehydrogenase complex, mi | 0,477 |
| Q9JHU4     | Cytoplasmic dynein 1 heavy chain 1 OS=Mus musculus GN=Dync1h1 PE=1 SV=2                         | 0,475 |
| Q8C522     | Endonuclease domain-containing 1 protein OS=Mus musculus GN=Endod1 PE=1 SV=2                    | 0,474 |
| O70318     | Band 4.1-like protein 2 OS=Mus musculus GN=Epb41I2 PE=1 SV=2                                    | 0,474 |
| P47962     | 60S ribosomal protein L5 OS=Mus musculus GN=Rpl5 PE=1 SV=3                                      | 0,471 |
| E9Q401     | Ryanodine receptor 2 OS=Mus musculus GN=Ryr2 PE=1 SV=1                                          | 0,466 |
| Q5I0T8     | Ribosomal protein L19 OS=Mus musculus GN=Rpl19 PE=2 SV=1                                        | 0,447 |
| Q9Z2U0     | Proteasome subunit alpha type-7 OS=Mus musculus GN=Psm7 PE=1 SV=1                               | 0,441 |
| Q5BLK0     | MCG18564, isoform CRA_a OS=Mus musculus GN=Rpl12 PE=2 SV=1                                      | 0,44  |

|        |                                                                                               |       |
|--------|-----------------------------------------------------------------------------------------------|-------|
| P62911 | 60S ribosomal protein L32 OS=Mus musculus GN=Rpl32 PE=1 SV=2                                  | 0,439 |
| E9PYK3 | Poly [ADP-ribose] polymerase OS=Mus musculus GN=Parp4 PE=1 SV=1                               | 0,439 |
| Q4VAG4 | MCG12304 OS=Mus musculus GN=Rpl22 PE=2 SV=1                                                   | 0,439 |
| P12023 | Amyloid beta A4 protein OS=Mus musculus GN=App PE=1 SV=3                                      | 0,432 |
| Q9D8B3 | Charged multivesicular body protein 4b OS=Mus musculus GN=Chmp4b PE=1 SV=2                    | 0,431 |
| P49722 | Proteasome subunit alpha type-2 OS=Mus musculus GN=Psm2 PE=1 SV=3                             | 0,425 |
| Q9CZY3 | Ubiquitin-conjugating enzyme E2 variant 1 OS=Mus musculus GN=Ube2v1 PE=1 SV=1                 | 0,423 |
| Q9D0M3 | Cytochrome c1, heme protein, mitochondrial OS=Mus musculus GN=Cyc1 PE=1 SV=1                  | 0,421 |
| Q9R1P3 | Proteasome subunit beta type-2 OS=Mus musculus GN=Psm2 PE=1 SV=1                              | 0,419 |
| Q58EW0 | 60S ribosomal protein L18 OS=Mus musculus GN=Rpl18 PE=2 SV=1                                  | 0,416 |
| Q9Z0H4 | CUGBP Elav-like family member 2 OS=Mus musculus GN=Celf2 PE=1 SV=1                            | 0,416 |
| Q5BLJ9 | 60S ribosomal protein L27 OS=Mus musculus GN=Rpl27 PE=2 SV=1                                  | 0,414 |
| Q497E9 | 40S ribosomal protein S8 OS=Mus musculus GN=Rps8 PE=2 SV=1                                    | 0,412 |
| Q80YX1 | Tenascin OS=Mus musculus GN=Tnc PE=1 SV=1                                                     | 0,412 |
| Q5BLK1 | 40S ribosomal protein S6 OS=Mus musculus GN=Rps6 PE=2 SV=1                                    | 0,411 |
| Z4YL23 | Fer-1-like protein 4 OS=Mus musculus GN=Fer14 PE=4 SV=1                                       | 0,399 |
| Q923T9 | Calcium/calmodulin-dependent protein kinase type II subunit gamma OS=Mus musculus GN=Camk2g   | 0,399 |
| O08917 | Flotillin-1 OS=Mus musculus GN=Flot1 PE=1 SV=1                                                | 0,399 |
| Q91VE0 | Long-chain fatty acid transport protein 4 OS=Mus musculus GN=Slc27a4 PE=1 SV=1                | 0,392 |
| Q505A8 | MCG17585 OS=Mus musculus GN=Rpl39 PE=2 SV=1                                                   | 0,389 |
| P46660 | Alpha-internexin OS=Mus musculus GN=Ina PE=1 SV=3                                             | 0,389 |
| Q5SVJ0 | Calcium/calmodulin-dependent protein kinase II, beta, isoform CRA_b OS=Mus musculus GN=Camk2b | 0,386 |
| P62267 | 40S ribosomal protein S23 OS=Mus musculus GN=Rps23 PE=1 SV=3                                  | 0,383 |
| P29341 | Polyadenylate-binding protein 1 OS=Mus musculus GN=Pabpc1 PE=1 SV=2                           | 0,38  |
| P08553 | Neurofilament medium polypeptide OS=Mus musculus GN=Nefm PE=1 SV=4                            | 0,377 |
| Q9CU62 | Structural maintenance of chromosomes protein 1A OS=Mus musculus GN=Smc1a PE=1 SV=4           | 0,376 |
| O55234 | Proteasome subunit beta type-5 OS=Mus musculus GN=Psm5 PE=1 SV=3                              | 0,376 |
| P17427 | AP-2 complex subunit alpha-2 OS=Mus musculus GN=Ap2a2 PE=1 SV=2                               | 0,371 |
| Q9D1R9 | 60S ribosomal protein L34 OS=Mus musculus GN=Rpl34 PE=1 SV=2                                  | 0,37  |
| P09528 | Ferritin heavy chain OS=Mus musculus GN=Fth1 PE=1 SV=2                                        | 0,369 |
| Q564E8 | Ribosomal protein L4 OS=Mus musculus GN=Rpl4 PE=2 SV=1                                        | 0,367 |
| P14685 | 26S proteasome non-ATPase regulatory subunit 3 OS=Mus musculus GN=Psm3 PE=1 SV=3              | 0,367 |
| Q8BKZ9 | Pyruvate dehydrogenase protein X component, mitochondrial OS=Mus musculus GN=Pdhx PE=1 SV=1   | 0,362 |

|        |                                                                                                    |       |
|--------|----------------------------------------------------------------------------------------------------|-------|
| P32067 | Lupus La protein homolog OS=Mus musculus GN=Ssb PE=1 SV=1                                          | 0,358 |
| Q58EV4 | Proteasome subunit alpha type OS=Mus musculus GN=Psm3 PE=2 SV=1                                    | 0,353 |
| Q8BMF4 | Dihydropyridyllysine-residue acetyltransferase component of pyruvate dehydrogenase complex, mitocl | 0,345 |
| P62715 | Serine/threonine-protein phosphatase 2A catalytic subunit beta isoform OS=Mus musculus GN=Ppp2c    | 0,344 |
| Q99104 | Unconventional myosin-Va OS=Mus musculus GN=Myo5a PE=1 SV=2                                        | 0,337 |
| F6TYB7 | Myelin basic protein (Fragment) OS=Mus musculus GN=Mbp PE=1 SV=1                                   | 0,334 |
| Q9JLM8 | Serine/threonine-protein kinase DCLK1 OS=Mus musculus GN=Dclk1 PE=1 SV=1                           | 0,321 |
| P62855 | 40S ribosomal protein S26 OS=Mus musculus GN=Rps26 PE=1 SV=3                                       | 0,316 |
| Q9CR57 | 60S ribosomal protein L14 OS=Mus musculus GN=Rpl14 PE=1 SV=3                                       | 0,313 |
| P70195 | Proteasome subunit beta type-7 OS=Mus musculus GN=Psm7 PE=1 SV=1                                   | 0,31  |
| Q9D823 | 60S ribosomal protein L37 OS=Mus musculus GN=Rpl37 PE=3 SV=3                                       | 0,305 |
| Q9EQK5 | Major vault protein OS=Mus musculus GN=Mvp PE=1 SV=4                                               | 0,292 |
| Q5SQX6 | Cytoplasmic FMR1-interacting protein 2 OS=Mus musculus GN=Cyfp2 PE=1 SV=2                          | 0,291 |
| V9GX76 | Unconventional myosin-VI OS=Mus musculus GN=Myo6 PE=1 SV=1                                         | 0,285 |
| P97499 | Telomerase protein component 1 OS=Mus musculus GN=Tep1 PE=1 SV=1                                   | 0,273 |
| Q9JMJ3 | ADP-ribosylation factor-like protein 6-interacting protein 4 OS=Mus musculus GN=Arl6ip4 PE=1 SV=1  | 0,251 |
| Q5SS83 | Flotillin 2, isoform CRA_a OS=Mus musculus GN=Flot2 PE=1 SV=1                                      | 0,25  |
| P62918 | 60S ribosomal protein L8 OS=Mus musculus GN=Rpl8 PE=1 SV=2                                         | 0,244 |
| P63163 | Small nuclear ribonucleoprotein-associated protein N OS=Mus musculus GN=Snrpn PE=2 SV=1            | 0,241 |
| Q8R366 | Immunoglobulin superfamily member 8 OS=Mus musculus GN=Igsf8 PE=1 SV=2                             | 0,234 |
| Q8CAK3 | UPF0515 protein C19orf66 homolog OS=Mus musculus PE=2 SV=1                                         | 0,229 |
| Q9CYR0 | Single-stranded DNA-binding protein, mitochondrial OS=Mus musculus GN=Ssbp1 PE=1 SV=1              | 0,205 |
| P62320 | Small nuclear ribonucleoprotein Sm D3 OS=Mus musculus GN=Snrpd3 PE=1 SV=1                          | 0,204 |
| P62315 | Small nuclear ribonucleoprotein Sm D1 OS=Mus musculus GN=Snrpd1 PE=1 SV=1                          | 0,203 |
| P62717 | 60S ribosomal protein L18a OS=Mus musculus GN=Rpl18a PE=1 SV=1                                     | 0,193 |
| Q99MN9 | Propionyl-CoA carboxylase beta chain, mitochondrial OS=Mus musculus GN=Pccb PE=1 SV=2              | 0,187 |
| Q3V0Q1 | Dynein heavy chain 12, axonemal OS=Mus musculus GN=Dnah12 PE=1 SV=2                                | 0,149 |
| P62307 | Small nuclear ribonucleoprotein F OS=Mus musculus GN=Snrpf PE=1 SV=1                               | 0,146 |
| Q8C1Y8 | Vacuolar fusion protein CCZ1 homolog OS=Mus musculus GN=Ccz1 PE=1 SV=1                             | 0,126 |

**DATA FILE S1**  
**REGULATED PROTEINS AD vs. non-AD**

| Accession  | Description                                                                                     | Abundance Ratio: (AD) / (non-AD) |
|------------|-------------------------------------------------------------------------------------------------|----------------------------------|
| P10636-6   | Isoform of P10636, Isoform Tau-D of Microtubule-associated protein tau OS=Homo sapiens GN=MAPT  | 60,425                           |
| P10636-4   | Isoform of P10636, Isoform Tau-B of Microtubule-associated protein tau OS=Homo sapiens GN=MAPT  | 43,146                           |
| A0A0G2JMX7 | Microtubule-associated protein OS=Homo sapiens GN=MAPT PE=1 SV=1                                | 37,151                           |
| P62979     | Ubiquitin-40S ribosomal protein S27a OS=Homo sapiens GN=RPS27A PE=1 SV=2                        | 8,079                            |
| Q13867     | Bleomycin hydrolase OS=Homo sapiens GN=BLMH PE=1 SV=1                                           | 7,447                            |
| Q7Z7K6     | Centromere protein V OS=Homo sapiens GN=CENPV PE=1 SV=1                                         | 5,332                            |
| P63244     | Receptor of activated protein C kinase 1 OS=Homo sapiens GN=RACK1 PE=1 SV=3                     | 4,905                            |
| P08670     | Vimentin OS=Homo sapiens GN=VIM PE=1 SV=4                                                       | 4,749                            |
| Q99747     | Gamma-soluble NSF attachment protein OS=Homo sapiens GN=NAPG PE=1 SV=1                          | 4,461                            |
| A0A087WV75 | Isoform of P13591, Neural cell adhesion molecule 1 OS=Homo sapiens GN=NCAM1 PE=1 SV=1           | 4,26                             |
| P11182     | Lipoamide acyltransferase component of branched-chain alpha-keto acid dehydrogenase complex, mi | 3,851                            |
| B7Z6Z4     | Isoform of P60660, Myosin light polypeptide 6 OS=Homo sapiens GN=MYL6 PE=1 SV=1                 | 3,766                            |
| Q9UBB6     | Neurochondrin OS=Homo sapiens GN=NCDN PE=1 SV=1                                                 | 3,646                            |
| A0A087X165 | Isoform of Q9C0H9, SRC kinase-signaling inhibitor 1 OS=Homo sapiens GN=SRCIN1 PE=1 SV=1         | 3,564                            |
| P05067     | Amyloid beta A4 protein OS=Homo sapiens GN=APP PE=1 SV=3                                        | 2,998                            |
| P61927     | 60S ribosomal protein L37 OS=Homo sapiens GN=RPL37 PE=1 SV=2                                    | 2,831                            |
| Q01813     | ATP-dependent 6-phosphofructokinase, platelet type OS=Homo sapiens GN=PFKP PE=1 SV=2            | 2,762                            |
| Q13509     | Tubulin beta-3 chain OS=Homo sapiens GN=TUBB3 PE=1 SV=2                                         | 2,732                            |
| P11021     | 78 kDa glucose-regulated protein OS=Homo sapiens GN=HSPA5 PE=1 SV=2                             | 2,656                            |
| P0DME0     | Protein SETSIP OS=Homo sapiens GN=SETSIP PE=1 SV=1                                              | 2,477                            |
| G8JLB6     | Heterogeneous nuclear ribonucleoprotein H OS=Homo sapiens GN=HNRNPH1 PE=1 SV=1                  | 2,471                            |
| P02144     | Myoglobin OS=Homo sapiens GN=MB PE=1 SV=2                                                       | 2,414                            |
| P30044     | Peroxiredoxin-5, mitochondrial OS=Homo sapiens GN=PRDX5 PE=1 SV=4                               | 2,327                            |
| P52306     | Rap1 GTPase-GDP dissociation stimulator 1 OS=Homo sapiens GN=RAP1GDS1 PE=1 SV=3                 | 2,291                            |
| P19338     | Nucleolin OS=Homo sapiens GN=NCL PE=1 SV=3                                                      | 1,952                            |
| P62888     | 60S ribosomal protein L30 OS=Homo sapiens GN=RPL30 PE=1 SV=2                                    | 1,935                            |
| P0C0S5     | Histone H2A.Z OS=Homo sapiens GN=H2AFZ PE=1 SV=2                                                | 1,784                            |
| Q00839     | Heterogeneous nuclear ribonucleoprotein U OS=Homo sapiens GN=HNRNPU PE=1 SV=6                   | 1,71                             |
| Q9UQ80     | Proliferation-associated protein 2G4 OS=Homo sapiens GN=PA2G4 PE=1 SV=3                         | 1,702                            |

|            |                                                                                                 |       |
|------------|-------------------------------------------------------------------------------------------------|-------|
| P50990     | T-complex protein 1 subunit theta OS=Homo sapiens GN=CCT8 PE=1 SV=4                             | 1,702 |
| P61513     | 60S ribosomal protein L37a OS=Homo sapiens GN=RPL37A PE=1 SV=2                                  | 1,693 |
| P62266     | 40S ribosomal protein S23 OS=Homo sapiens GN=RPS23 PE=1 SV=3                                    | 1,689 |
| P02792     | Ferritin light chain OS=Homo sapiens GN=FTL PE=1 SV=2                                           | 1,674 |
| Q13243     | Serine/arginine-rich splicing factor 5 OS=Homo sapiens GN=SRSF5 PE=1 SV=1                       | 1,643 |
| Q07954     | Prolow-density lipoprotein receptor-related protein 1 OS=Homo sapiens GN=LRP1 PE=1 SV=2         | 1,633 |
| P07737     | Profilin-1 OS=Homo sapiens GN=PFN1 PE=1 SV=2                                                    | 1,567 |
| P62318     | Small nuclear ribonucleoprotein Sm D3 OS=Homo sapiens GN=SNRPD3 PE=1 SV=1                       | 1,522 |
| P15531     | Nucleoside diphosphate kinase A OS=Homo sapiens GN=NME1 PE=1 SV=1                               | 1,504 |
| Q9NQ66     | 1-phosphatidylinositol 4,5-bisphosphate phosphodiesterase beta-1 OS=Homo sapiens GN=PLCB1 PE=:  | 1,499 |
| P39019     | 40S ribosomal protein S19 OS=Homo sapiens GN=RPS19 PE=1 SV=2                                    | 1,495 |
| P04899     | Guanine nucleotide-binding protein G(i) subunit alpha-2 OS=Homo sapiens GN=GNAI2 PE=1 SV=3      | 1,493 |
| A0A0J9YXJ0 | Isoform of O95319, CUGBP Elav-like family member 2 OS=Homo sapiens GN=CELF2 PE=1 SV=1           | 1,488 |
| H0YKD8     | Isoform of P46779, 60S ribosomal protein L28 OS=Homo sapiens GN=RPL28 PE=1 SV=1                 | 1,469 |
| P06454     | Prothymosin alpha OS=Homo sapiens GN=PTMA PE=1 SV=2                                             | 1,456 |
| P31146     | Coronin-1A OS=Homo sapiens GN=CORO1A PE=1 SV=4                                                  | 1,451 |
| O00499     | Myc box-dependent-interacting protein 1 OS=Homo sapiens GN=BIN1 PE=1 SV=1                       | 1,439 |
| A0A075B767 | Peptidyl-prolyl cis-trans isomerase OS=Homo sapiens GN=LOC105371242 PE=3 SV=1                   | 1,439 |
| P21291     | Cysteine and glycine-rich protein 1 OS=Homo sapiens GN=CSRP1 PE=1 SV=3                          | 1,437 |
| Q01484     | Ankyrin-2 OS=Homo sapiens GN=ANK2 PE=1 SV=4                                                     | 1,429 |
| O60636     | Tetraspanin-2 OS=Homo sapiens GN=TSPAN2 PE=1 SV=2                                               | 1,427 |
| P78386     | Keratin, type II cuticular Hb5 OS=Homo sapiens GN=KRT85 PE=1 SV=1                               | 1,404 |
| P14678     | Small nuclear ribonucleoprotein-associated proteins B and B' OS=Homo sapiens GN=SNRPB PE=1 SV=: | 1,403 |
| P39023     | 60S ribosomal protein L3 OS=Homo sapiens GN=RPL3 PE=1 SV=2                                      | 1,389 |
| U3KQK0     | Isoform of Q99877, Histone H2B OS=Homo sapiens GN=HIST1H2BN PE=1 SV=1                           | 1,376 |
| P18621-3   | Isoform of P18621, Isoform 3 of 60S ribosomal protein L17 OS=Homo sapiens GN=RPL17              | 1,375 |
| Q9UQ35     | Serine/arginine repetitive matrix protein 2 OS=Homo sapiens GN=SRRM2 PE=1 SV=2                  | 1,366 |
| Q9ULV4     | Coronin-1C OS=Homo sapiens GN=CORO1C PE=1 SV=1                                                  | 1,36  |
| Q92599     | Septin-8 OS=Homo sapiens GN=SEPT8 PE=1 SV=4                                                     | 1,359 |
| P53396     | ATP-citrate synthase OS=Homo sapiens GN=ACLY PE=1 SV=3                                          | 1,344 |
| P61254     | 60S ribosomal protein L26 OS=Homo sapiens GN=RPL26 PE=1 SV=1                                    | 1,343 |
| P51991     | Heterogeneous nuclear ribonucleoprotein A3 OS=Homo sapiens GN=HNRNPA3 PE=1 SV=2                 | 1,332 |
| P35080     | Profilin-2 OS=Homo sapiens GN=PFN2 PE=1 SV=3                                                    | 0,774 |

|            |                                                                                                  |       |
|------------|--------------------------------------------------------------------------------------------------|-------|
| P55072     | Transitional endoplasmic reticulum ATPase OS=Homo sapiens GN=VCP PE=1 SV=4                       | 0,771 |
| P62195     | 26S protease regulatory subunit 8 OS=Homo sapiens GN=PSMC5 PE=1 SV=1                             | 0,767 |
| P48426     | Phosphatidylinositol 5-phosphate 4-kinase type-2 alpha OS=Homo sapiens GN=PIP4K2A PE=1 SV=2      | 0,755 |
| P12277     | Creatine kinase B-type OS=Homo sapiens GN=CKB PE=1 SV=1                                          | 0,751 |
| P14625     | Endoplasmic reticulum chaperone protein OS=Homo sapiens GN=HSP90B1 PE=1 SV=1                     | 0,748 |
| A0A0U1RRH7 | Histone H2A OS=Homo sapiens PE=3 SV=1                                                            | 0,746 |
| Q86YZ3     | Hornerin OS=Homo sapiens GN=HRNR PE=1 SV=2                                                       | 0,746 |
| P16615     | Sarcoplasmic/endoplasmic reticulum calcium ATPase 2 OS=Homo sapiens GN=ATP2A2 PE=1 SV=1          | 0,738 |
| A0A087WUS0 | 40S ribosomal protein S24 OS=Homo sapiens GN=RPS24 PE=1 SV=1                                     | 0,734 |
| P53597     | Succinate--CoA ligase [ADP/GDP-forming] subunit alpha, mitochondrial OS=Homo sapiens GN=SUCLG:   | 0,733 |
| P00558     | Phosphoglycerate kinase 1 OS=Homo sapiens GN=PGK1 PE=1 SV=3                                      | 0,733 |
| P35219     | Carbonic anhydrase-related protein OS=Homo sapiens GN=CA8 PE=1 SV=3                              | 0,731 |
| P63151     | Serine/threonine-protein phosphatase 2A 55 kDa regulatory subunit B alpha isoform OS=Homo sapien | 0,729 |
| Q08554     | Desmocollin-1 OS=Homo sapiens GN=DSC1 PE=1 SV=2                                                  | 0,725 |
| P17600     | Synapsin-1 OS=Homo sapiens GN=SYN1 PE=1 SV=3                                                     | 0,719 |
| Q15366     | Poly(rC)-binding protein 2 OS=Homo sapiens GN=PCBP2 PE=1 SV=1                                    | 0,719 |
| P08621     | U1 small nuclear ribonucleoprotein 70 kDa OS=Homo sapiens GN=SNRNP70 PE=1 SV=2                   | 0,716 |
| P23528     | Cofilin-1 OS=Homo sapiens GN=CFL1 PE=1 SV=3                                                      | 0,714 |
| P60709     | Actin, cytoplasmic 1 OS=Homo sapiens GN=ACTB PE=1 SV=1                                           | 0,709 |
| P13797     | Plastin-3 OS=Homo sapiens GN=PLS3 PE=1 SV=4                                                      | 0,707 |
| P62937     | Peptidyl-prolyl cis-trans isomerase A OS=Homo sapiens GN=PPIA PE=1 SV=2                          | 0,707 |
| P61764     | Syntaxin-binding protein 1 OS=Homo sapiens GN=STXBP1 PE=1 SV=1                                   | 0,703 |
| Q16143     | Beta-synuclein OS=Homo sapiens GN=SNCB PE=1 SV=1                                                 | 0,701 |
| Q8TAC9     | Secretory carrier-associated membrane protein 5 OS=Homo sapiens GN=SCAMP5 PE=1 SV=1              | 0,698 |
| Q5JXB2     | Putative ubiquitin-conjugating enzyme E2 N-like OS=Homo sapiens GN=UBE2NL PE=1 SV=1              | 0,692 |
| P40925     | Malate dehydrogenase, cytoplasmic OS=Homo sapiens GN=MDH1 PE=1 SV=4                              | 0,692 |
| P20336     | Ras-related protein Rab-3A OS=Homo sapiens GN=RAB3A PE=1 SV=1                                    | 0,691 |
| P40227     | T-complex protein 1 subunit zeta OS=Homo sapiens GN=CCT6A PE=1 SV=3                              | 0,691 |
| Q16629     | Serine/arginine-rich splicing factor 7 OS=Homo sapiens GN=SRSF7 PE=1 SV=1                        | 0,687 |
| P11766     | Alcohol dehydrogenase class-3 OS=Homo sapiens GN=ADH5 PE=1 SV=4                                  | 0,683 |
| P05771     | Protein kinase C beta type OS=Homo sapiens GN=PRKCB PE=1 SV=4                                    | 0,68  |
| P07900     | Heat shock protein HSP 90-alpha OS=Homo sapiens GN=HSP90AA1 PE=1 SV=5                            | 0,679 |
| Q9Y2J2     | Band 4.1-like protein 3 OS=Homo sapiens GN=EPB41L3 PE=1 SV=2                                     | 0,678 |

|            |                                                                                            |       |
|------------|--------------------------------------------------------------------------------------------|-------|
| Q04837     | Single-stranded DNA-binding protein, mitochondrial OS=Homo sapiens GN=SSBP1 PE=1 SV=1      | 0,674 |
| P06576     | ATP synthase subunit beta, mitochondrial OS=Homo sapiens GN=ATP5B PE=1 SV=3                | 0,674 |
| Q8NCB2     | CaM kinase-like vesicle-associated protein OS=Homo sapiens GN=CAMKV PE=2 SV=2              | 0,672 |
| Q02413     | Desmoglein-1 OS=Homo sapiens GN=DSG1 PE=1 SV=2                                             | 0,671 |
| Q14982     | Opioid-binding protein/cell adhesion molecule OS=Homo sapiens GN=OPCML PE=1 SV=1           | 0,671 |
| P21579     | Synaptotagmin-1 OS=Homo sapiens GN=SYT1 PE=1 SV=1                                          | 0,669 |
| P19367     | Hexokinase-1 OS=Homo sapiens GN=HK1 PE=1 SV=3                                              | 0,667 |
| P10412     | Histone H1.4 OS=Homo sapiens GN=HIST1H1E PE=1 SV=2                                         | 0,666 |
| P02768     | Serum albumin OS=Homo sapiens GN=ALB PE=1 SV=2                                             | 0,665 |
| P18669     | Phosphoglycerate mutase 1 OS=Homo sapiens GN=PGAM1 PE=1 SV=2                               | 0,663 |
| Q05639     | Elongation factor 1-alpha 2 OS=Homo sapiens GN=EEF1A2 PE=1 SV=1                            | 0,662 |
| Q7Z4S6     | Kinesin-like protein KIF21A OS=Homo sapiens GN=KIF21A PE=1 SV=2                            | 0,662 |
| P18124     | 60S ribosomal protein L7 OS=Homo sapiens GN=RPL7 PE=1 SV=1                                 | 0,661 |
| P61981     | 14-3-3 protein gamma OS=Homo sapiens GN=YWHAG PE=1 SV=2                                    | 0,655 |
| Q92598     | Heat shock protein 105 kDa OS=Homo sapiens GN=HSPH1 PE=1 SV=1                              | 0,655 |
| Q9UJZ1     | Stomatin-like protein 2, mitochondrial OS=Homo sapiens GN=STOML2 PE=1 SV=1                 | 0,654 |
| A0A1B0GTW6 | Isoform of Q9H4G0, Band 4.1-like protein 1 (Fragment) OS=Homo sapiens GN=EPB41L1 PE=1 SV=1 | 0,65  |
| P17858     | ATP-dependent 6-phosphofructokinase, liver type OS=Homo sapiens GN=PFKL PE=1 SV=6          | 0,65  |
| P49720     | Proteasome subunit beta type-3 OS=Homo sapiens GN=PSMB3 PE=1 SV=2                          | 0,648 |
| P46777     | 60S ribosomal protein L5 OS=Homo sapiens GN=RPL5 PE=1 SV=3                                 | 0,641 |
| Q14141     | Septin-6 OS=Homo sapiens GN=SEPT6 PE=1 SV=4                                                | 0,639 |
| O15075     | Serine/threonine-protein kinase DCLK1 OS=Homo sapiens GN=DCLK1 PE=1 SV=2                   | 0,631 |
| E7EQ64     | Isoform of P07477, Trypsin-1 OS=Homo sapiens GN=PRSS1 PE=1 SV=1                            | 0,63  |
| Q9Y277     | Voltage-dependent anion-selective channel protein 3 OS=Homo sapiens GN=VDAC3 PE=1 SV=1     | 0,628 |
| H3BR70     | Isoform of P14618, Pyruvate kinase OS=Homo sapiens GN=PKM PE=1 SV=1                        | 0,627 |
| P35908     | Keratin, type II cytoskeletal 2 epidermal OS=Homo sapiens GN=KRT2 PE=1 SV=2                | 0,625 |
| Q15773     | Myeloid leukemia factor 2 OS=Homo sapiens GN=MLF2 PE=1 SV=1                                | 0,623 |
| A0A0B4J2C3 | Translationally-controlled tumor protein OS=Homo sapiens GN=TPT1 PE=1 SV=1                 | 0,622 |
| Q6ZN40     | Tropomyosin 1 (Alpha), isoform CRA_f OS=Homo sapiens GN=TPM1 PE=1 SV=1                     | 0,621 |
| Q6PUV4     | Complexin-2 OS=Homo sapiens GN=CPLX2 PE=2 SV=2                                             | 0,621 |
| P60201     | Myelin proteolipid protein OS=Homo sapiens GN=PLP1 PE=1 SV=2                               | 0,614 |
| Q15365     | Poly(rC)-binding protein 1 OS=Homo sapiens GN=PCBP1 PE=1 SV=2                              | 0,612 |
| P28070     | Proteasome subunit beta type-4 OS=Homo sapiens GN=PSMB4 PE=1 SV=4                          | 0,61  |

|            |                                                                                             |       |
|------------|---------------------------------------------------------------------------------------------|-------|
| A0A024RA52 | Proteasome subunit alpha type OS=Homo sapiens GN=PSMA2 PE=1 SV=1                            | 0,61  |
| P13929     | Beta-enolase OS=Homo sapiens GN=ENO3 PE=1 SV=5                                              | 0,609 |
| O14818     | Proteasome subunit alpha type-7 OS=Homo sapiens GN=PSMA7 PE=1 SV=1                          | 0,607 |
| P62316     | Small nuclear ribonucleoprotein Sm D2 OS=Homo sapiens GN=SNRPD2 PE=1 SV=1                   | 0,606 |
| P07195     | L-lactate dehydrogenase B chain OS=Homo sapiens GN=LDHB PE=1 SV=2                           | 0,603 |
| Q14683     | Structural maintenance of chromosomes protein 1A OS=Homo sapiens GN=SMC1A PE=1 SV=2         | 0,602 |
| P13647     | Keratin, type II cytoskeletal 5 OS=Homo sapiens GN=KRT5 PE=1 SV=3                           | 0,601 |
| P28066     | Proteasome subunit alpha type-5 OS=Homo sapiens GN=PSMA5 PE=1 SV=3                          | 0,6   |
| P09471     | Guanine nucleotide-binding protein G(o) subunit alpha OS=Homo sapiens GN=GNAO1 PE=1 SV=4    | 0,6   |
| P58546     | Myotrophin OS=Homo sapiens GN=MTPN PE=1 SV=2                                                | 0,598 |
| Q92752     | Tenascin-R OS=Homo sapiens GN=TNR PE=1 SV=3                                                 | 0,596 |
| P13645     | Keratin, type I cytoskeletal 10 OS=Homo sapiens GN=KRT10 PE=1 SV=6                          | 0,594 |
| P20930     | Filaggrin OS=Homo sapiens GN=FLG PE=1 SV=3                                                  | 0,593 |
| Q9BPU6     | Dihydropyrimidinase-related protein 5 OS=Homo sapiens GN=DPYSL5 PE=1 SV=1                   | 0,592 |
| P62750     | 60S ribosomal protein L23a OS=Homo sapiens GN=RPL23A PE=1 SV=1                              | 0,59  |
| P51149     | Ras-related protein Rab-7a OS=Homo sapiens GN=RAB7A PE=1 SV=1                               | 0,588 |
| Q9Y639     | Neuroplastin OS=Homo sapiens GN=NPTN PE=1 SV=2                                              | 0,587 |
| P02538     | Keratin, type II cytoskeletal 6A OS=Homo sapiens GN=KRT6A PE=1 SV=3                         | 0,586 |
| O00330     | Pyruvate dehydrogenase protein X component, mitochondrial OS=Homo sapiens GN=PDHX PE=1 SV=: | 0,585 |
| P50395     | Rab GDP dissociation inhibitor beta OS=Homo sapiens GN=GDI2 PE=1 SV=2                       | 0,579 |
| P07910     | Heterogeneous nuclear ribonucleoproteins C1/C2 OS=Homo sapiens GN=HNRNPC PE=1 SV=4          | 0,578 |
| P21796     | Voltage-dependent anion-selective channel protein 1 OS=Homo sapiens GN=VDAC1 PE=1 SV=2      | 0,575 |
| E7EMK3     | Isoform of Q14254, Flotillin-2 OS=Homo sapiens GN=FLOT2 PE=1 SV=1                           | 0,575 |
| P25705     | ATP synthase subunit alpha, mitochondrial OS=Homo sapiens GN=ATP5A1 PE=1 SV=1               | 0,574 |
| F5GYJ8     | Isoform of Q96FW1, Ubiquitin thioesterase OTUB1 OS=Homo sapiens GN=OTUB1 PE=1 SV=1          | 0,57  |
| P07437     | Tubulin beta chain OS=Homo sapiens GN=TUBB PE=1 SV=2                                        | 0,569 |
| P05388     | 60S acidic ribosomal protein P0 OS=Homo sapiens GN=RPLP0 PE=1 SV=1                          | 0,569 |
| P22676     | Calretinin OS=Homo sapiens GN=CALB2 PE=2 SV=2                                               | 0,569 |
| P07305     | Histone H1.0 OS=Homo sapiens GN=H1F0 PE=1 SV=3                                              | 0,565 |
| O76013     | Keratin, type I cuticular Ha6 OS=Homo sapiens GN=KRT36 PE=2 SV=1                            | 0,564 |
| O75390     | Citrate synthase, mitochondrial OS=Homo sapiens GN=CS PE=1 SV=2                             | 0,563 |
| Q9Y2T3     | Guanine deaminase OS=Homo sapiens GN=GDA PE=1 SV=1                                          | 0,563 |
| P04350     | Tubulin beta-4A chain OS=Homo sapiens GN=TUBB4A PE=1 SV=2                                   | 0,562 |



|            |                                                                                                        |       |
|------------|--------------------------------------------------------------------------------------------------------|-------|
| P30153     | Serine/threonine-protein phosphatase 2A 65 kDa regulatory subunit A alpha isoform OS=Homo sapiens      | 0,561 |
| Q7L0J3     | Synaptic vesicle glycoprotein 2A OS=Homo sapiens GN=SV2A PE=1 SV=1                                     | 0,559 |
| F8WF69     | Isoform of P09496, Clathrin light chain A OS=Homo sapiens GN=CLTA PE=1 SV=1                            | 0,559 |
| H7BY58     | Isoform of P22061, Protein-L-isoaspartate O-methyltransferase OS=Homo sapiens GN=PCMT1 PE=1 SV=1       | 0,559 |
| Q04695     | Keratin, type I cytoskeletal 17 OS=Homo sapiens GN=KRT17 PE=1 SV=2                                     | 0,555 |
| P06702     | Protein S100-A9 OS=Homo sapiens GN=S100A9 PE=1 SV=1                                                    | 0,554 |
| P05387     | 60S acidic ribosomal protein P2 OS=Homo sapiens GN=RPLP2 PE=1 SV=1                                     | 0,552 |
| P28072     | Proteasome subunit beta type-6 OS=Homo sapiens GN=PSMB6 PE=1 SV=4                                      | 0,55  |
| A0A1C7CYX9 | Dihydropyrimidinase-related protein 2 OS=Homo sapiens GN=DPYSL2 PE=1 SV=1                              | 0,548 |
| P31946     | 14-3-3 protein beta/alpha OS=Homo sapiens GN=YWHAB PE=1 SV=3                                           | 0,545 |
| P46459     | Vesicle-fusing ATPase OS=Homo sapiens GN=NSF PE=1 SV=3                                                 | 0,544 |
| Q9UPV7     | PHD finger protein 24 OS=Homo sapiens GN=PHF24 PE=1 SV=2                                               | 0,539 |
| A0A0B4J231 | Isoform of B9A064, Immunoglobulin lambda-like polypeptide 5 OS=Homo sapiens GN=IGLL5 PE=1 SV=1         | 0,531 |
| P46821     | Microtubule-associated protein 1B OS=Homo sapiens GN=MAP1B PE=1 SV=2                                   | 0,529 |
| E7EPK1     | Isoform of Q16181, Septin-7 OS=Homo sapiens GN=SEPT7 PE=1 SV=2                                         | 0,525 |
| P09936     | Ubiquitin carboxyl-terminal hydrolase isozyme L1 OS=Homo sapiens GN=UCHL1 PE=1 SV=2                    | 0,525 |
| P61266     | Syntaxin-1B OS=Homo sapiens GN=STX1B PE=1 SV=1                                                         | 0,52  |
| P62701     | 40S ribosomal protein S4, X isoform OS=Homo sapiens GN=RPS4X PE=1 SV=2                                 | 0,52  |
| P21281     | V-type proton ATPase subunit B, brain isoform OS=Homo sapiens GN=ATP6V1B2 PE=1 SV=3                    | 0,514 |
| P17987     | T-complex protein 1 subunit alpha OS=Homo sapiens GN=TCP1 PE=1 SV=1                                    | 0,512 |
| P08779     | Keratin, type I cytoskeletal 16 OS=Homo sapiens GN=KRT16 PE=1 SV=4                                     | 0,51  |
| Q14194     | Dihydropyrimidinase-related protein 1 OS=Homo sapiens GN=CRMP1 PE=1 SV=1                               | 0,509 |
| Q12860     | Contactin-1 OS=Homo sapiens GN=CNTN1 PE=1 SV=1                                                         | 0,503 |
| P40926     | Malate dehydrogenase, mitochondrial OS=Homo sapiens GN=MDH2 PE=1 SV=3                                  | 0,502 |
| Q9NZT1     | Calmodulin-like protein 5 OS=Homo sapiens GN=CALML5 PE=1 SV=2                                          | 0,501 |
| P23396     | 40S ribosomal protein S3 OS=Homo sapiens GN=RPS3 PE=1 SV=2                                             | 0,501 |
| P02533     | Keratin, type I cytoskeletal 14 OS=Homo sapiens GN=KRT14 PE=1 SV=4                                     | 0,493 |
| Q9BY11     | Protein kinase C and casein kinase substrate in neurons protein 1 OS=Homo sapiens GN=PACSIN1 PE=1 SV=1 | 0,489 |
| P11142     | Heat shock cognate 71 kDa protein OS=Homo sapiens GN=HSPA8 PE=1 SV=1                                   | 0,487 |
| Q16720     | Plasma membrane calcium-transporting ATPase 3 OS=Homo sapiens GN=ATP2B3 PE=1 SV=3                      | 0,483 |
| P04264     | Keratin, type II cytoskeletal 1 OS=Homo sapiens GN=KRT1 PE=1 SV=6                                      | 0,481 |
| P31944     | Caspase-14 OS=Homo sapiens GN=CASP14 PE=1 SV=2                                                         | 0,48  |
| P81605     | Dermcidin OS=Homo sapiens GN=DCD PE=1 SV=2                                                             | 0,479 |

|            |                                                                                               |       |
|------------|-----------------------------------------------------------------------------------------------|-------|
| P04075     | Fructose-bisphosphate aldolase A OS=Homo sapiens GN=ALDOA PE=1 SV=2                           | 0,478 |
| P63104     | 14-3-3 protein zeta/delta OS=Homo sapiens GN=YWHAZ PE=1 SV=1                                  | 0,474 |
| P04259     | Keratin, type II cytoskeletal 6B OS=Homo sapiens GN=KRT6B PE=1 SV=5                           | 0,473 |
| A0A0A0MT26 | Isoform of P13637, Sodium/potassium-transporting ATPase subunit alpha-3 OS=Homo sapiens GN=AT | 0,472 |
| P30101     | Protein disulfide-isomerase A3 OS=Homo sapiens GN=PDIA3 PE=1 SV=4                             | 0,472 |
| P32119     | Peroxiredoxin-2 OS=Homo sapiens GN=PRDX2 PE=1 SV=5                                            | 0,467 |
| P14136     | Glial fibrillary acidic protein OS=Homo sapiens GN=GFAP PE=1 SV=1                             | 0,466 |
| P13646     | Keratin, type I cytoskeletal 13 OS=Homo sapiens GN=KRT13 PE=1 SV=4                            | 0,461 |
| P69905     | Hemoglobin subunit alpha OS=Homo sapiens GN=HBA1 PE=1 SV=2                                    | 0,46  |
| P68366     | Tubulin alpha-4A chain OS=Homo sapiens GN=TUBA4A PE=1 SV=1                                    | 0,457 |
| P27797     | Calreticulin OS=Homo sapiens GN=CALR PE=1 SV=1                                                | 0,454 |
| P35527     | Keratin, type I cytoskeletal 9 OS=Homo sapiens GN=KRT9 PE=1 SV=3                              | 0,452 |
| D6RER5     | Isoform of Q9NVA2, Septin-11 OS=Homo sapiens GN=SEPT11 PE=1 SV=1                              | 0,452 |
| P27348     | 14-3-3 protein theta OS=Homo sapiens GN=YWHAQ PE=1 SV=1                                       | 0,451 |
| Q04917     | 14-3-3 protein eta OS=Homo sapiens GN=YWHAH PE=1 SV=4                                         | 0,45  |
| Q14103     | Heterogeneous nuclear ribonucleoprotein D0 OS=Homo sapiens GN=HNRNPD PE=1 SV=1                | 0,443 |
| P20618     | Proteasome subunit beta type-1 OS=Homo sapiens GN=PSMB1 PE=1 SV=2                             | 0,441 |
| P34932     | Heat shock 70 kDa protein 4 OS=Homo sapiens GN=HSPA4 PE=1 SV=4                                | 0,434 |
| V9GZ17     | Isoform of Q9NY65, Tubulin alpha-8 chain (Fragment) OS=Homo sapiens GN=TUBA8 PE=1 SV=1        | 0,431 |
| P43004     | Excitatory amino acid transporter 2 OS=Homo sapiens GN=SLC1A2 PE=1 SV=2                       | 0,429 |
| P61978     | Heterogeneous nuclear ribonucleoprotein K OS=Homo sapiens GN=HNRNPK PE=1 SV=1                 | 0,425 |
| P47914     | 60S ribosomal protein L29 OS=Homo sapiens GN=RPL29 PE=1 SV=2                                  | 0,424 |
| G3V5Z7     | Isoform of P60900, Proteasome subunit alpha type OS=Homo sapiens GN=PSMA6 PE=1 SV=1           | 0,422 |
| Q99436     | Proteasome subunit beta type-7 OS=Homo sapiens GN=PSMB7 PE=1 SV=1                             | 0,417 |
| Q96JE9     | Microtubule-associated protein 6 OS=Homo sapiens GN=MAP6 PE=1 SV=2                            | 0,412 |
| Q13825     | Methylglutaconyl-CoA hydratase, mitochondrial OS=Homo sapiens GN=AUH PE=1 SV=1                | 0,406 |
| P00918     | Carbonic anhydrase 2 OS=Homo sapiens GN=CA2 PE=1 SV=2                                         | 0,403 |
| P45880     | Voltage-dependent anion-selective channel protein 2 OS=Homo sapiens GN=VDAC2 PE=1 SV=2        | 0,403 |
| P54652     | Heat shock-related 70 kDa protein 2 OS=Homo sapiens GN=HSPA2 PE=1 SV=1                        | 0,403 |
| Q9H3Z4     | DnaJ homolog subfamily C member 5 OS=Homo sapiens GN=DNAJC5 PE=1 SV=1                         | 0,399 |
| P61313     | 60S ribosomal protein L15 OS=Homo sapiens GN=RPL15 PE=1 SV=2                                  | 0,396 |
| Q96FJ2     | Dynein light chain 2, cytoplasmic OS=Homo sapiens GN=DYNLL2 PE=1 SV=1                         | 0,395 |
| O14594     | Neurocan core protein OS=Homo sapiens GN=NCAN PE=1 SV=3                                       | 0,38  |

|            |                                                                                                      |       |
|------------|------------------------------------------------------------------------------------------------------|-------|
| P55087     | Aquaporin-4 OS=Homo sapiens GN=AQP4 PE=1 SV=2                                                        | 0,379 |
| P68871     | Hemoglobin subunit beta OS=Homo sapiens GN=HBB PE=1 SV=2                                             | 0,378 |
| O75822     | Eukaryotic translation initiation factor 3 subunit J OS=Homo sapiens GN=EIF3J PE=1 SV=2              | 0,375 |
| A0A0D9SGF6 | Isoform of Q13813, Spectrin alpha chain, non-erythrocytic 1 OS=Homo sapiens GN=SPTAN1 PE=1 SV=       | 0,371 |
| Q96HN2     | Adenosylhomocysteinase 3 OS=Homo sapiens GN=AHCYL2 PE=1 SV=1                                         | 0,367 |
| P49721     | Proteasome subunit beta type-2 OS=Homo sapiens GN=PSMB2 PE=1 SV=1                                    | 0,358 |
| P36543     | V-type proton ATPase subunit E 1 OS=Homo sapiens GN=ATP6V1E1 PE=1 SV=1                               | 0,358 |
| P46776     | 60S ribosomal protein L27a OS=Homo sapiens GN=RPL27A PE=1 SV=2                                       | 0,355 |
| P36871     | Phosphoglucomutase-1 OS=Homo sapiens GN=PGM1 PE=1 SV=3                                               | 0,353 |
| A0A087WZQ7 | Isoform of Q9H115, Beta-soluble NSF attachment protein OS=Homo sapiens GN=NAPB PE=1 SV=1             | 0,35  |
| P21283     | V-type proton ATPase subunit C 1 OS=Homo sapiens GN=ATP6V1C1 PE=1 SV=4                               | 0,347 |
| P15104     | Glutamine synthetase OS=Homo sapiens GN=GLUL PE=1 SV=4                                               | 0,345 |
| P04271     | Protein S100-B OS=Homo sapiens GN=S100B PE=1 SV=2                                                    | 0,344 |
| P62942     | Peptidyl-prolyl cis-trans isomerase FKBP1A OS=Homo sapiens GN=FKBP1A PE=1 SV=2                       | 0,341 |
| P78371     | T-complex protein 1 subunit beta OS=Homo sapiens GN=CCT2 PE=1 SV=4                                   | 0,332 |
| A0A087WUZ3 | Spectrin beta chain OS=Homo sapiens GN=SPTBN1 PE=1 SV=1                                              | 0,326 |
| Q93050     | V-type proton ATPase 116 kDa subunit a isoform 1 OS=Homo sapiens GN=ATP6V0A1 PE=1 SV=3               | 0,314 |
| O95670     | V-type proton ATPase subunit G 2 OS=Homo sapiens GN=ATP6V1G2 PE=2 SV=1                               | 0,313 |
| P50993     | Sodium/potassium-transporting ATPase subunit alpha-2 OS=Homo sapiens GN=ATP1A2 PE=1 SV=1             | 0,305 |
| F5GYQ1     | Isoform of P61421, V-type proton ATPase subunit d 1 OS=Homo sapiens GN=ATP6V0D1 PE=1 SV=1            | 0,304 |
| H7BYR8     | Isoform of P02686, Myelin basic protein OS=Homo sapiens GN=MBP PE=1 SV=1                             | 0,299 |
| P52209     | 6-phosphogluconate dehydrogenase, decarboxylating OS=Homo sapiens GN=PGD PE=1 SV=3                   | 0,286 |
| Q08380     | Galectin-3-binding protein OS=Homo sapiens GN=LGALS3BP PE=1 SV=1                                     | 0,284 |
| P02686     | Myelin basic protein OS=Homo sapiens GN=MBP PE=1 SV=3                                                | 0,284 |
| P80723     | Brain acid soluble protein 1 OS=Homo sapiens GN=BASP1 PE=1 SV=2                                      | 0,271 |
| P46976     | Glycogenin-1 OS=Homo sapiens GN=GYG1 PE=1 SV=4                                                       | 0,269 |
| Q15907     | Ras-related protein Rab-11B OS=Homo sapiens GN=RAB11B PE=1 SV=4                                      | 0,268 |
| P05026     | Sodium/potassium-transporting ATPase subunit beta-1 OS=Homo sapiens GN=ATP1B1 PE=1 SV=1              | 0,267 |
| P62873     | Guanine nucleotide-binding protein G(I)/G(S)/G(T) subunit beta-1 OS=Homo sapiens GN=GNB1 PE=1 SV=1   | 0,267 |
| H3BNQ7     | Isoform of P80404, 4-aminobutyrate aminotransferase, mitochondrial OS=Homo sapiens GN=ABAT PE=1 SV=1 | 0,266 |
| P09543     | 2',3'-cyclic-nucleotide 3'-phosphodiesterase OS=Homo sapiens GN=CNP PE=1 SV=2                        | 0,265 |
| P30041     | Peroxiredoxin-6 OS=Homo sapiens GN=PRDX6 PE=1 SV=3                                                   | 0,263 |
| E7EX88     | Aggrecan core protein OS=Homo sapiens GN=ACAN PE=1 SV=2                                              | 0,257 |

|            |                                                                                              |       |
|------------|----------------------------------------------------------------------------------------------|-------|
| Q96GW7     | Brevican core protein OS=Homo sapiens GN=BCAN PE=1 SV=2                                      | 0,255 |
| Q9Y2A7     | Nck-associated protein 1 OS=Homo sapiens GN=NCKAP1 PE=1 SV=1                                 | 0,213 |
| Q5D862     | Filaggrin-2 OS=Homo sapiens GN=FLG2 PE=1 SV=1                                                | 0,209 |
| Q9HCC0     | Methylcrotonoyl-CoA carboxylase beta chain, mitochondrial OS=Homo sapiens GN=MCCC2 PE=1 SV=1 | 0,207 |
| Q92747     | Actin-related protein 2/3 complex subunit 1A OS=Homo sapiens GN=ARPC1A PE=1 SV=2             | 0,204 |
| A0A0G2JHM8 | Myelin-oligodendrocyte glycoprotein OS=Homo sapiens GN=MOG PE=1 SV=1                         | 0,2   |
| Q9GZV7     | Hyaluronan and proteoglycan link protein 2 OS=Homo sapiens GN=HAPLN2 PE=2 SV=1               | 0,187 |
| Q13404     | Ubiquitin-conjugating enzyme E2 variant 1 OS=Homo sapiens GN=UBE2V1 PE=1 SV=2                | 0,178 |
| P10915     | Hyaluronan and proteoglycan link protein 1 OS=Homo sapiens GN=HAPLN1 PE=2 SV=2               | 0,155 |
| H3BLU2     | Limbic system-associated membrane protein (Fragment) OS=Homo sapiens GN=LSAMP PE=1 SV=1      | 0,15  |
| P00441     | Superoxide dismutase [Cu-Zn] OS=Homo sapiens GN=SOD1 PE=1 SV=2                               | 0,146 |
| P41222     | Prostaglandin-H2 D-isomerase OS=Homo sapiens GN=PTGDS PE=1 SV=1                              | 0,141 |
| A0A075B6H6 | Isoform of P01834, Ig kappa chain C region (Fragment) OS=Homo sapiens GN=IGKC PE=1 SV=1      | 0,125 |
| P40306     | Proteasome subunit beta type-10 OS=Homo sapiens GN=PSMB10 PE=1 SV=1                          | 0,098 |
| P00738     | Haptoglobin OS=Homo sapiens GN=HP PE=1 SV=1                                                  | 0,079 |
| P13611     | Versican core protein OS=Homo sapiens GN=VCAN PE=1 SV=3                                      | 0,075 |
| A0A1B0GUU9 | Isoform of P01871, Ig mu chain C region (Fragment) OS=Homo sapiens GN=IGHM PE=1 SV=1         | 0,06  |
